# Supplementary material
Source: ML conference proceedings conference paper supplement (https://openreview.net/forum?id=2rgYVFiWPL)
Supplement: supplementary_material [file schrodinger_potentials_supplemental.pdf › schrodinger_potentials_supplemental.pdf]

---

# Sample complexity of Schrödinger potential estimation

---

Anonymous Author(s)

Affiliation

Address

email

## Abstract

1 We address the problem of Schrödinger potential estimation, which plays a crucial  
2 role in modern generative modelling approaches based on Schrödinger bridges and  
3 stochastic optimal control for SDEs. Given a simple prior diffusion process, these  
4 methods search for a path between two given distributions  $\rho_0$  and  $\rho_T$  requiring min-  
5 imal efforts. The optimal drift in this case can be expressed through a Schrödinger  
6 potential. In the present paper, we study generalization ability of an empirical  
7 Kullback-Leibler (KL) risk minimizer over a class of admissible log-potentials  
8 aimed at fitting the marginal distribution at time  $T$ . Under reasonable assumptions  
9 on the target distribution  $\rho_T$  and the prior process, we derive a non-asymptotic  
10 high-probability upper bound on the KL-divergence between  $\rho_T$  and the terminal  
11 density corresponding to the estimated log-potential. In particular, we show that  
12 the excess KL-risk may decrease as fast as  $\mathcal{O}(\log n/n)$  when the sample size  $n$   
13 tends to infinity even if both  $\rho_0$  and  $\rho_T$  have unbounded supports.

## 14 1 Introduction

15 The Schrödinger Bridge problem (SBP) originates from a question posed by Erwin Schrödinger in  
16 1932 [Schrödinger, 1932], seeking the most likely evolution of a probability distribution between  
17 two given endpoint distributions while minimizing relative entropy with respect to a prior stochastic  
18 process. This problem has deep connections with optimal transport [Leonard, 2014] and stochastic  
19 control [Dai Pra, 1991]. In its simplest continuous-time form, one aims to construct a so-called  
20 *Schrödinger Markov process* whose joint begin-end distribution  $\pi(dx, dz)$  has the representation

$$\pi(dx, dz) = Q(z, T \mid x, 0) \nu_0(dx) \nu_T(dz), \quad (1)$$

21 where  $Q(z, T \mid x, 0)$  is the transition kernel of a reference Markov process, and  $\nu_0, \nu_T$  are unknown  
22 “boundary potentials” to be determined. The desired marginals  $\pi(dx, \mathbb{R}^d)$  and  $\pi(\mathbb{R}^d, dz)$  are given,  
23 and one seeks  $\nu_0$  and  $\nu_T$  that reproduce these marginals. In the rest of the paper, we assume that  
24 both  $\pi(dx, \mathbb{R}^d)$  and  $\pi(\mathbb{R}^d, dz)$  are absolutely continuous with respect to the Lebesgue measure and  
25 denote the corresponding densities by  $\rho_0$  and  $\rho_T^*$ , respectively. Classical existence proofs for the SBP  
26 date back to Fortet [1940] (in 1D) and Beurling [1960], with a modern fixed-point approach in [Chen  
27 et al., 2016]. Recent extensions to the case of noncompactly supported marginal distributions can be  
28 found in [Conforti et al., 2024] and [Eckstein, 2025]. Recently, the problem attracted attention of  
29 machine learners in the context of generative modelling (see, for instance, [Tzen and Raginsky, 2019,  
30 De Bortoli et al., 2021, Shi et al., 2023, Korotin et al., 2024, Gushchin et al., 2024a, Rapakoulis  
31 et al., 2024] to name a few). It follows from Theorem 3.2 in [Dai Pra, 1991] that the optimal Markov  
32 process  $X_t^*$  solving the Schrödinger problem with marginals  $(\rho_0, \rho_T^*)$  can be constructed as a solution  
33 of the following SDE:

$$dX_t^* = (b(X_t^*, t) + \sigma(X_t^*, t)\sigma(X_t^*, t)^\top \nabla \log h(X_t^*, t)) dt + \sigma(X_t^*, t) dW_t, \quad X_0 \sim \rho_0,$$

34 where

$$h(w, t) = \int_{\mathbb{R}^d} Q(y, T \mid w, t) \nu_T(dy)$$

35 and  $Q$  is the transition density of the reference (or base) diffusion process

$$dX_t = b(X_t, t) dt + \sigma(X_t, t) dW_t, \quad X_0 \sim \rho_0.$$

36 The transition density  $Q^*$  of the reciprocal process  $X_t^*$  can be obtained from  $Q$  via the so-called  
37 Doob's  $h$ -transform:

$$Q^*(y, T \mid x, t) = Q(y, T \mid x, t) \frac{h(y, T)}{h(x, t)}. \quad (2)$$

38 This is precisely the law of the base process conditioned by the function  $h$  (see [Jamison, 1974]). In  
39 many presentations of the Schrödinger Bridge problem, one takes a very simple reference process (for  
40 instance, a Brownian motion) so that its transition kernel is straightforward to write down (see, for  
41 example, [Pooladian and Niles-Weed, 2024] and [Baptista et al., 2024]). However, there are several  
42 practical and theoretical advantages to considering more general (potentially higher-dimensional, or  
43 with domain constraints, or with a non-trivial drift/diffusion) reference processes.

44 In the present paper, we are interested in estimation of the Schrödinger potential  $\nu_T$  from  $n$  i.i.d.  
45 samples  $Y_1, \dots, Y_n \sim \rho_T^*$ . Given a class of log-potentials  $\Psi$ , we study generalization ability of an  
46 empirical risk minimizer

$$\hat{\psi} \in \operatorname{argmin}_{\psi \in \Psi} \left\{ -\frac{1}{n} \sum_{i=1}^n \log \left( \int_{\mathbb{R}^d} Q(Y_i, T \mid x, 0) \frac{h_\psi(Y_i, T)}{h_\psi(x, 0)} \rho_0(x) dx \right) \right\}, \quad (3)$$

47 where

$$h_\psi(x, t) = \int Q(y, T \mid x, t) e^{\psi(y)} dy.$$

48 Let us note that, in view of (2),

$$\rho_T^\psi(y) = \int_{\mathbb{R}^d} Q(y, T \mid x, 0) \frac{h_\psi(y, T)}{h_\psi(x, 0)} \rho_0(x) dx$$

49 is the marginal endpoint probability density of a diffusion process  $X_t^\psi$  corresponding to Doob's  
50  $h_\psi$ -transform:

$$dX_t^\psi = \left( b(X_t^\psi, t) + \sigma(X_t^\psi, t) \sigma(X_t^\psi, t)^\top \nabla \log h_\psi(X_t^\psi, t) \right) dt + \sigma(X_t^\psi, t) dW_t, \quad X_0 \sim \rho_0.$$

51 In other words, the estimate  $\hat{\psi}$  minimizes empirical Kullback-Leibler (KL) divergence between the  
52 actual target  $\rho_T^*$  and the marginal densities  $\rho_T^\psi$  over the class of admissible log-potentials  $\Psi$ . That is,  
53 we chose the log-potential  $\psi$  that makes the transformed reference diffusion hit the observed terminal  
54 law, and measure error only through KL of the marginals. Because  $h_\psi$  is used inside the Doob factor,  
55 the learnt potential is compatible with a single Markov process; one never risks obtaining mutually  
56 inconsistent forward/backward potentials. The method combines the full problem (the marginals,  
57 transition densities, and the potential function) into one single optimization framework. By doing so,  
58 it aims to directly minimize the objective of matching the marginals at time  $T$  without separating the  
59 problem into smaller subproblems. In contrast, the Sinkhorn algorithm, commonly used for optimal  
60 transport problems, approaches the problem by iteratively updating the potentials in a decoupled  
61 manner. At each iteration, a simpler least squares problem appears, which is linear in one potential  
62 function given that another one is fixed from the previous iteration. The Sinkhorn algorithm alternates  
63 between updating the potential functions to match the marginals of the distributions and adjusting the  
64 transport plan until convergence. We refer to Pooladian and Niles-Weed [2024], Chiarini et al. [2024]  
65 for recent results. The primary advantage of the Sinkhorn approach is its computational efficiency.  
66 By decoupling the optimization process into simpler, linear problems, the Sinkhorn method can  
67 handle large-scale problems effectively. This iterative procedure allows for faster updates, and it has  
68 become a popular method for many optimal transport applications, see Genevay et al. [2018], March  
69 and Henry-Labordere [2023] However, the approach presented in this paper differs in that it does  
70 not separate the problem into independent steps. Instead, it aims at solving the Schrödinger system

approximately by formulating it as a single optimization problem involving Doob  $h$ -transform of the base process  $X$  parametrized by the Schrödinger potential. Unlike iterative proportional fitting (Sinkhorn), everything is learnt in one go, avoiding slow or unstable fixed-point cycles. This results in a more accurate and robust solution. The trade-off between the two methods lies in computational efficiency versus the quality of the solution. The Sinkhorn approach provides a quick and efficient solution by solving simpler problems at each iteration, but it may not achieve the best possible solution for the full problem. On the other hand, the method presented in this paper offers a more holistic approach, which could lead to a more accurate matching of the marginal distributions but might require more computational resources.

The approach presented in this paper can also be compared to methods that rely on optimization over transport maps, see Korotin et al. [2024], Gushchin et al. [2024a]. In transport map-based approaches, the goal is to find a map  $\mathcal{T}$  that transports one probability distribution to another. The optimization typically focuses on minimizing a quadratic cost functional that penalizes the difference between the target distribution and the transformed distribution under the transport map. These methods are often framed as optimal transport problems, where the map  $\mathcal{T}$  is determined by solving an optimization problem that involves the marginal distributions. The advantage of optimization over transport maps lies in its clear geometric interpretation, where the transport map provides a direct way to relate the two distributions. This can lead to efficient algorithms, especially when the transport map can be parametrized in a way that allows for fast computations, such as in the case of certain neural network architectures or simple affine transformations, Rapakoulis et al. [2024].

However, transport map-based approaches are typically constrained to quadratic costs, which may limit their applicability in some cases. Specifically, quadratic cost functionals, such as the 2-Wasserstein distance, often assume a certain structure or symmetry that may not be ideal for more general or complex problems.

In contrast, the approach discussed in this paper is not limited to quadratic costs. It allows for more general cost structures and is based on minimizing the Kullback-Leibler divergence (KL-divergence), which can accommodate a wider range of problem types. This flexibility is particularly valuable when dealing with more complex distributions or when the underlying problem involves non-quadratic costs that capture other aspects of the distribution, such as entropy regularization or non-linear interactions between variables.

**Contribution** The main contribution of the present paper is a sharper non-asymptotic high-probability upper bound on generalization error of the empirical risk minimizer  $\hat{\psi}$  defined in (3).

- Taking a multivariate Ornstein-Uhlenbeck process as the reference one, we show that (see Theorem 1), with probability at least  $(1 - 2\delta)$ , the excess KL-risk of the marginal endpoint density  $\hat{\rho}_T$  corresponding to  $\hat{\psi}$  satisfies the inequality

$$\text{KL}(\rho_T^*, \hat{\rho}_T) - \inf_{\psi \in \Psi} \text{KL}(\rho_T^*, \rho_T^\psi) \lesssim \sqrt{\Upsilon(n, \delta) \inf_{\psi \in \Psi} \text{KL}(\rho_T^*, \rho_T^\psi)} + \Upsilon(n, \delta),$$

where

$$\Upsilon(n, \delta) \lesssim \frac{\log^2 n + \log(1/\delta) \log n}{n}.$$

Here and further in the paper, the sign  $\lesssim$  stands for an inequality up to a multiplicative constant. The derived upper bound has several advantages over the existing results. First, in contrast to Korotin et al. [2024], the excess risk may decrease as fast as  $\mathcal{O}(\log^2 n/n)$  provided that the class of log-potentials  $\Psi$  is rich enough to approximate the target density  $\rho_T^*$ . Second, unlike theoretical guarantees for Sinkhorn-based approaches (see e.g. Pooladian and Niles-Weed [2024]), we are able to relate the endpoint marginal densities  $\rho_T^*$  and  $\hat{\rho}_T$ .

- We impose very mild assumptions on the target density  $\rho_T^*$ . We only require  $\rho_T^*$  to be bounded and sub-Gaussian. On the other hand, the available convergence proofs for the Sinkhorn algorithm rely on the stronger assumption that the marginals are log-concave, see Conforti et al. [2024]. We also avoid the so-called strong density assumptions like boundedness from below often used in nonparametric statistics in the context of log-density estimation.
- The assumptions on the class of log-potentials  $\Psi$  are also reasonable. We support our claim with several examples.

**Paper structure** The rest of the paper is organized as follows. Section 2 is devoted to a short review of related work. In Section 3, we introduce necessary definitions and notations. After that, we present our main result (Theorem 1) in Section 4 and discuss main ideas of its proof in Section 5. Rigorous derivations as well as auxiliary technical results are deferred to the supplementary material.

## 2 Related work

Here is a short review of methods used in the literature to compute Schrödinger potentials, including the Sinkhorn algorithm. The Schrödinger potential, which arises in optimal transport problems, represents a key component in the solution of transport problems involving marginal distributions. Over time, several methods have been proposed to compute these potentials efficiently, with applications in areas ranging from statistical mechanics to machine learning. Here, we review some of the most prominent methods used in the literature.

**Sinkhorn algorithm** The Sinkhorn algorithm Sinkhorn [1967] is one of the most widely used methods for computing Schrödinger potentials in the context of optimal transport. It is based on iterative scaling and aims to solve the optimal transport problem by alternating between updating two potentials  $\nu_0$  and  $\nu_T$  to enforce marginal constraints. The key advantage of the Sinkhorn approach is its computational efficiency, particularly when the transport problem is framed with a quadratic cost (such as the 2-Wasserstein distance), see Pavon et al. [2021], Chen et al. [2021], Stromme [2023] for reference. In each iteration, the algorithm solves a simpler problem that involves scaling the potentials in a way that brings the marginals of the transformed distribution closer to the target. Although Sinkhorn’s algorithm is efficient and widely applicable, it is often limited by its assumption of quadratic costs. Additionally, the algorithm does not directly handle more complex cost structures, such as non-quadratic costs or non-linear dynamics, which can be a limitation in some applications.

**Sinkhorn bridge** The Sinkhorn Bridge proposed by Pooladian and Niles-Weed [2024], provides a way to estimate the Schrödinger bridge using Sinkhorn’s algorithm in an efficient manner. The key insight of this method is that the potentials obtained from the static entropic optimal transport problem can be modified to yield a natural plug-in estimator for the drift function that defines the Schrödinger bridge. However, this work does not provide bounds on the distance between marginal distributions at time  $T = 1$  because there is an exploding term  $(1 - \tau)^{k+2}$  as  $\tau \rightarrow 1$  where  $k$  is the dimension of the underlying manifold. This term leads to a “curse of dimensionality” where the error grows rapidly as  $\tau$  approaches 1, especially in high-dimensional settings. As a result, the estimation error increases significantly when attempting to estimate the Schrödinger bridge at the terminal time, making it difficult to obtain precise bounds for  $T = 1$ .

**Dual Formulation of the Schrödinger Problem** In the dual formulation of the Schrödinger problem, the Schrödinger potential is computed by solving a convex optimization problem. This approach reformulates the problem in terms of a dual objective that involves the Kullback-Leibler (KL) divergence between the target and predicted distributions. The dual problem is then solved using optimization techniques such as gradient descent or variational methods, see Zhang and Chen [2022], Tzen and Raginsky [2019] for reference. This formulation is more flexible than the Sinkhorn algorithm, as it can accommodate more general cost functions and is not limited to quadratic losses.

While the dual approach is flexible, it is often computationally more demanding than Sinkhorn’s method due to the need for iterative optimization over high-dimensional spaces. This makes the dual formulation suitable for smaller or more specialized problems, but it can become computationally expensive in large-scale applications.

**Approximate Solutions Using Monte Carlo Methods** Monte Carlo methods, particularly those relying on reverse diffusion processes, have also been employed to approximate Schrödinger potentials. In these methods, a reverse process is simulated, and the potential is iteratively refined to minimize the discrepancy between the predicted and target marginals, see Korotin et al. [2024] for reference. These methods are often used when the problem involves complex dynamics that are difficult to capture using direct optimization techniques.

170 Monte Carlo methods are particularly useful when dealing with high-dimensional problems, as they  
 171 allow for the sampling of large spaces. However, they can be computationally expensive and may  
 172 require a significant number of samples to achieve an accurate solution.

173 In addition, there are approaches that rely heavily on Monte Carlo approximations of intermediate  
 174 values rather than the Schrödinger potentials themselves, among which the following should be noted  
 175 De Bortoli et al. [2021], Vargas et al. [2021], Peluchetti [2023].

176 **Neural Network-Based Approaches** Recent advancements in deep learning have led to the use of  
 177 neural networks to approximate Schrödinger potentials. These approaches treat the potential function  
 178 as a parameterized neural network and use gradient-based optimization techniques to learn the  
 179 potential that best matches the marginals. The use of neural networks offers a flexible and powerful  
 180 way to model complex non-linear potentials, making these methods well-suited for problems with  
 181 intricate dynamics or non-quadratic costs. While neural network-based approaches are highly flexible,  
 182 they require large amounts of data and computational resources to train the network, and they are  
 183 often prone to overfitting if not regularized appropriately. Despite these challenges, they represent a  
 184 promising direction for future research, especially when the problem at hand involves complex and  
 185 high-dimensional systems. We refer to Liu et al. [2023], Wang et al. [2021] for recent results.

186 **Iterative Markovian Fitting** The Iterative Markovian Fitting (IMF) method, introduced in the  
 187 recent work by Shi et al. [2023], offers an approach to solving Schrödinger Bridge (SB) problems.  
 188 Unlike previous methods, such as Iterative Proportional Fitting (IPF), IMF guarantees the preservation  
 189 of both the initial and terminal distributions in each iteration, which is a key advantage over IPF  
 190 where these marginals are not always preserved. IMF alternates between two types of projections:  
 191 Markovian projections and reciprocal projections, ensuring that the resulting distribution remains  
 192 within the correct class (Markovian or reciprocal) while progressively approximating the Schrödinger  
 193 Bridge. We refer to Gushchin et al. [2024b] for recent results.

194 In Silveri et al. [2024], the authors provide the convergence analysis for diffusion flow matching  
 195 (DFM), a method used to generate approximate samples from a target distribution by bridging it with a  
 196 base distribution through diffusion dynamics. Their theoretical work includes non-asymptotic bounds  
 197 on the Kullback-Leibler (KL) divergence between the true target distribution and the distribution  
 198 generated by the DFM model. A key insight from this paper is the incorporation of two sources  
 199 of error: drift-estimation and time-discretization errors. However, while the convergence analysis  
 200 offers theoretical guarantees, the statistical error is not explicitly addressed in this paper. The analysis  
 201 assumes that all expectations are exact, which might not hold in practical settings where samples are  
 202 finite, and statistical errors could arise due to the approximations involved in the generative process.  
 203 Thus, future work will need to extend this analysis to quantify the impact of statistical approximations  
 204 in finite-sample settings.

### 205 3 Preliminaries and notations

206 This section collects necessary definitions and notations. As we announced in the contribution  
 207 paragraph, we are going to consider a multivariate Ornstein-Uhlenbeck process as a reference one.  
 208 For this reason, we elaborate on its basic properties in this section.

209 **Multivariate Ornstein-Uhlenbeck process** To be more specific, we will consider the base process  
 210  $X_t^0$  solving the SDE

$$dX_t^0 = b(m - X_t^0) dt + \Sigma^{1/2} dW_t, \quad 0 \leq t \leq T,$$

211 where  $b > 0$  controls the drift rate,  $m \in \mathbb{R}^d$  represents the mean-reversion level,  $\Sigma \in \mathbb{R}^{d \times d}$  is a  
 212 positive definite symmetric matrix, and  $W_t$  is a standard  $d$ -dimensional Wiener process. It is known  
 213 that the conditional distribution of  $X_t^0$  given  $X_0^0 = x$  is Gaussian  $\mathcal{N}(m_t(x), \Sigma_t)$  with

$$m_t(x) = (1 - e^{-bt})m + e^{-bt}x \quad \text{and} \quad \Sigma_t = \frac{1 - e^{-2bt}}{2b} \Sigma. \quad (4)$$

214 This implies that the corresponding Doob's  $h$ -transform can be expressed through the Ornstein-  
 215 Uhlenbeck operator

$$\mathcal{T}_t g(x) = \frac{1}{(2\pi)^{d/2} \sqrt{\det(\Sigma_t)}} \int_{\mathbb{R}^d} \exp \left\{ -\frac{1}{2} \|\Sigma_t^{-1/2} (y - m_t(x))\|^2 \right\} g(y) dy.$$

216 Indeed, it holds that  $h_\psi(x, t) = \mathcal{T}_{T-t} e^{\psi(x)}$ . Then, introducing

$$q(y | x) = \frac{1}{(2\pi)^{d/2} \sqrt{\det(\Sigma_T)}} \exp \left\{ -\frac{1}{2} \|\Sigma_T^{-1/2} (y - m_T(x))\|^2 \right\},$$

217 we note that

$$\rho_T^\psi(y) = \int_{\mathbb{R}^d} \frac{q(y | x) e^{\psi(y)}}{\mathcal{T}_T e^{\psi(x)}} \rho_0(x) dx \quad (5)$$

218 is the marginal density of  $X_T^\psi$ , the endpoint of a random process  $X_t^\psi$  governed by  $h_\psi$ :

$$dX_t^\psi = b(m - X_t^\psi) dt + \nabla \log \left( \mathcal{T}_{T-t} e^{\psi(X_t^\psi)} \right) dt + \Sigma^{1/2} dW_t, \quad X_0^\psi \sim \rho_0.$$

219 If the Schrödinger potential  $\nu_T$  admits a density  $e^{\psi^*}$  with respect to the Lebesgue measure, then the  
 220 optimally controlled process  $X_t^*$  solves the SDE

$$dX_t^* = b(m - X_t^*) dt + \nabla \log \left( \mathcal{T}_{T-t} e^{\psi^*(X_t^*)} \right) dt + \Sigma^{1/2} dW_t, \quad X_0^* \sim \rho_0.$$

221 Finally, it is well known that the unique stationary (invariant) distribution of  $X_t^0$  is Gaussian, that is,  
 222  $X_t^0$  converges to  $X_\infty^0$  in distribution as  $t \rightarrow \infty$  with  $X_\infty^0 \sim \mathcal{N}(m, \Sigma/(2b))$ . Since the parameters of  
 223 the limiting distribution do not depend on the starting point,  $\mathcal{T}_\infty g(x) \equiv \mathcal{T}_\infty g$  is a constant.

224 **Other notations** The notation  $f \lesssim g$  or  $g \gtrsim f$  means that  $f = \mathcal{O}(g)$ . Besides, we often replace  
 225  $\max\{a, b\}$  and  $\min\{a, b\}$  by shorter expressions  $a \vee b$  and  $a \wedge b$ , respectively. For any  $s \geq 1$ , the  
 226 Orlicz  $\psi_s$ -norm of a random variable  $\xi$  is defined as

$$\|\xi\|_{\psi_s} = \inf \left\{ u > 0 : \mathbb{E} e^{|\xi|^s / u^s} \leq 2 \right\}.$$

227 Finally, given  $p \geq 1$  and a probability density  $\rho$ , the weighted  $L_p$ -norm of a function  $f$  is defined as  
 228  $\|f\|_{L_p(\rho)} = (\mathbb{E}_{\xi \sim \rho} |f(\xi)|^p)^{1/p}$ . Given two probability densities  $\rho_0 \ll \rho_1$  on  $\mathbb{R}^d$ , the Kullback-Leibler  
 229 divergence between them is defined as  $\text{KL}(\rho_0, \rho_1) = \mathbb{E}_{\xi \sim \rho_0} \log(\rho_0(\xi)/\rho_1(\xi))$ .

## 230 4 Main result

231 In the present section, we discuss statistical properties of the empirical risk minimizer  $\hat{\psi}$  defined  
 232 in (3). In particular, Theorem 1 provides a Bernstein-type upper bound on its excess KL-risk. We  
 233 impose the following assumptions. First, as we announced before, we use the Ornstein-Uhlenbeck  
 234 process  $X_t^0$  as the reference one.

235 **Assumption 1.** *The base process  $X^0$  solves the following SDE*

$$dX_t^0 = b(m - X_t^0) dt + \Sigma^{1/2} dW_t, \quad 0 \leq t \leq T.$$

236 where  $b > 0$ ,  $m \in \mathbb{R}^d$ ,  $\Sigma$  is a positive definite symmetric matrix of size  $d \times d$ , and  $W$  is a  $d$ -  
 237 dimensional Brownian motion.

238 Main properties of the Ornstein-Uhlenbeck process were discussed in the previous section. Second,  
 239 we suppose that the target density  $\rho_T^*$  meets the following requirements.

240 **Assumption 2.** *The target distribution at time  $T$  admits a bounded density  $\rho_T^*$  with respect to the*  
 241 *Lebesgue measure such that*

$$\rho_T^*(x) \leq \rho_{\max} \quad \text{for all } x \in \mathbb{R}^d.$$

242 Moreover, the target distribution  $\rho_T^*$  is sub-Gaussian with variance proxy  $v^2$ , that is,

$$\mathbb{E}_{Y \sim \rho_T^*} e^{u^\top Y} \leq e^{v^2 \|u\|^2 / 2} \quad \text{for any } u \in \mathbb{R}^d. \quad (6)$$

Assumption 2 is very mild. Despite the fact that we deal with logarithmic loss, we do not require  $\rho_T^*$  to be bounded away from zero. We do not even require its support to be compact. This significantly complicates the proof of the excess KL-bound and poses nontrivial technical challenges. Let us note that the condition 6 yields that  $\mathbb{E}_{Y \sim \rho_T^*} Y = 0$ . However, it does not diminish generality of our setup.

The remaining assumptions concern properties of the class of log-potentials  $\Psi$ . First, we assume that admissible log-potentials  $\psi(x)$  are bounded from above and behave as  $\mathcal{O}(\|x\|^2)$  as  $x$  tends to infinity.

**Assumption 3.** *There exist non-negative constants  $\Lambda$  and  $M$  such that*

$$-\Lambda \left\| \Sigma^{-1/2}(x - m) \right\|^2 - M \leq \psi(x) \leq M \quad \text{for all } x \in \mathbb{R}^d \text{ and } \psi \in \Psi.$$

Moreover, for any  $\psi \in \Psi$ , it holds that  $\mathcal{T}_\infty \psi = \mathbb{E} \psi(X_\infty) = 0$ .

The condition  $\mathcal{T}_\infty \psi = 0$  appears because of the fact that the Schrödinger potentials  $\nu_0$  and  $\nu_T$  (see (1)) are defined up to a multiplicative constant. The requirement  $\mathcal{T}_\infty \psi = 0$  is nothing but a normalization. Second, we assume that  $\Psi$  is parametrized by a finite-dimensional parameter  $\theta \in \mathbb{R}^D$ :

$$\Psi = \{\psi_\theta : \theta \in \Theta\},$$

where  $\Theta$  is a subset of a  $D$ -dimensional cube  $[-R, R]^D$  and each function  $\psi_\theta$  maps  $\mathbb{R}^d$  onto  $\mathbb{R}$ . We suppose that the parametrization is sufficiently smooth in the following sense.

**Assumption 4.** *There exists  $L \geq 0$  such that*

$$|\psi_\theta(x) - \psi_{\theta'}(x)| \leq L(1 + \|x\|^2) \|\theta - \theta'\|_\infty \quad \text{for all } \theta, \theta' \in \Theta \text{ and all } x \in \mathbb{R}^d.$$

Assumptions 3 and 4 are quite general. We provide two examples when they hold. First, in a recent paper [Korotin et al., 2024], the authors model  $e^{\psi(x)}$  as a Gaussian mixture. Let  $\alpha_1, \dots, \alpha_K$  be non-negative numbers such that  $\alpha_1 + \dots + \alpha_K = 1$  and consider

$$e^{\psi(x)} = e^{-C} \sum_{k=1}^K \alpha_k \varphi_{m_k, \Sigma_k}(x), \quad \text{where} \quad \varphi_{m_k, \Sigma_k}(x) = \frac{e^{-\|\Sigma_k^{-1/2}(x - m_k)\|^2/2}}{(2\pi)^{d/2} \det(\Sigma_k)^{1/2}}.$$

Here  $C$  is a normalizing constant which ensures that  $\mathcal{T}_\infty \psi = 0$ . In this situation, the parameter  $\theta$  consists of all  $\alpha_k$ 's and all components of  $m_k$ 's and  $\Sigma_k$ 's,  $k \in \{1, \dots, K\}$ . If the smallest eigenvalues of  $\Sigma_1, \dots, \Sigma_K$  are bounded away from zero uniformly over  $k \in \{1, \dots, K\}$ , then  $e^{\psi(x)}$  is bounded. On the other hand, if  $K$  is fixed, there is a component with a weight at least  $1/K$ . Without loss of generality, we assume that it is the first one. Then

$$\psi(x) \geq -C + \log(\alpha_1 \varphi_{m_1, \Sigma_1}(x)) \geq -C - \log K - \frac{1}{2} \left\| \Sigma_1^{-1/2}(x - m_1) \right\|^2,$$

and we conclude that Assumption 3 is satisfied. Verification of the Assumption 4 is straightforward once we assume that the weight of each component is bounded away from zero, and the norms  $\|m_k\|$ ,  $\|\Sigma_k\|$ , and  $\|\Sigma_k^{-1}\|$  are bounded uniformly over  $k \in \{1, \dots, K\}$  (which is the case in [Korotin et al., 2024]). Second, Assumptions 3 and 4 will be fulfilled if one deals, for example, with a class of truncated feedforward neural networks with bounded weights and ReLU activations. It is known that (see [Schmidt-Hieber, 2020, Lemma 5]) they are Lipschitz with respect to each weight, and the Lipschitz constant grows linearly with  $\|x\|$ . More generally, Conforti [2024] analyzed semiconvexity properties of the Schrödinger potentials under rather mild assumptions on the marginals.

We are ready to formulate the main result of this section.

**Theorem 1.** *Let  $\rho_0$  be the density of the standard Gaussian distribution  $\mathcal{N}(0, I_d)$ . Grant Assumptions 1, 2, 3, and 4. Assume that  $T$  is sufficiently large in a sense that*

$$bT \geq (5 + \log d) \vee \log(160b(\mathfrak{v}^2 \vee 1) \|\Sigma^{-1}\|).$$

Let  $\hat{\psi}$  be defined in (3) and let  $\hat{\rho}_T$  be the corresponding density of  $X_T^{\hat{\psi}}$ . Then, for any  $\delta \in (0, 1/2)$ , with probability at least  $1 - 2\delta$ , it holds that

$$\text{KL}(\rho_T^*, \hat{\rho}_T) - \inf_{\psi \in \Psi} \text{KL}(\rho_T^*, \rho_T^\psi) \lesssim \sqrt{\Upsilon(n, \delta) \inf_{\psi \in \Psi} \text{KL}(\rho_T^*, \rho_T^\psi)} + \Upsilon(n, \delta),$$

where

$$\Upsilon(n, \delta) = (\Lambda d + M + d) \left( d + \log \frac{RLn}{\delta} + (M \vee \log \Lambda) \sqrt{d} e^{-bT} \right) \frac{D \log n}{n}.$$

The hidden constant behind  $\lesssim$  depends on  $\Sigma$ ,  $m$ ,  $b$ , and  $\mathfrak{v}$  only.

280 In Theorem 1, we assume that  $\rho_0$  is the density of  $\mathcal{N}(0, I_d)$ . Though it is a standard choice of  
 281 initial distribution in practice, we would like to emphasize that unbounded support of  $\rho_0$  significantly  
 282 complicates the proof and makes the problem even more challenging.

283 The problem of Schrödinger potential estimation was also studied in [Korotin et al., 2024] and  
 284 [Pooladian and Niles-Weed, 2024]. In [Korotin et al., 2024], the authors suggest an algorithm called  
 285 Light Schrödinger Bridge, which is based on minimization of the empirical KL-divergence between  
 286 entropic optimal transport plans. This slightly differs from our setup, since we aim to minimize  
 287 empirical KL-divergence between marginal endpoint distributions. The reason is that Korotin,  
 288 Gushchin, and Burnaev [2024] are motivated by the style transfer task, where the initial distribution  
 289 is also unknown. In contrast, we focus on generative modelling where the initial distribution  $\rho_0$   
 290 is available to learner. In [Korotin et al., 2024, Theorem A.1], the authors consider the case when  
 291 admissible potentials are Gaussian mixtures with  $K$  components. Assuming that both initial and  
 292 finite distributions have a compact support, they prove a  $\mathcal{O}(n^{-1/2})$  upper bound on the Rademacher  
 293 complexity of such class. On the other hand, we allow the support of  $\rho_0$  and  $\rho_T^*$  to be unbounded.  
 294 Besides, the rate of convergence presented in Theorem 1 may be much faster than  $\mathcal{O}(n^{-1/2})$  if the  
 295 target distribution is close to  $\{\rho_T^\psi : \psi \in \Psi\}$ . In the realizable case (that is,  $\rho_T^* \in \{\rho_T^\psi : \psi \in \Psi\}$ ) the  
 296 right-hand side in Theorem 1 becomes  $\mathcal{O}(\log^2 n/n)$ . Finally Theorem 1 provides a high-probability  
 297 upper bound on the excess risk while the result of Korotin et al. [2024] holds in expectation. In  
 298 [Pooladian and Niles-Weed, 2024] the authors study properties of a plug-in Sinkhorn-based estimator.  
 299 Similarly to Korotin et al. [2024], they consider the case of compactly supported initial and target  
 300 measures. However, they assume that these measures are supported on smooth  $k$ -dimensional  
 301 submanifolds. They derive a  $\mathcal{O}(n^{-1/2} + (T - \tau)^{-k-2}n^{-1})$  bound on the squared total variation  
 302 distance between *path measures* up to moment  $\tau < T$ . Unfortunately, the second term grows very  
 303 fast when  $\tau$  approaches  $T$ , and there are no guarantees whether the marginal endpoint distributions  
 304 will be close to each other.

305 In Theorem 1, we focus on the statistical error leaving study of the approximation out of the scope  
 306 of the present paper. The reason is that there are few results on properties of the true log-potential  
 307  $\psi^*(x) = \log(\nu_T(dx)/dx)$ . However, we would like to note that, according to our findings (see  
 308 Lemma B.2 and (5)), if  $\psi^*$  fulfils Assumption 3, then for any  $\psi \in \Psi$  and  $y \in \mathbb{R}^d$

$$\begin{aligned} \log \frac{\rho_T^*(y)}{\rho_T^\psi(y)} &\lesssim |\psi(y) - \psi^*(y)| \\ &\quad + (\mathcal{T}_\infty |\psi - \psi^*|)^{1/\mathcal{K}(T)} \|\Sigma^{-1/2}(y - m)\|^{2-2/\mathcal{K}(T)} e^{\mathcal{O}(e^{-bT} \|\Sigma^{-1/2}(y-m)\|^2)}, \end{aligned}$$

309 where  $1 \leq \mathcal{K}(T) \leq 1 + \mathcal{O}(\sqrt{de^{-bT}})$ . In the proof of Theorem 1 (see Step 4), we show that the  
 310 expectation

$$\mathbb{E}_{Y \sim \rho_T^*} \left\| \Sigma^{-1/2}(Y - m) \right\|^{2-2/\mathcal{K}(T)} e^{\mathcal{O}(e^{-bT} \|\Sigma^{-1/2}(Y-m)\|^2)}$$

311 is finite, provided that  $bT \geq (5 + \log d) \vee \log(160b(\vee^2 \vee 1) \|\Sigma^{-1}\|)$ . This allows us to relate the  
 312 KL-divergence between  $\rho_T^*$  and  $\rho_T^\psi$  with the distances between the corresponding log-potentials:

$$\text{KL}(\rho_T^*, \rho_T^\psi) \lesssim \|\psi - \psi^*\|_{L_1(\rho_T^*)} + (\mathcal{T}_\infty |\psi - \psi^*|)^{1/\mathcal{K}(T)}.$$

## 313 5 Proof sketch of Theorem 1

314 In this section, we discuss main ideas used in the proof of Theorem 1. Rigorous derivations are  
 315 deferred to Appendix A. Since the proof is quite long, we split it into several steps.

316 **Step 1: log-density properties.** Let us note that Assumptions 3 and 4 concern properties of  
 317 log-potentials  $\psi \in \Psi$  while empirical risks include marginal densities  $\rho_T^\psi$ . For this reason, before we  
 318 consider the empirical process

$$\frac{1}{n} \sum_{i=1}^n \log \frac{\rho_T^*(Y_i)}{\rho_T^\psi(Y_i)} - \text{KL}(\rho_T^*, \rho_T^\psi), \quad \psi \in \Psi,$$



we have to study the random variables  $\log(\rho_T^*(Y_i)/\rho_T^\psi(Y_i))$ ,  $1 \leq i \leq n$ . Using basic properties of the Ornstein-Uhlenbeck operator, we show that

$$-\log \rho_T^\psi(y) \lesssim -\psi(y) + \left\| \Sigma^{-1/2}(y - m) \right\|^2.$$

In view of Assumption 3, this means that  $-\log \rho_T^\psi(y)$  grows as fast as a quadratic function. Since the target distribution is sub-Gaussian and has a bounded density, this yields that the random variables  $\log(\rho_T^*(Y_i)/\rho_T^\psi(Y_i))$ ,  $1 \leq i \leq n$ , are sub-exponential. More specifically, applying Lemma C.3 we obtain the following upper bound on their Orlicz norm:

$$\left\| \log \frac{\rho_T^*(Y_i)}{\rho_T^\psi(Y_i)} \right\|_{\psi_1} \lesssim \Lambda d + M + d \quad \text{for all } i \in \{1, \dots, n\}.$$

**Step 2:  $\varepsilon$ -net argument and Bernstein's inequality.** The result obtained on the first step allows us to use concentration inequalities for sub-exponential random variables. Let us fix  $\varepsilon \in (0, R)$  and let  $\Theta_\varepsilon$  stand for the minimal  $\varepsilon$ -net of  $\Theta$  with respect to the  $\ell_\infty$ -norm. We denote the set of corresponding log-potentials by  $\Psi_\varepsilon$ :

$$\Psi_\varepsilon = \{\psi_\theta : \theta \in \Theta_\varepsilon\}.$$

Using Bernstein's inequality for unbounded random variables (see, for instance, [Lecué and Mitchell, 2012, Proposition 5.2]) and the union bound, we obtain that

$$\left| \text{KL}(\rho_T^*, \rho_T^\psi) - \frac{1}{n} \sum_{i=1}^n \log \frac{\rho_T^*(Y_i)}{\rho_T^\psi(Y_i)} \right| \lesssim \sqrt{\text{Var} \left( \log \frac{\rho_T^*(Y_1)}{\rho_T^\psi(Y_1)} \right) \frac{\log(2|\Psi_\varepsilon|/\delta)}{n}} + \frac{(\Lambda d + M + d) \log n \log(2|\Psi_\varepsilon|/\delta)}{n}$$

with probability at least  $(1 - \delta)$  simultaneously for all  $\psi \in \Psi_\varepsilon$ .

**Step 3: bounding the loss variance.** One of the key ingredients in the proof of Theorem 1, which allows us to hope for faster rates of convergence than  $\mathcal{O}(n^{-1/2})$ , is analysis of the variance of  $\log(\rho_T^*(Y_1)/\rho_T^\psi(Y_1))$ ,  $\psi \in \Psi$ . Despite the fact that the admissible log-potentials may be unbounded, we are still able to show that the class  $\Psi$  satisfies a Bernstein-type condition

$$\text{Var} \left( \log \frac{\rho_T^*(Y_1)}{\rho_T^\psi(Y_1)} \right) \lesssim (\Lambda d + M + d) \log n \left( \text{KL}(\rho_T^*, \rho_T^\psi) + \frac{1}{n} \right).$$

**Steps 4 and 5: from  $\varepsilon$ -net to a uniform Bernstein-type bound.** The hardest and technically involved part of the proof is to show that the losses  $\log(\rho_T^*(y)/\rho_T^\psi(y))$  and  $\log(\rho_T^*(y)/\rho_T^\phi(y))$  do not differ too much, once the corresponding log-potentials  $\psi$  and  $\phi$  are close to each other. This follows from Lemma B.2, which relies on properties of the Ornstein-Uhlenbeck operator established in and Lemma B.3. We would like to note that the unbounded support of the initial density  $\rho_0$  significantly complicates the proof of Lemma B.2. Nevertheless, we prove that

$$\log \frac{\rho_T^\psi(y)}{\rho_T^\phi(y)} \lesssim |\psi(y) - \phi(y)| + (\mathcal{T}_\infty |\psi - \phi|)^{1/\mathcal{K}(T)} \left\| \Sigma^{-1/2}(y - m) \right\|^{2-2/\mathcal{K}(T)} e^{\mathcal{O}(e^{-bT} \left\| \Sigma^{-1/2}(y - m) \right\|^2)},$$

where  $1 \leq \mathcal{K}(T) \leq 1 + \mathcal{O}(\sqrt{d}e^{-bT})$ . Though the right-hand side depends exponentially on the squared norm of  $\Sigma^{-1/2}(y - m)$ , the coefficient  $\mathcal{O}(e^{-bT})$  is quite small, which is enough for our purposes.

**Steps 6 and 7: choice of  $\varepsilon$  and the final bound.** The rest of the proof is quite standard. On Step 6, we choose an appropriate  $\varepsilon$  and obtain a uniform Bernstein-type inequality

$$\text{KL}(\rho_T^*, \rho_T^\psi) - \frac{1}{n} \sum_{i=1}^n \log \frac{\rho_T^*(Y_i)}{\rho_T^\psi(Y_i)} \lesssim \sqrt{\Upsilon(n, \delta) \text{KL}(\rho_T^*, \rho_T^\psi)} + \Upsilon(n, \delta),$$

where

$$\Upsilon(n, \delta) = (\Lambda d + M + d) \left( d + \log \frac{RLn}{\delta} + (M \vee \log \Lambda) \sqrt{d} e^{-bT} \right) \frac{D \log n}{n},$$

which holds simultaneously for all  $\psi \in \Psi$  with probability at least  $(1 - 2\delta)$ . After that, we transform it into the desired excess risk bound and finish the proof.

## References

- R. Baptista, A.-A. Pooladian, M. Brennan, Y. Marzouk, and J. Niles-Weed. Conditional simulation via entropic optimal transport: Toward non-parametric estimation of conditional Brenier maps. *arXiv preprint arXiv:2411.07154*, 2024.
- A. Beurling. An automorphism of product measures. *Ann. Math. (2)*, 72:189–200, 1960. ISSN 0003-486X. doi: 10.2307/1970151.
- C. Bunne, Y.-P. Hsieh, M. Cuturi, and A. Krause. The Schrödinger bridge between gaussian measures has a closed form. In *International Conference on Artificial Intelligence and Statistics*, pages 5802–5833. PMLR, 2023.
- Y. Chen, T. Georgiou, and M. Pavon. Entropic and displacement interpolation: a computational approach using the Hilbert metric. *SIAM Journal on Applied Mathematics*, 76(6):2375–2396, 2016.
- Y. Chen, T. T. Georgiou, and M. Pavon. Stochastic control liaisons: Richard Sinkhorn meets Gaspard Monge on a Schrödinger bridge. *Siam Review*, 63(2):249–313, 2021.
- A. Chiarini, G. Conforti, G. Greco, and L. Tamanini. A semiconcavity approach to stability of entropic plans and exponential convergence of Sinkhorn’s algorithm, 2024. URL <https://arxiv.org/abs/2412.09235>.
- G. Conforti. Weak semiconvexity estimates for Schrödinger potentials and logarithmic Sobolev inequality for Schrödinger bridges, 2024. URL <https://arxiv.org/abs/2301.00083>.
- G. Conforti, A. Durmus, and G. Greco. Quantitative contraction rates for Sinkhorn algorithm: beyond bounded costs and compact marginals, 2024. URL <https://arxiv.org/abs/2304.04451>.
- P. Dai Pra. A stochastic control approach to reciprocal diffusion processes. *Applied Mathematics and Optimization*, 23(1):313–329, 1991. doi: 10.1007/BF01445134.
- V. De Bortoli, J. Thornton, J. Heng, and A. Doucet. Diffusion Schrödinger bridge with applications to score-based generative modeling. *Advances in Neural Information Processing Systems*, 34: 17695–17709, 2021.
- S. Eckstein. Hilbert’s projective metric for functions of bounded growth and exponential convergence of Sinkhorn’s algorithm. *Probability Theory and Related Fields*, pages 1–37, 2025.
- R. Fortet. Résolution d’un système d’équations de M. Schrödinger. *J. Math. Pures Appl. (9)*, 19: 83–105, 1940. ISSN 0021-7824.
- A. Genevay, G. Peyré, and M. Cuturi. Learning generative models with Sinkhorn divergences. In *International Conference on Artificial Intelligence and Statistics*, pages 1608–1617. PMLR, 2018.
- N. Gushchin, S. Kholkin, E. Burnaev, and A. Korotin. Light and optimal Schrödinger bridge matching. In *Forty-first International Conference on Machine Learning*, 2024a. URL <https://doi.org/10.48550/arXiv.2402.03207>.
- N. Gushchin, D. Selikhanovych, S. Kholkin, E. Burnaev, and A. Korotin. Adversarial Schrödinger bridge matching. In *The Thirty-eighth Annual Conference on Neural Information Processing Systems*, 2024b. URL <https://arxiv.org/abs/2405.14449>.
- B. Jamison. Reciprocal processes. *Zeitschrift für Wahrscheinlichkeitstheorie und Verwandte Gebiete*, 30(1):65–86, 1974.
- H. Janati, B. Muzellec, G. Peyré, and M. Cuturi. Entropic optimal transport between unbalanced gaussian measures has a closed form. In *Advances in Neural Information Processing Systems*, volume 33, pages 10468–10479. Curran Associates, Inc., 2020. URL [https://proceedings.neurips.cc/paper\\_files/paper/2020/file/766e428d1e232bbdd58664b41346196c-Paper.pdf](https://proceedings.neurips.cc/paper_files/paper/2020/file/766e428d1e232bbdd58664b41346196c-Paper.pdf).
- A. Korotin, N. Gushchin, and E. Burnaev. Light Schrödinger bridge. In *The Twelfth International Conference on Learning Representations*, 2024. URL <https://doi.org/10.48550/arXiv.2310.01174>.

397 G. Lecué and C. Mitchell. Oracle inequalities for cross-validation type procedures. *Electronic Journal*  
398 *of Statistics*, 6(none):1803 – 1837, 2012. doi: 10.1214/12-EJS730. URL [https://doi.org/10.](https://doi.org/10.1214/12-EJS730)  
399 1214/12-EJS730.

400 C. Leonard. A survey of the Schrödinger problem and some of its connections with optimal transport.  
401 *Discrete and Continuous Dynamical Systems*, 34(4):1533–1574, 2014.

402 G.-H. Liu, A. Vahdat, D.-A. Huang, E. A. Theodorou, W. Nie, and A. Anandkumar. I<sup>2</sup>SB: image-to-  
403 image Schrödinger bridge. In *Fortieth International Conference on Machine Learning*, 2023. URL  
404 <https://doi.org/10.48550/arXiv.2302.05872>.

405 H. D. March and P. Henry-Labordere. Building arbitrage-free implied volatility: Sinkhorn’s algorithm  
406 and variants, 2023. URL <https://arxiv.org/abs/1902.04456>.

407 M. Pavon, G. Trigila, and E. G. Tabak. The data-driven Schrödinger bridge. *Communications on*  
408 *Pure and Applied Mathematics*, 74(7):1545–1573, 2021.

409 S. Peluchetti. Diffusion bridge mixture transports, Schrödinger bridge problems and generative  
410 modeling. *Journal of Machine Learning Research*, 24(374):1–51, 2023.

411 A.-A. Pooladian and J. Niles-Weed. Plug-in estimation of Schrödinger bridges. *arXiv preprint*  
412 *arXiv:2408.11686*, 2024.

413 G. Rapakoulias, A. R. Pedram, and P. Tsiotras. Go With the Flow: Fast Diffusion for Gaussian  
414 Mixture Models. Preprint. ArXiv:2412.09059v3, 2024.

415 P. Rigollet and J.-C. Hütter. High-dimensional statistics. Preprint. ArXiv:2310.19244, 2023.

416 J. Schmidt-Hieber. Nonparametric regression using deep neural networks with ReLU activation  
417 function. *The Annals of Statistics*, 48(4):1875–1897, 2020.

418 E. Schrödinger. Über die Umkehrung der Naturgesetze. *Sitzungsberichte der Preussischen Akademie*  
419 *der Wissenschaften, Physikalisch-Mathematische Klasse*, pages 144–153, 1932.

420 Y. Shi, V. De Bortoli, A. Campbell, and A. Doucet. Diffusion Schrödinger bridge matching. *arXiv*  
421 *preprint arXiv:2303.16852*, 2023.

422 M. G. Silveri, A. O. Durmus, and G. Conforti. Theoretical guarantees in KL for diffusion flow  
423 matching. In *The Thirty-eighth Annual Conference on Neural Information Processing Systems*,  
424 2024. URL <https://openreview.net/forum?id=ia4WUCwHA9>.

425 R. Sinkhorn. Diagonal equivalence to matrices with prescribed row and column sums. *The American*  
426 *Mathematical Monthly*, 74(4):402–405, 1967. ISSN 00029890, 19300972. URL [http://www.](http://www.jstor.org/stable/2314570)  
427 [jstor.org/stable/2314570](http://www.jstor.org/stable/2314570).

428 A. Stromme. Sampling from a Schrödinger bridge. In F. Ruiz, J. Dy, and J.-W. van de Meent, editors,  
429 *Proceedings of The 26th International Conference on Artificial Intelligence and Statistics*, volume  
430 206 of *Proceedings of Machine Learning Research*, pages 4058–4067. PMLR, 25–27 Apr 2023.  
431 URL <https://proceedings.mlr.press/v206/stromme23a.html>.

432 B. Tzen and M. Raginsky. Theoretical guarantees for sampling and inference in generative models  
433 with latent diffusions. In *Conference on Learning Theory*, pages 3084–3114. PMLR, 2019.

434 F. Vargas, P. Thodoroff, A. Lamacraft, and N. Lawrence. Solving Schrödinger bridges via maximum  
435 likelihood. *Entropy*, 23(9):1134, 2021.

436 R. Vershynin. *High-Dimensional Probability: An Introduction with Applications in Data Science*.  
437 Cambridge Series in Statistical and Probabilistic Mathematics. Cambridge University Press, 2018.

438 G. Wang, Y. Jiao, Q. Xu, Y. Wang, and C. Yang. Deep generative learning via Schrödinger bridge. In  
439 *International conference on machine learning*, pages 10794–10804. PMLR, 2021.

440 Q. Zhang and Y. Chen. Path integral sampler: A stochastic control approach for sampling. In  
441 *International Conference on Learning Representations*, 2022. URL [https://doi.org/10.](https://doi.org/10.48550/arXiv.2111.15141)  
442 48550/arXiv.2111.15141.

## NeurIPS Paper Checklist

### 1. Claims

Question: Do the main claims made in the abstract and introduction accurately reflect the paper's contributions and scope?

Answer: [\[Yes\]](#)

Justification: The main result Theorem 1 fully corresponds to that stated in the Abstract and Introduction, confirming the specified Contribution of the article.

Guidelines:

- The answer NA means that the abstract and introduction do not include the claims made in the paper.
- The abstract and/or introduction should clearly state the claims made, including the contributions made in the paper and important assumptions and limitations. A No or NA answer to this question will not be perceived well by the reviewers.
- The claims made should match theoretical and experimental results, and reflect how much the results can be expected to generalize to other settings.
- It is fine to include aspirational goals as motivation as long as it is clear that these goals are not attained by the paper.

### 2. Limitations

Question: Does the paper discuss the limitations of the work performed by the authors?

Answer: [\[Yes\]](#)

Justification: The assumptions we impose are discussed in Section 4 of the paper.

Guidelines:

- The answer NA means that the paper has no limitation while the answer No means that the paper has limitations, but those are not discussed in the paper.
- The authors are encouraged to create a separate "Limitations" section in their paper.
- The paper should point out any strong assumptions and how robust the results are to violations of these assumptions (e.g., independence assumptions, noiseless settings, model well-specification, asymptotic approximations only holding locally). The authors should reflect on how these assumptions might be violated in practice and what the implications would be.
- The authors should reflect on the scope of the claims made, e.g., if the approach was only tested on a few datasets or with a few runs. In general, empirical results often depend on implicit assumptions, which should be articulated.
- The authors should reflect on the factors that influence the performance of the approach. For example, a facial recognition algorithm may perform poorly when image resolution is low or images are taken in low lighting. Or a speech-to-text system might not be used reliably to provide closed captions for online lectures because it fails to handle technical jargon.
- The authors should discuss the computational efficiency of the proposed algorithms and how they scale with dataset size.
- If applicable, the authors should discuss possible limitations of their approach to address problems of privacy and fairness.
- While the authors might fear that complete honesty about limitations might be used by reviewers as grounds for rejection, a worse outcome might be that reviewers discover limitations that aren't acknowledged in the paper. The authors should use their best judgment and recognize that individual actions in favor of transparency play an important role in developing norms that preserve the integrity of the community. Reviewers will be specifically instructed to not penalize honesty concerning limitations.

### 3. Theory assumptions and proofs

Question: For each theoretical result, does the paper provide the full set of assumptions and a complete (and correct) proof?

Answer: [\[Yes\]](#)

Justification: For the main result and auxiliary results, the assumptions are explicitly stated in Section 4. For Theorem 1, a sketch of the proof is given in Section 5, and references are given to auxiliary results in the Appendix, which are also completely proved.

Guidelines:

- The answer NA means that the paper does not include theoretical results.
- All the theorems, formulas, and proofs in the paper should be numbered and cross-referenced.
- All assumptions should be clearly stated or referenced in the statement of any theorems.
- The proofs can either appear in the main paper or the supplemental material, but if they appear in the supplemental material, the authors are encouraged to provide a short proof sketch to provide intuition.
- Inversely, any informal proof provided in the core of the paper should be complemented by formal proofs provided in appendix or supplemental material.
- Theorems and Lemmas that the proof relies upon should be properly referenced.

#### 4. Experimental result reproducibility

Question: Does the paper fully disclose all the information needed to reproduce the main experimental results of the paper to the extent that it affects the main claims and/or conclusions of the paper (regardless of whether the code and data are provided or not)?

Answer: [NA]

Justification: The paper does not include numerical experiments and presents a theoretical derivation of a statistical bound, therefore the question about reproducibility does not apply to it.

Guidelines:

- The answer NA means that the paper does not include experiments.
- If the paper includes experiments, a No answer to this question will not be perceived well by the reviewers: Making the paper reproducible is important, regardless of whether the code and data are provided or not.
- If the contribution is a dataset and/or model, the authors should describe the steps taken to make their results reproducible or verifiable.
- Depending on the contribution, reproducibility can be accomplished in various ways. For example, if the contribution is a novel architecture, describing the architecture fully might suffice, or if the contribution is a specific model and empirical evaluation, it may be necessary to either make it possible for others to replicate the model with the same dataset, or provide access to the model. In general, releasing code and data is often one good way to accomplish this, but reproducibility can also be provided via detailed instructions for how to replicate the results, access to a hosted model (e.g., in the case of a large language model), releasing of a model checkpoint, or other means that are appropriate to the research performed.
- While NeurIPS does not require releasing code, the conference does require all submissions to provide some reasonable avenue for reproducibility, which may depend on the nature of the contribution. For example
  - (a) If the contribution is primarily a new algorithm, the paper should make it clear how to reproduce that algorithm.
  - (b) If the contribution is primarily a new model architecture, the paper should describe the architecture clearly and fully.
  - (c) If the contribution is a new model (e.g., a large language model), then there should either be a way to access this model for reproducing the results or a way to reproduce the model (e.g., with an open-source dataset or instructions for how to construct the dataset).
  - (d) We recognize that reproducibility may be tricky in some cases, in which case authors are welcome to describe the particular way they provide for reproducibility. In the case of closed-source models, it may be that access to the model is limited in some way (e.g., to registered users), but it should be possible for other researchers to have some path to reproducing or verifying the results.

## 5. Open access to data and code

Question: Does the paper provide open access to the data and code, with sufficient instructions to faithfully reproduce the main experimental results, as described in supplemental material?

Answer: [NA]

Justification: The paper does not include numerical experiments and presents a theoretical derivation of a statistical bound.

Guidelines:

- The answer NA means that paper does not include experiments requiring code.
- Please see the NeurIPS code and data submission guidelines (<https://nips.cc/public/guides/CodeSubmissionPolicy>) for more details.
- While we encourage the release of code and data, we understand that this might not be possible, so “No” is an acceptable answer. Papers cannot be rejected simply for not including code, unless this is central to the contribution (e.g., for a new open-source benchmark).
- The instructions should contain the exact command and environment needed to run to reproduce the results. See the NeurIPS code and data submission guidelines (<https://nips.cc/public/guides/CodeSubmissionPolicy>) for more details.
- The authors should provide instructions on data access and preparation, including how to access the raw data, preprocessed data, intermediate data, and generated data, etc.
- The authors should provide scripts to reproduce all experimental results for the new proposed method and baselines. If only a subset of experiments are reproducible, they should state which ones are omitted from the script and why.
- At submission time, to preserve anonymity, the authors should release anonymized versions (if applicable).
- Providing as much information as possible in supplemental material (appended to the paper) is recommended, but including URLs to data and code is permitted.

## 6. Experimental setting/details

Question: Does the paper specify all the training and test details (e.g., data splits, hyperparameters, how they were chosen, type of optimizer, etc.) necessary to understand the results?

Answer: [NA]

Justification: The paper does not include numerical experiments and presents a theoretical derivation of a statistical bound.

Guidelines:

- The answer NA means that the paper does not include experiments.
- The experimental setting should be presented in the core of the paper to a level of detail that is necessary to appreciate the results and make sense of them.
- The full details can be provided either with the code, in appendix, or as supplemental material.

## 7. Experiment statistical significance

Question: Does the paper report error bars suitably and correctly defined or other appropriate information about the statistical significance of the experiments?

Answer: [NA]

Justification: The paper does not include numerical experiments and presents a theoretical derivation of a statistical bound.

Guidelines:

- The answer NA means that the paper does not include experiments.
- The authors should answer "Yes" if the results are accompanied by error bars, confidence intervals, or statistical significance tests, at least for the experiments that support the main claims of the paper.

- The factors of variability that the error bars are capturing should be clearly stated (for example, train/test split, initialization, random drawing of some parameter, or overall run with given experimental conditions).
- The method for calculating the error bars should be explained (closed form formula, call to a library function, bootstrap, etc.)
- The assumptions made should be given (e.g., Normally distributed errors).
- It should be clear whether the error bar is the standard deviation or the standard error of the mean.
- It is OK to report 1-sigma error bars, but one should state it. The authors should preferably report a 2-sigma error bar than state that they have a 96% CI, if the hypothesis of Normality of errors is not verified.
- For asymmetric distributions, the authors should be careful not to show in tables or figures symmetric error bars that would yield results that are out of range (e.g. negative error rates).
- If error bars are reported in tables or plots, The authors should explain in the text how they were calculated and reference the corresponding figures or tables in the text.

## 8. Experiments compute resources

Question: For each experiment, does the paper provide sufficient information on the computer resources (type of compute workers, memory, time of execution) needed to reproduce the experiments?

Answer: [NA]

Justification: The paper does not include numerical experiments and presents a theoretical derivation of a statistical bound.

Guidelines:

- The answer NA means that the paper does not include experiments.
- The paper should indicate the type of compute workers CPU or GPU, internal cluster, or cloud provider, including relevant memory and storage.
- The paper should provide the amount of compute required for each of the individual experimental runs as well as estimate the total compute.
- The paper should disclose whether the full research project required more compute than the experiments reported in the paper (e.g., preliminary or failed experiments that didn't make it into the paper).

## 9. Code of ethics

Question: Does the research conducted in the paper conform, in every respect, with the NeurIPS Code of Ethics <https://neurips.cc/public/EthicsGuidelines>?

Answer: [Yes]

Justification: This paper is of purely theoretical nature, and the proposed methods do not deal with sensitive attributes that could induce unfairness or privacy issues.

Guidelines:

- The answer NA means that the authors have not reviewed the NeurIPS Code of Ethics.
- If the authors answer No, they should explain the special circumstances that require a deviation from the Code of Ethics.
- The authors should make sure to preserve anonymity (e.g., if there is a special consideration due to laws or regulations in their jurisdiction).

## 10. Broader impacts

Question: Does the paper discuss both potential positive societal impacts and negative societal impacts of the work performed?

Answer: [NA]

Justification: This article does not have a direct social impact on society, as it is of theoretical nature. We are not aware of any cases where high-probability upper bound on the KL-divergence has a strong social impact on society.

Guidelines:

- The answer NA means that there is no societal impact of the work performed.
- If the authors answer NA or No, they should explain why their work has no societal impact or why the paper does not address societal impact.
- Examples of negative societal impacts include potential malicious or unintended uses (e.g., disinformation, generating fake profiles, surveillance), fairness considerations (e.g., deployment of technologies that could make decisions that unfairly impact specific groups), privacy considerations, and security considerations.
- The conference expects that many papers will be foundational research and not tied to particular applications, let alone deployments. However, if there is a direct path to any negative applications, the authors should point it out. For example, it is legitimate to point out that an improvement in the quality of generative models could be used to generate deepfakes for disinformation. On the other hand, it is not needed to point out that a generic algorithm for optimizing neural networks could enable people to train models that generate Deepfakes faster.
- The authors should consider possible harms that could arise when the technology is being used as intended and functioning correctly, harms that could arise when the technology is being used as intended but gives incorrect results, and harms following from (intentional or unintentional) misuse of the technology.
- If there are negative societal impacts, the authors could also discuss possible mitigation strategies (e.g., gated release of models, providing defenses in addition to attacks, mechanisms for monitoring misuse, mechanisms to monitor how a system learns from feedback over time, improving the efficiency and accessibility of ML).

## 11. Safeguards

Question: Does the paper describe safeguards that have been put in place for responsible release of data or models that have a high risk for misuse (e.g., pretrained language models, image generators, or scraped datasets)?

Answer: [NA]

Justification: This article does not contain anything that would require this kind of protection.

Guidelines:

- The answer NA means that the paper poses no such risks.
- Released models that have a high risk for misuse or dual-use should be released with necessary safeguards to allow for controlled use of the model, for example by requiring that users adhere to usage guidelines or restrictions to access the model or implementing safety filters.
- Datasets that have been scraped from the Internet could pose safety risks. The authors should describe how they avoided releasing unsafe images.
- We recognize that providing effective safeguards is challenging, and many papers do not require this, but we encourage authors to take this into account and make a best faith effort.

## 12. Licenses for existing assets

Question: Are the creators or original owners of assets (e.g., code, data, models), used in the paper, properly credited and are the license and terms of use explicitly mentioned and properly respected?

Answer: [NA]

Justification: This article does not contain any existing assets that need to be referenced.

Guidelines:

- The answer NA means that the paper does not use existing assets.
- The authors should cite the original paper that produced the code package or dataset.
- The authors should state which version of the asset is used and, if possible, include a URL.
- The name of the license (e.g., CC-BY 4.0) should be included for each asset.



- For scraped data from a particular source (e.g., website), the copyright and terms of service of that source should be provided.
- If assets are released, the license, copyright information, and terms of use in the package should be provided. For popular datasets, [paperswithcode.com/datasets](https://paperswithcode.com/datasets) has curated licenses for some datasets. Their licensing guide can help determine the license of a dataset.
- For existing datasets that are re-packaged, both the original license and the license of the derived asset (if it has changed) should be provided.
- If this information is not available online, the authors are encouraged to reach out to the asset's creators.

### 13. New assets

Question: Are new assets introduced in the paper well documented and is the documentation provided alongside the assets?

Answer: [NA]

Justification: This article does not contain any new assets that would fit this question.

Guidelines:

- The answer NA means that the paper does not release new assets.
- Researchers should communicate the details of the dataset/code/model as part of their submissions via structured templates. This includes details about training, license, limitations, etc.
- The paper should discuss whether and how consent was obtained from people whose asset is used.
- At submission time, remember to anonymize your assets (if applicable). You can either create an anonymized URL or include an anonymized zip file.

### 14. Crowdsourcing and research with human subjects

Question: For crowdsourcing experiments and research with human subjects, does the paper include the full text of instructions given to participants and screenshots, if applicable, as well as details about compensation (if any)?

Answer: [NA]

Justification: This paper does not involve crowdsourcing nor research with human subjects, as it is theoretical in nature.

Guidelines:

- The answer NA means that the paper does not involve crowdsourcing nor research with human subjects.
- Including this information in the supplemental material is fine, but if the main contribution of the paper involves human subjects, then as much detail as possible should be included in the main paper.
- According to the NeurIPS Code of Ethics, workers involved in data collection, curation, or other labor should be paid at least the minimum wage in the country of the data collector.

### 15. Institutional review board (IRB) approvals or equivalent for research with human subjects

Question: Does the paper describe potential risks incurred by study participants, whether such risks were disclosed to the subjects, and whether Institutional Review Board (IRB) approvals (or an equivalent approval/review based on the requirements of your country or institution) were obtained?

Answer: [NA]

Justification: This paper does not involve crowdsourcing nor research with human subjects, as it is of theoretical nature.

Guidelines:

- The answer NA means that the paper does not involve crowdsourcing nor research with human subjects.

- 755 • Depending on the country in which research is conducted, IRB approval (or equivalent)  
756 may be required for any human subjects research. If you obtained IRB approval, you  
757 should clearly state this in the paper.
- 758 • We recognize that the procedures for this may vary significantly between institutions  
759 and locations, and we expect authors to adhere to the NeurIPS Code of Ethics and the  
760 guidelines for their institution.
- 761 • For initial submissions, do not include any information that would break anonymity (if  
762 applicable), such as the institution conducting the review.

#### 763 16. **Declaration of LLM usage**

764 Question: Does the paper describe the usage of LLMs if it is an important, original, or  
765 non-standard component of the core methods in this research? Note that if the LLM is used  
766 only for writing, editing, or formatting purposes and does not impact the core methodology,  
767 scientific rigorousness, or originality of the research, declaration is not required.

768 Answer: [NA]

769 Justification: LLMs were not used in core method development in this research. We used  
770 LLM writing and editing purposes only.

771 Guidelines:

- 772 • The answer NA means that the core method development in this research does not  
773 involve LLMs as any important, original, or non-standard components.
- 774 • Please refer to our LLM policy (<https://neurips.cc/Conferences/2025/LLM>)  
775 for what should or should not be described.

|     |                                                         |           |
|-----|---------------------------------------------------------|-----------|
| 776 | <b>Contents</b>                                         |           |
| 777 | <b>1 Introduction</b>                                   | <b>1</b>  |
| 778 | <b>2 Related work</b>                                   | <b>4</b>  |
| 779 | <b>3 Preliminaries and notations</b>                    | <b>5</b>  |
| 780 | <b>4 Main result</b>                                    | <b>6</b>  |
| 781 | <b>5 Proof sketch of Theorem 1</b>                      | <b>8</b>  |
| 782 | <b>A Proof of Theorem 1</b>                             | <b>20</b> |
| 783 | <b>B Properties of the Ornstein-Uhlenbeck operator</b>  | <b>26</b> |
| 784 | B.1 Proof of Lemma B.1 . . . . .                        | 28        |
| 785 | B.2 Proof of Lemma B.2 . . . . .                        | 29        |
| 786 | B.3 Proof of Lemma B.3 . . . . .                        | 38        |
| 787 | <b>C Properties of subquadratic log-densities</b>       | <b>44</b> |
| 788 | C.1 Proof of Lemma C.1 . . . . .                        | 45        |
| 789 | C.2 Proof of Lemma C.2 . . . . .                        | 46        |
| 790 | C.3 Proof of Lemma C.3 . . . . .                        | 47        |
| 791 | <b>D Auxiliary results</b>                              | <b>48</b> |
| 792 | D.1 Proof of Lemma D.1 . . . . .                        | 49        |
| 793 | D.2 Proof of Lemma D.2 . . . . .                        | 51        |
| 794 | D.3 Proof of Lemma D.3 . . . . .                        | 52        |
| 795 | <b>E On Schrödinger potentials in the Gaussian case</b> | <b>53</b> |
| 796 | E.1 Proof of Proposition E.1 . . . . .                  | 54        |

## 797 A Proof of Theorem 1

798 The proof of our main result is quite cumbersome. For this reason, we split it into several steps. We  
799 hope that a reader will find it more convenient.

800 **Step 1: log-density properties.** Before we move to the study of the empirical process

$$\frac{1}{n} \sum_{i=1}^n \log \frac{\rho_T^*(Y_i)}{\rho_T^\psi(Y_i)} - \text{KL}(\rho_T^*, \rho_T^\psi), \quad \psi \in \Psi,$$

801 let us fix a log-potential  $\psi \in \Psi$  and consider the corresponding marginal density  $\rho_T^\psi$ . Since, according  
802 to Assumption 3,  $\psi(x)$  does not exceed  $M$  for all  $x \in \mathbb{R}^d$ , we can apply Lemma B.1 claiming that

$$\psi(y) - \log \rho_T^\psi(y) \leq \frac{2b}{1 - e^{-2bT}} \left\| \Sigma^{-1/2}(y - m) \right\|^2 + \mathcal{O}(M + d).$$

803 This and the upper bound  $\rho_T^*(y) \leq \rho_{\max}$  yield that

$$\log \frac{\rho_T^*(y)}{\rho_T^\psi(y)} \leq \log \rho_{\max} - \psi(y) + \frac{2b}{1 - e^{-2bT}} \left\| \Sigma^{-1/2}(y - m) \right\|^2 + \mathcal{O}(M + d).$$

804 Since  $\psi(y) \geq -\Lambda \|y\|^2 - M$  due to Assumption 3, we obtain that

$$\begin{aligned} \log \frac{\rho_T^*(y)}{\rho_T^\psi(y)} &\leq \Lambda \|y\|^2 + M + \frac{2b \|\Sigma^{-1}\|}{1 - e^{-2bT}} \left\| (y - m) \right\|^2 + \mathcal{O}(M + d) \\ &\leq \left( \Lambda + \frac{4b \|\Sigma^{-1}\|}{1 - e^{-2bT}} \right) \|y\|^2 + \mathcal{O}(M + d). \end{aligned} \quad (7)$$

805 The hidden constant in the right-hand side of (7) depends on  $\rho_{\max}$ . Besides, in the last line, we used  
806 the Cauchy-Schwarz inequality  $\|y - m\|^2 \leq 2\|y\|^2 + 2\|m\|^2$ . The inequality (7) ensures that the  
807 conditions of Lemma C.3 are fulfilled. Applying this lemma with  $A = \Lambda + 4b \|\Sigma^{-1}\|/(1 - e^{-2bT})$   
808 and  $B = \mathcal{O}(M + d)$ , we obtain that

$$\left\| \log \frac{\rho_T^*(Y_i)}{\rho_T^\psi(Y_i)} \right\|_{\psi_1} \lesssim \Lambda d + M + d \quad \text{for all } i \in \{1, \dots, n\}, \quad (8)$$

809 where the hidden constant behind  $\mathcal{O}(\cdot)$  depends on  $\rho_{\max}$  and  $v^2$ . The bound (8) on the Orlicz norm  
810 of  $\log(\rho_T^*(Y_i)/\rho_T^\psi(Y_i))$ ,  $i \in \{1, \dots, n\}$ , plays a crucial role in our analysis, because it allows us to  
811 use properties of sub-exponential random variables.

812 **Step 2:  $\varepsilon$ -net argument and Bernstein's inequality.** Let  $\varepsilon \in (0, 1)$  be a parameter to be specified  
813 a bit later. Let  $\Theta_\varepsilon$  stand for the minimal  $\varepsilon$ -net of  $\Theta$  with respect to the  $\ell_\infty$ -norm and let us introduce

$$\Psi_\varepsilon = \{\psi_\theta : \theta \in \Theta_\varepsilon\}.$$

814 Since  $\Theta \subseteq [-R, R]^D$ , it is known that

$$|\Psi_\varepsilon| \leq |\Theta_\varepsilon| \leq \left( \frac{2R}{\varepsilon} \right)^D.$$

815 In view of (8), we can use Bernstein's inequality for unbounded random variables. According  
816 to [Lecué and Mitchell, 2012, Proposition 5.2]), for any fixed  $\psi \in \Psi_\varepsilon$ , with probability at least  
817  $1 - \delta/|\Psi_\varepsilon|$  it holds that

$$\begin{aligned} \left| \text{KL}(\rho_T^*, \rho_T^\psi) - \frac{1}{n} \sum_{i=1}^n \log \frac{\rho_T^*(Y_i)}{\rho_T^\psi(Y_i)} \right| &\lesssim \sqrt{\text{Var} \left( \log \frac{\rho_T^*(Y_1)}{\rho_T^\psi(Y_1)} \right) \frac{\log(2|\Psi_\varepsilon|/\delta)}{n}} \\ &\quad + \left\| \max_{1 \leq i \leq n} \left\{ \log \frac{\rho_T^*(Y_i)}{\rho_T^\psi(Y_i)} - \text{KL}(\rho_T^*, \rho_T^\psi) \right\} \right\|_{\psi_1} \frac{\log(2|\Psi_\varepsilon|/\delta)}{n}, \end{aligned}$$

818 where  $\lesssim$  stands for an inequality up to an absolute constant. The union bound yields that there is an  
819 event  $\mathcal{E}_0$  such that  $\mathbb{P}(\mathcal{E}_0) \geq 1 - \delta$  and

$$\begin{aligned} \left| \text{KL}(\rho_T^*, \rho_T^\psi) - \frac{1}{n} \sum_{i=1}^n \log \frac{\rho_T^*(Y_i)}{\rho_T^\psi(Y_i)} \right| &\lesssim \sqrt{\text{Var} \left( \log \frac{\rho_T^*(Y_1)}{\rho_T^\psi(Y_1)} \right) \frac{\log(2|\Psi_\varepsilon|/\delta)}{n}} \\ &\quad + \left\| \max_{1 \leq i \leq n} \left\{ \log \frac{\rho_T^*(Y_i)}{\rho_T^\psi(Y_i)} - \text{KL}(\rho_T^*, \rho_T^\psi) \right\} \right\|_{\psi_1} \frac{\log(2|\Psi_\varepsilon|/\delta)}{n} \end{aligned}$$

820 simultaneously for all  $\psi \in \Psi_\varepsilon$  on  $\mathcal{E}_0$ . Using Pisier's inequality (see, for example, [Lecué and Mitchell,  
821 2012, p. 1827]) and the triangle inequality, one can show that

$$\begin{aligned} \left\| \max_{1 \leq i \leq n} \left\{ \log \frac{\rho_T^*(Y_i)}{\rho_T^\psi(Y_i)} - \text{KL}(\rho_T^*, \rho_T^\psi) \right\} \right\|_{\psi_1} &\lesssim \log n \left\| \log \frac{\rho_T^*(Y_1)}{\rho_T^\psi(Y_1)} - \text{KL}(\rho_T^*, \rho_T^\psi) \right\|_{\psi_1} \\ &\lesssim \log n \left\| \log \frac{\rho_T^*(Y_1)}{\rho_T^\psi(Y_1)} \right\|_{\psi_1} + \text{KL}(\rho_T^*, \rho_T^\psi) \log n. \end{aligned}$$

822 In view of (8), we obtain that

$$\left\| \max_{1 \leq i \leq n} \left\{ \log \frac{\rho_T^*(Y_i)}{\rho_T^\psi(Y_i)} - \text{KL}(\rho_T^*, \rho_T^\psi) \right\} \right\|_{\psi_1} \lesssim \log n (\Lambda d + M + d + \text{KL}(\rho_T^*, \rho_T^\psi)).$$

823 On the other hand, the Kullback-Leibler divergence between  $\rho_T^*$  and  $\rho_T^\psi$  is the expectation of the  
824 random variable  $\log(\rho_T^*(Y_1)/\rho_T^\psi(Y_1))$  with a finite  $\psi_1$ -norm. This means that (see [Vershynin, 2018,  
825 Proposition 2.7.1])

$$\text{KL}(\rho_T^*, \rho_T^\psi) = \mathbb{E}_{Y_1 \sim \rho_T^*} \log \frac{\rho_T^*(Y_1)}{\rho_T^\psi(Y_1)} \leq \mathbb{E}_{Y_1 \sim \rho_T^*} \left| \log \frac{\rho_T^*(Y_1)}{\rho_T^\psi(Y_1)} \right| \lesssim \left\| \log \frac{\rho_T^*(Y_1)}{\rho_T^\psi(Y_1)} \right\|_{\psi_1} \lesssim \Lambda d + M + d.$$

826 Then, on the event  $\mathcal{E}_0$ , we have

$$\begin{aligned} \left| \text{KL}(\rho_T^*, \rho_T^\psi) - \frac{1}{n} \sum_{i=1}^n \log \frac{\rho_T^*(Y_i)}{\rho_T^\psi(Y_i)} \right| &\lesssim \sqrt{\text{Var} \left( \log \frac{\rho_T^*(Y_1)}{\rho_T^\psi(Y_1)} \right) \frac{\log(2|\Psi_\varepsilon|/\delta)}{n}} \\ &\quad + \frac{(\Lambda d + M + d) \log n \log(2|\Psi_\varepsilon|/\delta)}{n} \end{aligned} \quad (9)$$

827 simultaneously for all  $\psi \in \Psi_\varepsilon$ .

828 **Step 3: bounding the loss variance.** One of the key ingredients in the proof of Theorem 1,  
829 which allows us to hope for faster rates of convergence than  $\mathcal{O}(n^{-1/2})$ , is analysis of the variance  
830 of  $\log(\rho_T^*(Y_1)/\rho_T^\psi(Y_1))$ ,  $\psi \in \Psi$ . On this step, we are going to show that it satisfies a Bernstein-type  
831 condition

$$\text{Var} \left( \log \frac{\rho_T^*(Y_1)}{\rho_T^\psi(Y_1)} \right) \lesssim (\Lambda d + M + d) \log n \left( \text{KL}(\rho_T^*, \rho_T^\psi) + \frac{1}{n} \right) \quad \text{for all } \psi \in \Psi.$$

832 The proof of this fact easily follows from Lemmata C.1 and C.2 presented in Appendix C. Indeed,  
833 Lemma C.1 implies that

$$\begin{aligned} \text{Var} \left( \log \frac{\rho_T^*(Y_1)}{\rho_T^\psi(Y_1)} \right) &\leq \mathbb{E} \left( \log \frac{\rho_T^*(Y_1)}{\rho_T^\psi(Y_1)} \right)^2 \\ &\leq 2 \log(1/\omega) \text{KL}(\rho_T^*, \rho_T^\psi) + 2 \mathbb{E} \left( \log \frac{\omega \rho_T^*(Y_1) + (1-\omega) \rho_T^\psi(Y_1)}{\rho_T^\psi(Y_1)} \right)^2 \end{aligned} \quad (10)$$

834 for any  $\omega \in (0, 1)$ . On the other hand, let  $A$  and  $B$  be non-negative constants such that

$$\log \frac{\rho_T^*(y)}{\rho_T^\psi(y)} \leq A\|y\|^2 + B \quad \text{for all } y \in \mathbb{R}^d.$$

835 Note that, due to (7), we can take  $A = \mathcal{O}(\Lambda)$  and  $B = \mathcal{O}(M + d)$ . Then, according to Lemma C.2,  
836 it holds that

$$\mathbb{E} \left( \log \frac{\omega \rho_T^*(Y_1) + (1 - \omega) \rho_T^\psi(Y_1)}{\rho_T^\psi(Y_1)} \right)^2 \lesssim e^B \omega + 6^d \left( \log \frac{1}{\omega} + A \right) e^{B/(16Av^2)} \omega^{1/(16Av^2)}.$$

837 Note that the assumptions the statement of Lemma C.2 imposed on  $\rho_T^*$  are milder than we require in  
838 Assumption 2. Taking

$$\omega = e^{-B} \left( \frac{1}{n} \wedge (6^d n)^{-16Av^2} \right)$$

839 we obtain that

$$\max \left\{ e^B \omega, 6^d e^{B/(16Av^2)} \omega^{1/(16Av^2)} \right\} \leq \frac{1}{n},$$

840 and then

$$\log(1/\omega) = \max \{ B + \log n, 16Av^2 d \log 6 + 16Av^2 \log n \} \lesssim (\Lambda d + M + d) \log n.$$

841 Furthermore, such choice of  $\omega$  ensures that

$$\mathbb{E} \left( \log \frac{\omega \rho_T^*(Y_1) + (1 - \omega) \rho_T^\psi(Y_1)}{\rho_T^\psi(Y_1)} \right)^2 \lesssim \frac{(Ad + B + 1) \log n}{n} \lesssim \frac{(\Lambda d + M + d) \log n}{n}.$$

842 Summing up the last two inequalities and (10), we deduce that

$$\text{Var} \left( \log \frac{\rho_T^*(Y_1)}{\rho_T^\psi(Y_1)} \right) \lesssim (\Lambda d + M + d) \log n \left( \text{KL}(\rho_T^*, \rho_T^\psi) + \frac{1}{n} \right). \quad (11)$$

843 **Step 4: from  $\varepsilon$ -net to a uniform Bernstein-type bound, part 1.** Substituting the variance in (9)  
844 by its upper bound (11), we observe that, on the event  $\mathcal{E}_0$ , simultaneously for all  $\psi \in \Psi_\varepsilon$  it holds that

$$\begin{aligned} \left| \text{KL}(\rho_T^*, \rho_T^\psi) - \frac{1}{n} \sum_{i=1}^n \log \frac{\rho_T^*(Y_i)}{\rho_T^\psi(Y_i)} \right| &\lesssim \sqrt{(\Lambda d + M + d) \log n \left( \text{KL}(\rho_T^*, \rho_T^\psi) + \frac{1}{n} \right) \frac{\log(2|\Psi_\varepsilon|/\delta)}{n}} \\ &\quad + (\Lambda d + M + d) \frac{\log n \log(2|\Psi_\varepsilon|/\delta)}{n} \\ &\lesssim \sqrt{(\Lambda d + M + d) \text{KL}(\rho_T^*, \rho_T^\psi) \frac{\log n \log(2|\Psi_\varepsilon|/\delta)}{n}} \\ &\quad + (\Lambda d + M + d) \frac{\log n \log(2|\Psi_\varepsilon|/\delta)}{n}. \end{aligned}$$

845 The goal of this step is to transform this upper bound to a one holding uniformly for all  $\psi \in \Psi$ .  
846 For this purpose, let us fix an arbitrary  $\theta \in \Theta$  and let  $\theta_\varepsilon$  be the closest to  $\theta$  element of the  $\varepsilon$ -net  $\Theta_\varepsilon$ .  
847 According to the definition of  $\Theta_\varepsilon$ , this means that

$$\|\theta - \theta_\varepsilon\|_\infty \leq \varepsilon.$$

848 Let us denote the corresponding to  $\theta$  and  $\theta_\varepsilon$  functions by  $\psi \in \Psi$  and  $\psi_\varepsilon \in \Psi$ , respectively. The goal  
849 of this and the next steps is to show that the differences

$$\text{KL}(\rho_T^*, \rho_T^\psi) - \text{KL}(\rho_T^*, \rho_T^{\psi_\varepsilon}) \quad \text{and} \quad \frac{1}{n} \sum_{i=1}^n \log \rho_T^\psi(Y_i) - \frac{1}{n} \sum_{i=1}^n \log \rho_T^{\psi_\varepsilon}(Y_i)$$

850 are sufficiently small. Let us first elaborate on the difference of KL-divergences and postpone the  
851 study of the empirical risks until the next step. Note that

$$\begin{aligned} \text{KL}(\rho_T^*, \rho_T^\psi) - \text{KL}(\rho_T^*, \rho_T^{\psi_\varepsilon}) &= \mathbb{E}_{Y \sim \rho_T^*} \log \frac{\rho_T^*(Y)}{\rho_T^\psi(Y)} - \mathbb{E}_{Y \sim \rho_T^*} \log \frac{\rho_T^*(Y)}{\rho_T^{\psi_\varepsilon}(Y)} \\ &= \mathbb{E}_{Y \sim \rho_T^*} \log \frac{\rho_T^{\psi_\varepsilon}(Y)}{\rho_T^\psi(Y)}. \end{aligned}$$

852 We would like to recall that for any log-potential  $\psi$  the corresponding marginal density  $\rho_T^\psi$  has the  
853 form

$$\rho_T^\psi(y) = \int_{\mathbb{R}^d} \frac{e^{\psi(y)} \mathbf{q}(y|x)}{\mathcal{T}_T e^{\psi(x)}} \rho(x) dx.$$

854 Due to Assumption 4, it holds that

$$|\mathbb{E}_{Y \sim \rho_T^*} \psi(Y) - \mathbb{E}_{Y \sim \rho_T^*} \psi_\varepsilon(Y)| \leq L\varepsilon (1 + \mathbb{E}_{Y \sim \rho_T^*} \|Y\|^2). \quad (12)$$

855 For sub-Gaussian random vectors, we have

$$\mathbb{E}_{Y \sim \rho_T^*} \|Y\|^2 = \text{Tr}(\mathbb{E}_{Y \sim \rho_T^*} YY^\top) \lesssim v^2 d,$$

856 and then

$$|\mathbb{E}_{Y \sim \rho_T^*} \psi(Y) - \mathbb{E}_{Y \sim \rho_T^*} \psi_\varepsilon(Y)| \lesssim L\varepsilon d.$$

857 Thus, it remains to bound

$$\begin{aligned} & \left| \mathbb{E}_{Y \sim \rho_T^*} \left( \log \frac{\rho_T^\psi(Y)}{\rho_T^{\psi_\varepsilon}(Y)} + \psi_\varepsilon(Y) - \psi(Y) \right) \right| \\ &= \left| \mathbb{E}_{Y \sim \rho_T^*} \log \left( \int_{\mathbb{R}^d} \frac{\mathbf{q}(Y|x)}{\mathcal{T}_T e^{\psi(x)}} \rho(x) dx \right) - \mathbb{E}_{Y \sim \rho_T^*} \log \left( \int_{\mathbb{R}^d} \frac{\mathbf{q}(Y|x)}{\mathcal{T}_T e^{\psi_\varepsilon(x)}} \rho(x) dx \right) \right|. \end{aligned}$$

858 This is the hardest and the most technical part of our derivations. It relies on properties of the  
859 Ornstein-Uhlenbeck operator we establish in Lemma B.2 and Lemma B.3. However, with these  
860 lemmata at hand, the desired bound on the difference of KL-divergences becomes straightforward.  
861 Indeed, according to Lemma B.2, for any  $y \in \mathbb{R}^d$  it holds that

$$\begin{aligned} & \left| \log \int_{\mathbb{R}^d} \frac{\mathbf{q}(y|x)}{\mathcal{T}_T e^{\psi(x)}} \rho_0(x) dx - \log \int_{\mathbb{R}^d} \frac{\mathbf{q}(y|x)}{\mathcal{T}_T e^{\psi_\varepsilon(x)}} \rho_0(x) dx \right| \\ & \lesssim (\mathcal{T}_\infty |\psi - \psi_\varepsilon|)^{1/\mathcal{K}(T)} \left( d^2 + \left\| \Sigma^{-1/2}(y - m) \right\|^2 \right)^{1-1/\mathcal{K}(T)} \\ & \quad \cdot \exp \left\{ \mathcal{O}(d + (M \vee \log \Lambda) \sqrt{d} e^{-bT}) \right\} \\ & \quad \cdot \exp \left\{ 3e^{-bT} \left\| \Sigma_T^{-1/2}(y - m) \right\|^2 + \mathcal{O}(e^{-bT}) \right\}, \end{aligned}$$

862 where  $\Sigma_T$  is defined in (4) and

$$1 \leq \mathcal{K}(T) = (1 - e^{-2bT})^{-5e^2 \sqrt{d}} \cdot \exp \left\{ 2e^2 \sqrt{d} \arcsin(e^{-bT}) \right\} = 1 + \mathcal{O}(\sqrt{d} e^{-bT}).$$

863 Let us introduce

$$\mathcal{H}(T) = \exp \left\{ \mathcal{O}(d + (M \vee \log \Lambda) \sqrt{d} e^{-bT}) \right\}. \quad (13)$$

864 Then, due to the Cauchy-Schwarz inequality, it holds that

$$\begin{aligned} & \left| \mathbb{E}_{Y \sim \rho_T^*} \log \left( \int_{\mathbb{R}^d} \frac{\mathbf{q}(Y|x)}{\mathcal{T}_T e^{\psi(x)}} \rho(x) dx \right) - \mathbb{E}_{Y \sim \rho_T^*} \log \left( \int_{\mathbb{R}^d} \frac{\mathbf{q}(Y|x)}{\mathcal{T}_T e^{\psi_\varepsilon(x)}} \rho(x) dx \right) \right| \\ & \lesssim \mathcal{H}(T) (\mathcal{T}_\infty |\psi - \psi_\varepsilon|)^{1/\mathcal{K}(T)} \mathbb{E}_{Y \sim \rho_T^*} \left[ \left( d^2 + \left\| \Sigma^{-1/2}(Y - m) \right\|^2 \right)^{1-1/\mathcal{K}(T)} \right. \\ & \quad \cdot \exp \left\{ 3e^{-bT} \left\| \Sigma_T^{-1/2}(Y - m) \right\|^2 + \mathcal{O}(e^{-bT}) \right\} \left. \right] \\ & \leq \mathcal{H}(T) (\mathcal{T}_\infty |\psi - \psi_\varepsilon|)^{1/\mathcal{K}(T)} \sqrt{\mathbb{E}_{Y \sim \rho_T^*} \left( d^2 + \left\| \Sigma^{-1/2}(Y - m) \right\|^2 \right)^{2-2/\mathcal{K}(T)}} \\ & \quad \cdot \sqrt{\mathbb{E}_{Y \sim \rho_T^*} \exp \left\{ 12e^{-bT} \left\| \Sigma_T^{-1/2} Y \right\|^2 + 12e^{-bT} \left\| \Sigma_T^{-1/2} m \right\|^2 + \mathcal{O}(e^{-bT}) \right\}}. \end{aligned}$$

865 Since  $24v^2 e^{-bT} \|\Sigma_T^{-1}\| < 1$ , the exponential moment in the right-hand side is finite and

$$\begin{aligned} \mathbb{E}_{Y \sim \rho_T^*} \exp \left\{ 12e^{-bT} \left\| \Sigma_T^{-1/2} Y \right\|^2 \right\} &\leq \mathbb{E}_{Y \sim \rho_T^*} \exp \left\{ 12e^{-bT} \left\| \Sigma_T^{-1} \right\| \|Y\|^2 \right\} \\ &\lesssim (1 - 24v^2 e^{-bT})^{-d/2} \\ &\lesssim de^{-bT} \leq e^{-5}. \end{aligned}$$

866 The last inequality is due to the fact that  $bT \geq 5 + \log d$ . This yields that

$$\begin{aligned} &\left| \mathbb{E}_{Y \sim \rho_T^*} \log \left( \int_{\mathbb{R}^d} \frac{q(Y|x)}{\mathcal{T}_T e^{\psi(x)}} \rho(x) dx \right) - \mathbb{E}_{Y \sim \rho_T^*} \log \left( \int_{\mathbb{R}^d} \frac{q(Y|x)}{\mathcal{T}_T e^{\psi_\varepsilon(x)}} \rho(x) dx \right) \right| \\ &\lesssim \mathcal{H}(T) (\mathcal{T}_\infty |\psi - \psi_\varepsilon|)^{1/\mathcal{K}(T)} \cdot d^{\mathcal{O}(\sqrt{d}e^{-bT})} \cdot \exp \left\{ 6e^{-bT} \left\| \Sigma_T^{-1/2} m \right\|^2 + \mathcal{O}(e^{-bT}) \right\} \\ &\lesssim \mathcal{H}(T) (\mathcal{T}_\infty |\psi - \psi_\varepsilon|)^{1/\mathcal{K}(T)}. \end{aligned}$$

867 Let us elaborate on  $\mathcal{T}_\infty |\psi - \psi_\varepsilon|$ . By the definition of  $\mathcal{T}_\infty$  and Assumption 4, it holds that

$$\begin{aligned} \mathcal{T}_\infty |\psi - \psi_\varepsilon| &= \mathbb{E}_{\eta \sim \mathcal{N}(m, \Sigma)} |\psi(\eta) - \psi_\varepsilon(\eta)| \\ &\leq L \|\theta - \theta_\varepsilon\|_\infty \mathbb{E}_{\eta \sim \mathcal{N}(m, \Sigma)} (1 + \|\eta\|^2) \\ &\leq L\varepsilon \mathbb{E}_{\eta \sim \mathcal{N}(m, \Sigma)} (1 + \|\eta\|^2). \end{aligned} \tag{14}$$

868 The expression in the right-hand side can be computed explicitly:

$$L\varepsilon \mathbb{E}_{\eta \sim \mathcal{N}(m, \Sigma)} (1 + \|\eta\|^2) = L\varepsilon (1 + \|m\|^2 + \text{Tr}(\Sigma)) \leq L\varepsilon (1 + \|m\|^2 + \|\Sigma\|d) \lesssim L\varepsilon d.$$

869 Hence, we showed that on the event  $\mathcal{E}_1$

$$\begin{aligned} &\left| \mathbb{E}_{Y \sim \rho_T^*} \log \left( \int_{\mathbb{R}^d} \frac{q(Y|x)}{\mathcal{T}_T e^{\psi(x)}} \rho(x) dx \right) - \mathbb{E}_{Y \sim \rho_T^*} \log \left( \int_{\mathbb{R}^d} \frac{q(Y|x)}{\mathcal{T}_T e^{\psi_\varepsilon(x)}} \rho(x) dx \right) \right| \\ &\lesssim \mathcal{H}(T) (L\varepsilon d)^{1/\mathcal{K}(T)}. \end{aligned}$$

870 This, together with (12), implies that

$$\left| \text{KL}(\rho_T^*, \rho_T^\psi) - \text{KL}(\rho_T^*, \rho_T^{\psi_\varepsilon}) \right| \lesssim L\varepsilon d + de^{-bT} \mathcal{H}(T) (L\varepsilon d)^{1/\mathcal{K}(T)} \lesssim L\varepsilon d + \mathcal{H}(T) (L\varepsilon d)^{1/\mathcal{K}(T)}.$$

871 **Step 5: from  $\varepsilon$ -net to a uniform Bernstein-type bound, part 2.** The proof of an upper bound on  
872 the absolute value of

$$\frac{1}{n} \sum_{i=1}^n \log \rho_T^\psi(Y_i) - \frac{1}{n} \sum_{i=1}^n \log \rho_T^{\psi_\varepsilon}(Y_i)$$

873 proceeds in a similar way. Due to Assumption 4, it holds that

$$\left| \frac{1}{n} \sum_{i=1}^n (\psi(Y_i) - \psi_\varepsilon(Y_i)) \right| \leq \frac{L\varepsilon}{n} \sum_{i=1}^n (1 + \|Y_i\|^2).$$

874 It is known (see the proof of Theorem 1.19 in [Rigollet and Hütter, 2023]) that the norm of a  
875 sub-Gaussian random vector satisfies the inequality

$$\mathbb{P}(\|Y_1\| \geq u) \leq 6^d \exp \left\{ -\frac{u^2}{8v^2} \right\} \quad \text{for all } u > 0.$$

876 This and the union bound imply that there exists an event  $\mathcal{E}_1$  of probability at least  $1 - \delta$  such that

$$\max_{1 \leq i \leq n} \|Y_i\|^2 \leq d \log 6 + 8v^2 \log(n/\delta) \quad \text{on } \mathcal{E}_1. \tag{15}$$



877 On this event, we have<sup>1</sup>

$$\begin{aligned} \left| \frac{1}{n} \sum_{i=1}^n (\psi(Y_i) - \psi_\varepsilon(Y_i)) \right| &\leq L\varepsilon (1 + d \log 6 + 8\mathfrak{v}^2 \log^2(n/\delta)) \\ &\lesssim L\varepsilon (d + \log(n/\delta)). \end{aligned} \quad (16)$$

878 As in the previous step, the study of

$$\begin{aligned} &\left| \frac{1}{n} \sum_{i=1}^n \log \frac{\rho_T^\psi(Y_i)}{\rho_T^{\psi_\varepsilon}(Y_i)} + \psi_\varepsilon(Y_i) - \psi(Y_i) \right| \\ &= \left| \frac{1}{n} \sum_{i=1}^n \left[ \log \left( \int_{\mathbb{R}^d} \frac{\mathbf{q}(Y_i | x)}{\mathcal{T}_T e^{\psi(x)}} \rho(x) dx \right) - \log \left( \int_{\mathbb{R}^d} \frac{\mathbf{q}(Y_i | x)}{\mathcal{T}_T e^{\psi_\varepsilon(x)}} \rho(x) dx \right) \right] \right| \end{aligned}$$

879 relies on Lemma B.3. Applying this lemma and using (14), we observe that, on the event  $\mathcal{E}_1$ ,

$$\begin{aligned} &\left| \frac{1}{n} \sum_{i=1}^n \left[ \log \left( \int_{\mathbb{R}^d} \frac{\mathbf{q}(Y_i | x)}{\mathcal{T}_T e^{\psi(x)}} \rho(x) dx \right) - \log \left( \int_{\mathbb{R}^d} \frac{\mathbf{q}(Y_i | x)}{\mathcal{T}_T e^{\psi_\varepsilon(x)}} \rho(x) dx \right) \right] \right| \\ &\lesssim \mathcal{H}(T) (\mathcal{T}_\infty |\psi - \psi_\varepsilon|)^{1/\mathcal{K}(T)} \\ &\quad \cdot \mathbb{E}_{Y \sim \rho_T^*} \left[ \left( d^2 + \|\Sigma^{-1}\| (d \log 6 + 8\mathfrak{v}^2 \log(n/\delta)) + \|\Sigma^{-1/2} m\|^2 \right)^{1-1/\mathcal{K}(t)} \right] \\ &\quad \cdot \exp \left\{ 6e^{-bT} \|\Sigma_T^{-1}\| (d \log 6 + 8\mathfrak{v}^2 \log(n/\delta)) + 6e^{-bT} \|\Sigma_T^{-1/2} m\|^2 + \mathcal{O}(e^{-bT}) \right\} \\ &\lesssim \mathcal{H}(T) (L\varepsilon d)^{1/\mathcal{K}(T)} \exp \{ 12e^{-bT} \|\Sigma_T^{-1}\| (d \log 6 + 8\mathfrak{v}^2 \log(n/\delta)) \}. \end{aligned}$$

880 This, together with (16), implies that

$$\begin{aligned} &\left| \frac{1}{n} \sum_{i=1}^n \log \rho_T^\psi(Y_i) - \frac{1}{n} \sum_{i=1}^n \log \rho_T^{\psi_\varepsilon}(Y_i) \right| \\ &\lesssim L\varepsilon (d + \log(n/\delta)) + \mathcal{H}(T) (L\varepsilon d)^{1/\mathcal{K}(T)} \exp \{ 12e^{-bT} \|\Sigma_T^{-1}\| (d \log 6 + 8\mathfrak{v}^2 \log(n/\delta)) \}. \end{aligned}$$

881 **Step 6: choice of  $\varepsilon$ .** Let us take

$$\varepsilon = \frac{1}{Lnd} \wedge \frac{(\mathcal{H}(T))^{-\mathcal{K}(T)}}{Ldn^{\mathcal{K}(T)}} \exp \{ -12e^{-bT} \|\Sigma_T^{-1}\| (d \log 6 + 8\mathfrak{v}^2 \log(n/\delta)) \}.$$

882 Such a choice of  $\varepsilon$  ensures that

$$\max \left\{ L\varepsilon d, \mathcal{H}(T) (L\varepsilon d)^{1/\mathcal{K}(T)} \exp \{ 12\mathcal{K}(T) e^{-bT} \|\Sigma_T^{-1}\| (d \log 6 + 8\mathfrak{v}^2 \log(n/\delta)) \} \right\} \leq \frac{1}{n}$$

883 and

$$\begin{aligned} \log(1/\varepsilon) &\leq \log(Ld) + \mathcal{K}(T) (\log \mathcal{H}(T) + \log n + 3de^{-bT} \log 6 + 24\mathfrak{v}^2 e^{-bT} \log(n/\delta)) \\ &\lesssim d + \log(Ln) + e^{-bT} \log(n/\delta) + (M \vee \log \Lambda) \sqrt{d} e^{-bT} \\ &\lesssim d + \log(Ln) + e^{-bT} \log(1/\delta) + (M \vee \log \Lambda) \sqrt{d} e^{-bT}. \end{aligned} \quad (17)$$

884 Here we used the fact that, due to (13)

$$\log \mathcal{H}(T) = \mathcal{O}(d + (M \vee \log \Lambda) \sqrt{d} e^{-bT}).$$

<sup>1</sup>One can obtain a bit sharper bound  $\mathcal{O}(L\varepsilon(d + \log(1/\delta)))$  using concentration inequalities for sums of independent sub-Gaussian random variables. However, the bound  $\mathcal{O}(L\varepsilon(d + \log(n/\delta)))$  obtained in a simpler way is enough for our purposes.

Hence, on the intersection of the events  $\mathcal{E}_0$  and  $\mathcal{E}_1$  (that, is with probability at least  $(1 - 2\delta)$ ), for all  $\psi \in \Psi$  it holds that

$$\begin{aligned} \text{KL}(\rho_T^*, \rho_T^\psi) - \frac{1}{n} \sum_{i=1}^n \log \frac{\rho_T^*(Y_i)}{\rho_T^\psi(Y_i)} &\lesssim \frac{de^{-bT} + \log n}{n} \\ &\quad + \sqrt{(\Lambda d + M + d) \text{KL}(\rho_T^*, \rho_T^\psi) \frac{\log n \log(2|\Psi_\varepsilon|/\delta)}{n}} \\ &\quad + (\Lambda d + M + d) \frac{\log n \log(2|\Psi_\varepsilon|/\delta)}{n}. \end{aligned}$$

Since  $\log(1/\varepsilon)$  satisfies (17), we have

$$\log(|\Psi_\varepsilon|/\delta) \leq D \log \frac{2R}{\varepsilon\delta} \lesssim Dd + D \log \frac{RLn}{\delta} + D(M \vee \log \Lambda) \sqrt{de^{-bT}}.$$

This bound implies that

$$\begin{aligned} &(\Lambda d + M + d) \frac{\log n \log(2|\Psi_\varepsilon|/\delta)}{n} \\ &\lesssim (\Lambda d + M + d) \left( d + \log \frac{RLn}{\delta} + (M \vee \log \Lambda) \sqrt{de^{-bT}} \right) \frac{D \log n}{n} \\ &= \Upsilon(n, \delta) \end{aligned}$$

and

$$\text{KL}(\rho_T^*, \rho_T^\psi) - \frac{1}{n} \sum_{i=1}^n \log \frac{\rho_T^*(Y_i)}{\rho_T^\psi(Y_i)} \lesssim \sqrt{\Upsilon(n, \delta) \text{KL}(\rho_T^*, \rho_T^\psi)} + \Upsilon(n, \delta)$$

simultaneously for all  $\psi \in \Psi$  with probability at least  $(1 - 2\delta)$ .

**Step 7: final bound.** Let  $\psi^\circ$  minimize<sup>2</sup>  $\text{KL}(\rho_T^*, \rho_T^\psi)$  over  $\psi \in \Psi$  and denote the corresponding density by  $\rho_T^\circ$ . Since  $\hat{\psi}$  minimizes the empirical risk, it holds that

$$\begin{aligned} &\text{KL}(\rho_T^*, \hat{\rho}_T) - \text{KL}(\rho_T^*, \rho_T^\circ) \\ &\leq \text{KL}(\rho_T^*, \hat{\rho}_T) - \frac{1}{n} \sum_{i=1}^n \log \frac{\rho_T^*(Y_i)}{\hat{\rho}_T(Y_i)} - \text{KL}(\rho_T^*, \rho_T^\circ) + \frac{1}{n} \sum_{i=1}^n \log \frac{\rho_T^*(Y_i)}{\rho_T^\circ(Y_i)} \\ &\lesssim \sqrt{\Upsilon(n, \delta) \text{KL}(\rho_T^*, \rho_T^\circ)} + \sqrt{\Upsilon(n, \delta) \text{KL}(\rho_T^*, \hat{\rho}_T)} + \Upsilon(n, \delta) \\ &\leq \sqrt{\Upsilon(n, \delta) (\text{KL}(\rho_T^*, \hat{\rho}_T) - \text{KL}(\rho_T^*, \rho_T^\circ))} + 2\sqrt{\Upsilon(n, \delta) \text{KL}(\rho_T^*, \rho_T^\circ)} + \Upsilon(n, \delta). \end{aligned}$$

Solving the quadratic inequality with respect to  $(\text{KL}(\rho_T^*, \hat{\rho}_T) - \text{KL}(\rho_T^*, \rho_T^\circ))^{1/2}$ , we obtain that

$$\text{KL}(\rho_T^*, \hat{\rho}_T) - \text{KL}(\rho_T^*, \rho_T^\circ) \lesssim \sqrt{\Upsilon(n, \delta) \text{KL}(\rho_T^*, \rho_T^\circ)} + \Upsilon(n, \delta).$$

□

## B Properties of the Ornstein-Uhlenbeck operator

This section contains auxiliary results on properties of the Ornstein-Uhlenbeck operator used in the proof of Theorem 1. The first one helps us to establish that under Assumption 3  $-\log \rho_T^\psi(y)$  grows as fast as  $\mathcal{O}(\|y\|^2)$ .

**Lemma B.1.** Let  $M \in \mathbb{R}$  and let  $\psi : \mathbb{R}^d \rightarrow \mathbb{R}$  be such that

$$\mathcal{T}_\infty \psi = 0 \quad \text{and} \quad \psi(x) \leq M \quad \text{for all } x \in \mathbb{R}^d.$$

<sup>2</sup>If the minimum is not attained, one should consider a minimizing sequence.

900 Then the density

$$\rho_T^\psi(y) = \int_{\mathbb{R}^d} \frac{e^{\psi(y)} \mathbf{q}(y|x)}{\mathcal{T}_T e^{\psi(x)}} \rho_0(x) dx,$$

901 corresponding to the log-potential  $\psi$ , satisfies

$$\begin{aligned} \psi(y) - \log \rho_T^\psi(y) &\leq M + \frac{d}{2} \log(2\pi) + \frac{d}{2} \log \left( \frac{\|\Sigma\|}{2b} + e^{-2bT} \right) \\ &\quad + \frac{2b}{1 - e^{-2bT}} \left\| \Sigma^{-1/2}(y - m) \right\|^2 + \frac{2be^{-2bT}}{1 - e^{-2bT}} \left\| \Sigma^{-1/2}m \right\|^2. \end{aligned}$$

902 The proof of Lemma B.1 is deferred to Appendix B.1. Under Assumptions 2 and 3, it helps us to  
 903 conclude that  $\log(\rho_T^*(Y_1)/\rho_T^\psi(Y_1))$  is a sub-exponential random variable. The next auxiliary lemma  
 904 shows that  $\log \rho_T^\psi(y)$  changes smoothly with respect to  $\psi$ . This is a key technical result which allows  
 905 us to derive a uniform Bernstein-type inequality relating  $\text{KL}(\rho_T^*, \rho_T^\psi)$  and its empirical counterpart.

906 **Lemma B.2.** *Let us consider arbitrary functions  $f_0 : \mathbb{R}^d \rightarrow \mathbb{R}$  and  $f_1 : \mathbb{R}^d \rightarrow \mathbb{R}$  such that*  
 907  *$\mathcal{T}_\infty f_0 = \mathcal{T}_\infty f_1 = 0$ . Assume that there are some constants  $M \in \mathbb{R}$ ,  $A \geq 0$ , and  $B \geq \max\{M, 0\}$*   
 908 *such that*

$$-A \left\| \Sigma^{-1/2}(x - m) \right\|^2 - B \leq f_i(x) \leq M \quad \text{for all } x \in \mathbb{R}^d \text{ and } i \in \{0, 1\}.$$

909 Let

$$\mathbf{q}(y|x) = \frac{1}{(2\pi)^{d/2} \sqrt{\det(\Sigma_T)}} \exp \left\{ -\frac{1}{2} \left\| \Sigma_T^{-1/2}(y - m_T(x)) \right\|^2 \right\}.$$

910 Suppose that  $bT \geq (5 + \log d) \vee \log(160b\|\Sigma^{-1}\|)$ . Then for any  $y \in \mathbb{R}^d$  it holds that

$$\begin{aligned} &\left| \log \int_{\mathbb{R}^d} \frac{\mathbf{q}(y|x)}{\mathcal{T}_T e^{f_1(x)}} \rho_0(x) dx - \log \int_{\mathbb{R}^d} \frac{\mathbf{q}(y|x)}{\mathcal{T}_T e^{f_0(x)}} \rho_0(x) dx \right| \\ &\lesssim (\mathcal{T}_\infty |f_1 - f_0|)^{1/\mathcal{K}(T)} \left( d^2 + \left\| \Sigma^{-1/2}(y - m) \right\|^2 \right)^{1-1/\mathcal{K}(T)} \\ &\quad \cdot \exp \left\{ \mathcal{O}(d + (M + \log(A \vee B))\sqrt{d}e^{-bT}) \right\} \\ &\quad \cdot \exp \left\{ 3e^{-bT} \left\| \Sigma_T^{-1/2}(y - m) \right\|^2 + \mathcal{O}(e^{-bT}) \right\}, \end{aligned}$$

911 where the function  $\mathcal{K}(t)$  is defined in (21). The hidden constants behind  $\lesssim$  and  $\mathcal{O}$  depend on  $\Sigma$ ,  $m$ ,  
 912 and  $b$  only.

913 Let us note that Lemma B.2 provides a more subtle result than Lemma B.1. We provide the proof of  
 914 Lemma B.2 in Appendix B.2. Unlike Lemma B.1, the proof of Lemma B.2 is quite long and technical  
 915 and relies on non-trivial properties of the Ornstein-Uhlenbeck operator  $\mathcal{T}_t$ . In particular, it relies on  
 916 the following result about asymptotic behaviour of  $\mathcal{T}_t$ .

917 **Lemma B.3.** *Let  $f : \mathbb{R}^d \rightarrow \mathbb{R}$  and  $g : \mathbb{R}^d \rightarrow \mathbb{R}$ . Assume that there exists  $M \in \mathbb{R}$  and some*  
 918 *non-negative constants  $A$ ,  $B$ , and  $\alpha$  such that*

$$f(x) \leq M, \quad 0 \leq g(x) \leq A \left\| \Sigma^{-1/2}(x - m) \right\|^\alpha + B \quad \text{for all } x \in \mathbb{R}^d. \quad (18)$$

919 Let us fix arbitrary  $x \in \mathbb{R}^d$  and  $t > 0$  and introduce

$$G(x) = Be^M + 2^{\alpha-1} Ae^M \left\| \Sigma^{-1/2}(x - m) \right\|^\alpha + 4^{\alpha-1} Ae^M (2b)^{-\alpha/2} \left( (10\alpha\sqrt{d})^\alpha + d^\alpha \right), \quad (19)$$

920

$$\mathcal{A}(x, t) = \left( \frac{be^2}{\sqrt{d}} \left\| \Sigma^{-1/2}(x - m) \right\|^2 + 4e^2\sqrt{d} \right) \arcsin(e^{-bt}) - 10e^2\sqrt{d} \log(1 - e^{-2bt}), \quad (20)$$

921 and

$$\mathcal{K}(t) = (1 - e^{-2bt})^{-5e^2\sqrt{d}} \cdot \exp \left\{ 2e^2\sqrt{d} \arcsin(e^{-bt}) \right\} \quad (21)$$

922 Then, it holds that

$$e^{-\mathcal{A}(x,t)\mathcal{K}(t)} \left( \frac{\mathcal{T}_\infty g(x) e^{f(x)}}{G(x)} \right)^{\mathcal{K}(t)} \leq \frac{\mathcal{T}_t g(x) e^{f(x)}}{G(x)} \leq e^{\mathcal{A}(x,t)/\mathcal{K}(t)} \left( \frac{\mathcal{T}_\infty g(x) e^{f(x)}}{G(x)} \right)^{1/\mathcal{K}(t)}.$$

923 The proof of Lemma B.3 is postponed to Appendix B.3. The key ingredients of the proof are the  
 924 Kolmogorov-Fokker-Planck equation, a Gronwall-type bound from Lemma D.1 and a sharp bound  
 925 on the  $L_p$ -norm of a centered chi-squared random variable (see Lemma D.3).

## 926 B.1 Proof of Lemma B.1

927 Let us note that

$$\mathcal{T}_\infty e^{\psi(x)} \leq \mathcal{T}_\infty e^M \leq e^M.$$

928 This yields that

$$\psi(y) - \log \rho_T^\psi(y) = -\log \int_{\mathbb{R}^d} \frac{\mathbf{q}(y|x)}{\mathcal{T}_t e^{\psi(x)}} \rho_0(x) dx \leq M - \log \int_{\mathbb{R}^d} \mathbf{q}(y|x) \rho_0(x) dx.$$

929 The integral in the right-hand side is nothing but the marginal density of the base process  $X_t^0$  at the  
 930 moment  $t = T$ :

$$\begin{aligned} \int_{\mathbb{R}^d} \mathbf{q}(y|x) \rho_0(x) dx &= \rho_T^0(y) \\ &= (2\pi)^{-d/2} \det(\Sigma_T + e^{-2bT} I_d)^{-1/2} \exp \left\{ -\frac{1}{2} \left\| \Sigma_T^{-1/2} (y - m_T(0)) \right\|^2 \right\}. \end{aligned}$$

931 Hence,  $\rho_T^\psi(y)$  satisfies the inequality

$$\begin{aligned} \psi(y) - \log \rho_T^\psi(y) &\leq M + \frac{d}{2} \log(2\pi) + \frac{1}{2} \log \det(\Sigma_T + e^{-2bT} I_d) \\ &\quad + \frac{1}{2} \left\| \Sigma_T^{-1/2} (y - m_T(0)) \right\|^2. \end{aligned}$$

932 According to the definition of  $\Sigma_T$ , we have

$$\Sigma_T = \frac{1 - e^{-2bT}}{2b} \Sigma \preceq \frac{1 - e^{-2bT}}{2b} \|\Sigma\| I_d,$$

933 and then

$$\det(\Sigma_T + e^{-2bT} I_d) \leq \det \left( \frac{\|\Sigma\|}{2b} I_d + e^{-2bT} I_d \right) = \left( \frac{\|\Sigma\|}{2b} + e^{-2bT} \right)^d.$$

934 Taking into account that

$$m_T(0) = (1 - e^{-bT})m$$

935 and using the Cauchy-Schwarz inequality

$$\frac{1}{2} \left\| \Sigma_T^{-1/2} (y - m_T(0)) \right\|^2 \leq \left\| \Sigma_T^{-1/2} (y - m) \right\|^2 + e^{-2bT} \left\| \Sigma_T^{-1/2} m \right\|^2,$$

936 we deduce the desired upper bound:

$$\begin{aligned} \psi(y) - \log \rho_T^\psi(y) &\leq M + \frac{d}{2} \log(2\pi) + \frac{d}{2} \log \left( \frac{\|\Sigma\|}{2b} + e^{-2bT} \right) \\ &\quad + \frac{2b}{1 - e^{-2bT}} \left\| \Sigma^{-1/2} (y - m) \right\|^2 + \frac{2be^{-2bT}}{1 - e^{-2bT}} \left\| \Sigma^{-1/2} m \right\|^2. \end{aligned}$$

937

□

## 938 B.2 Proof of Lemma B.2

939 Let us fix an arbitrary  $y \in \mathbb{R}^d$  and consider

$$F(s) = \log \int_{\mathbb{R}^d} \frac{\mathbf{q}(y|x)}{\mathcal{T}_t e^{f_s(x)}} \rho_0(x) dx, \quad s \in [0, 1],$$

940 where, for any  $s \in [0, 1]$ , we introduced  $f_s(x) = sf_1(x) + (1-s)f_0(x)$  for brevity. Then it is  
941 straightforward to observe that

$$\log \int_{\mathbb{R}^d} \frac{\mathbf{q}(y|x)}{\mathcal{T}_T e^{f_1(x)}} \rho_0(x) dx - \log \int_{\mathbb{R}^d} \frac{\mathbf{q}(y|x)}{\mathcal{T}_T e^{f_0(x)}} \rho_0(x) dx = F(1) - F(0).$$

942 Note that, due to the Lagrange mean value theorem, it is enough to show that

$$\begin{aligned} \left| \frac{dF(s)}{ds} \right| &\lesssim (\mathcal{T}_\infty |f_1 - f_0|)^{1/\kappa(T)} \left( d^2 + \left\| \Sigma^{-1/2}(y - m) \right\|^2 \right)^{1-1/\kappa(T)} \\ &\quad \cdot \exp \left\{ \mathcal{O}(d + (M + \log(A \vee B)) \sqrt{d} e^{-bT}) \right\} \\ &\quad \cdot \exp \left\{ 3e^{-bT} \left\| \Sigma_T^{-1/2}(y - m) \right\|^2 + \mathcal{O}(e^{-bT}) \right\}. \end{aligned} \quad (22)$$

943 In the rest of the proof, we elaborate on the derivative  $dF(s)/ds$  and derive the upper bound (22).  
944 Since the proof is quite long, we split it into several steps for reader's convenience.

945 **Step 1: properties of the Ornstein-Uhlenbeck operator.** Let us fix an arbitrary  $s \in [0, 1]$ . Note  
946 that

$$\frac{dF(s)}{ds} = \left( \int_{\mathbb{R}^d} \frac{\mathbf{q}(y|x) \mathcal{T}_T [(f_1(x) - f_0(x)) e^{f_s(x)}]}{(\mathcal{T}_T e^{f_s(x)})^2} \rho_0(x) dx \right) / \left( \int_{\mathbb{R}^d} \frac{\mathbf{q}(y|x)}{\mathcal{T}_T e^{f_s(x)}} \rho_0(x) dx \right).$$

947 Then the absolute value of  $dF(s)/ds$  does not exceed

$$\left| \frac{dF(s)}{ds} \right| \leq \left( \int_{\mathbb{R}^d} \frac{\mathbf{q}(y|x) \mathcal{T}_T [|f_1(x) - f_0(x)| e^{f_s(x)}]}{(\mathcal{T}_T e^{f_s(x)})^2} \rho_0(x) dx \right) / \left( \int_{\mathbb{R}^d} \frac{\mathbf{q}(y|x)}{\mathcal{T}_T e^{f_s(x)}} \rho_0(x) dx \right).$$

948 On this step, we focus our attention on  $\mathcal{T}_T [|f_1(x) - f_0(x)| e^{f_s(x)}]$  and  $\mathcal{T}_T e^{f_s(x)}$ . Due to the condi-  
949 tions of the lemma, it holds that

$$f_s(x) = sf_1(x) + (1-s)f_0(x) \leq sM + (1-s)M = M$$

950 and, for any  $x \in \mathbb{R}^d$ ,

$$|f_s(x)| \leq s|f_1(x)| + (1-s)|f_0(x)| \leq \max \{A\|x\|^2 + B, M\} = A\|x\|^2 + B.$$

951 Here we took into account that  $B \geq (M \vee 0)$ . Then, according to Lemma B.3, it holds that

$$e^{-\mathcal{A}(x,T)\kappa(T)} \left( \frac{\mathcal{T}_\infty e^{f_s}}{e^M} \right)^{\kappa(T)} \leq \frac{\mathcal{T}_T e^{f_s(x)}}{e^M} \leq e^{\mathcal{A}(x,T)/\kappa(T)} \left( \frac{\mathcal{T}_\infty e^{f_s}}{e^M} \right)^{1/\kappa(T)} \quad (23)$$

952 and

$$\frac{\mathcal{T}_T [|f_1(x) - f_0(x)| e^{f_s(x)}]}{\mathcal{G}(x)} \leq e^{\mathcal{A}(x,T)/\kappa(T)} \left( \frac{\mathcal{T}_\infty [|f_1 - f_0| e^{f_s}]}{\mathcal{G}(x)} \right)^{1/\kappa(T)}, \quad (24)$$

953 where the functions  $\mathcal{A}(x, t)$  and  $\mathcal{K}(t)$  are defined in (20) and (21), respectively, and

$$\mathcal{G}(x) = Be^M + \frac{Ae^M}{2} \left\| \Sigma^{-1/2}(x - m) \right\|^2 + \frac{Ae^M}{8b} (400d + d^2).$$

954 The inequality (23) yields that

$$\int_{\mathbb{R}^d} \frac{\mathbf{q}(y|x)}{\mathcal{T}_T e^{f_s(x)}} \rho_0(x) dx \geq \frac{e^{M/\mathcal{K}(t)-M}}{(\mathcal{T}_\infty e^{f_s})^{1/\mathcal{K}(T)}} \int_{\mathbb{R}^d} e^{-\mathcal{A}(x,T)/\mathcal{K}(T)} \mathbf{q}(y|x) \rho_0(x) dx$$

955 while (23) and (24) imply that

$$\begin{aligned} & \left( \int_{\mathbb{R}^d} \frac{\mathbf{q}(y|x) \mathcal{T}_T [|f_1(x) - f_0(x)| e^{f_s(x)}]}{(\mathcal{T}_T e^{f_s(x)})^2} \rho_0(x) dx \right) \\ & \leq \frac{e^{2M\mathcal{K}(T)-2M} (\mathcal{T}_\infty |f_1 - f_0| e^{f_s})^{1/\mathcal{K}(T)}}{(\mathcal{T}_\infty e^{f_s})^{2\mathcal{K}(T)}} \int_{\mathbb{R}^d} \frac{e^{2\mathcal{A}(x,T)\mathcal{K}(T)+\mathcal{A}(x,T)/\mathcal{K}(T)} \mathbf{q}(y|x)}{(\mathcal{G}(x))^{1/\mathcal{K}(T)-1}} \rho_0(x) dx \\ & \leq \frac{e^{2M\mathcal{K}(T)+M/\mathcal{K}(T)-2M} (\mathcal{T}_\infty |f_1 - f_0|)^{1/\mathcal{K}(T)}}{(\mathcal{T}_\infty e^{f_s})^{2\mathcal{K}(T)}} \int_{\mathbb{R}^d} \frac{e^{2\mathcal{A}(x,T)\mathcal{K}(T)+\mathcal{A}(x,T)/\mathcal{K}(T)} \mathbf{q}(y|x)}{(\mathcal{G}(x))^{1/\mathcal{K}(T)-1}} \rho_0(x) dx. \end{aligned}$$

956 In the last line we used the fact that  $e^{f_s(x)} \leq e^M$ . Taking these inequalities into account, we obtain  
957 that

$$\begin{aligned} & \left| \frac{dF(s)}{ds} \right| \leq e^{2M\mathcal{K}(T)-M} (\mathcal{T}_\infty |f_1 - f_0|)^{1/\mathcal{K}(T)} / (\mathcal{T}_\infty e^{f_s})^{2\mathcal{K}(T)-1/\mathcal{K}(t)} \\ & \cdot \left( \int_{\mathbb{R}^d} \frac{e^{2\mathcal{A}(x,T)\mathcal{K}(T)+\mathcal{A}(x,T)/\mathcal{K}(T)} \mathbf{q}(y|x)}{(\mathcal{G}(x))^{1/\mathcal{K}(T)-1}} \rho_0(x) dx \right) / \left( \int_{\mathbb{R}^d} e^{-\mathcal{A}(x,T)/\mathcal{K}(T)} \mathbf{q}(y|x) \rho_0(x) dx \right). \end{aligned} \quad (25)$$

958 **Step 2: lower bound on  $\mathcal{T}_\infty e^{f_s}$ .** A lower bound on  $\mathcal{T}_\infty e^{f_s}$  easily follows from the normalization  
959 conditions  $\mathcal{T}_\infty f_0 = \mathcal{T}_\infty f_1 = 0$ . Indeed, according to Jensen's inequality, we have

$$\mathcal{T}_\infty e^{f_s} \geq e^{\mathcal{T}_\infty f_s} = 1.$$

960 Then

$$\left( \frac{e^M}{\mathcal{T}_\infty e^{f_s}} \right)^{2\mathcal{K}(T)-1/\mathcal{K}(T)} \leq e^{2M\mathcal{K}(T)-M/\mathcal{K}(T)}$$

961 and (25) simplifies to

$$\begin{aligned} & \left| \frac{dF(s)}{ds} \right| \leq e^{2M\mathcal{K}(T)-M} (\mathcal{T}_\infty |f_1 - f_0|)^{1/\mathcal{K}(T)} \\ & \cdot \left( \int_{\mathbb{R}^d} \frac{e^{2\mathcal{A}(x,T)\mathcal{K}(T)+\mathcal{A}(x,T)/\mathcal{K}(T)} \mathbf{q}(y|x)}{(\mathcal{G}(x))^{1/\mathcal{K}(T)-1}} \rho_0(x) dx \right) / \left( \int_{\mathbb{R}^d} e^{-\mathcal{A}(x,T)/\mathcal{K}(T)} \mathbf{q}(y|x) \rho_0(x) dx \right). \end{aligned} \quad (26)$$

962 We have to bound the integrals ratio in the right-hand side of (26). This is the most technically involved  
963 part of the proof, so we do it in several steps. First, we focus our attention on the denominator.

964 **Step 3: elaborating on the integrals ratio, part I (denominator).** The goal of this step is to  
965 compute

$$\int_{\mathbb{R}^d} e^{-\mathcal{A}(x,T)/\mathcal{K}(T)} \mathbf{q}(y|x) \rho_0(x) dx.$$

966 The idea is to note that  $\mathcal{A}(x,T)/\mathcal{K}(T) - \log(\mathbf{q}(y|x)\rho_0(x))$  is a quadratic function with respect to  
967  $x$ . Then the integral of interest can be reduced to an integral of a Gaussian density.

968 According to the definitions of  $\mathcal{A}(x,t)$  and  $\mathcal{K}(t)$  (see (20) and (21)), it holds that

$$\frac{\mathcal{A}(x,T)}{\mathcal{K}(T)} = \frac{be^2 \arcsin(e^{-bT})}{\mathcal{K}(T)\sqrt{d}} \left\| \Sigma^{-1/2}(x-m) \right\|^2 + \frac{2 \log \mathcal{K}(T)}{\mathcal{K}(T)}.$$

969 Let

$$\beta_T = \frac{e^2 \arcsin(e^{-bT})(1 - e^{-2bT})}{\mathcal{K}(T)\sqrt{d}}. \quad (27)$$

970 With the introduced notation, we have

$$\frac{\mathcal{A}(x, T)}{\mathcal{K}(T)} = \frac{\beta_T}{2} \left\| \Sigma_T^{-1/2}(x - m) \right\|^2 + \frac{2 \log \mathcal{K}(T)}{\mathcal{K}(T)},$$

971 and then

$$\begin{aligned} & \int_{\mathbb{R}^d} e^{-\mathcal{A}(x, T)/\mathcal{K}(T)} \mathbf{q}(y | x) \rho_0(x) dx \\ &= e^{-2 \log \mathcal{K}(T)/\mathcal{K}(T)} \int_{\mathbb{R}^d} \exp \left\{ -\frac{\beta_T}{2} \left\| \Sigma_T^{-1/2}(x - m) \right\|^2 \right\} \mathbf{q}(y | x) \rho_0(x) dx. \end{aligned}$$

972 Let us elaborate on

$$\exp \left\{ -\frac{\beta_T}{2} \left\| \Sigma_T^{-1/2}(x - m) \right\|^2 \right\} \rho_0(x) = (2\pi)^{-d/2} \cdot \exp \left\{ -\frac{\beta_T}{2} \left\| \Sigma_T^{-1/2}(x - m) \right\|^2 - \frac{\|x\|^2}{2} \right\}.$$

973 It holds that

$$\begin{aligned} \beta_T \left\| \Sigma_T^{-1/2}(x - m) \right\|^2 + \|x\|^2 &= x^\top (I_d + \beta_T \Sigma_T^{-1}) x - 2\beta_T x^\top \Sigma_T^{-1} m + \beta_T \left\| \Sigma_T^{-1/2} m \right\|^2 \\ &= \left\| (I_d + \beta_T \Sigma_T^{-1})^{1/2} (x - \beta_T (I_d + \beta_T \Sigma_T^{-1})^{-1} \Sigma_T^{-1} m) \right\|^2 \\ &\quad + \beta_T \left\| \Sigma_T^{-1/2} m \right\|^2 - \beta_T^2 \left\| (I_d + \beta_T \Sigma_T^{-1})^{-1/2} \Sigma_T^{-1} m \right\|^2 \\ &= \left\| (I_d + \beta_T \Sigma_T^{-1})^{1/2} (x - \beta_T (\Sigma_T + \beta_T I_d)^{-1} m) \right\|^2 \\ &\quad + \beta_T \left\| \Sigma_T^{-1/2} m \right\|^2 - \beta_T^2 \left\| (\Sigma_T + \beta_T I_d)^{-1/2} \Sigma_T^{-1} m \right\|^2. \end{aligned}$$

974 Since

$$\Sigma_T^{-1} - \beta_T \Sigma_T^{-1} (I_d + \beta_T \Sigma_T^{-1})^{-1} \Sigma_T^{-1} = \Sigma_T^{-1} (I_d + \beta_T \Sigma_T^{-1})^{-1} = (\Sigma_T + \beta_T I_d)^{-1},$$

975 we obtain that

$$\beta_T \left\| \Sigma_T^{-1/2} m \right\|^2 - \beta_T^2 \left\| (I_d + \beta_T \Sigma_T^{-1})^{-1/2} \Sigma_T^{-1} m \right\|^2 = \beta_T \left\| (\Sigma_T + \beta_T I_d)^{-1/2} m \right\|^2$$

976 and, consequently,

$$\begin{aligned} \beta_T \left\| \Sigma_T^{-1/2}(x - m) \right\|^2 - \|x\|^2 &= \left\| (I_d + \beta_T \Sigma_T^{-1})^{-1/2} (x - \beta_T (\Sigma_T + \beta_T I_d)^{-1} m) \right\|^2 \\ &\quad + \beta_T \left\| (\Sigma_T + \beta_T I_d)^{-1/2} m \right\|^2. \end{aligned}$$

977 This means that

$$\begin{aligned} & \det (I_d + \beta_T \Sigma_T^{-1})^{-1/2} \exp \left\{ -\frac{\beta_T}{2} \left\| \Sigma_T^{-1/2}(x - m) \right\|^2 - \frac{\beta_T}{2} \left\| (\Sigma_T + \beta_T I_d)^{-1/2} m \right\|^2 \right\} \rho_0(x) \\ &= (2\pi)^{-d/2} \det (I_d + \beta_T \Sigma_T^{-1})^{-1/2} \\ &\quad \cdot \exp \left\{ -\frac{1}{2} \left\| (I_d + \beta_T \Sigma_T^{-1})^{1/2} (x - \beta_T (\Sigma_T + \beta_T I_d)^{-1} m) \right\|^2 \right\} \end{aligned}$$

978 is the density of  $\mathcal{N}(\beta_T (\Sigma_T + \beta_T I_d)^{-1} m, (I_d + \beta_T \Sigma_T^{-1})^{-1})$ . Then, due to Lemma D.2, it holds that

$$\begin{aligned} & \int_{\mathbb{R}^d} \exp \left\{ -\frac{\beta_T}{2} \left\| \Sigma_T^{-1/2}(x - m) \right\|^2 \right\} \mathbf{q}(y | x) \rho_0(x) dx \\ &= \frac{\det (I_d + \beta_T \Sigma_T^{-1})^{1/2}}{(2\pi)^{d/2} \det (\Sigma_T + e^{-2bT} (I_d + \beta_T \Sigma_T^{-1})^{-1})^{1/2}} \exp \left\{ \frac{\beta_T}{2} \left\| (\Sigma_T + \beta_T I_d)^{-1/2} m \right\|^2 \right\} \\ &\quad \cdot \exp \left\{ -\frac{1}{2} \left\| (\Sigma_T + e^{-2bT} (I_d + \beta_T \Sigma_T^{-1})^{-1})^{-1/2} (y - \mu_T(\beta_T)) \right\|^2 \right\}, \end{aligned}$$

979 where we introduced

$$\mu_T(\beta_T) = m_T(\beta_T(\Sigma_T + \beta_T I_d)^{-1} m), \quad (28)$$

980 and  $m_T(\cdot)$  is defined in (4). Thus, we obtained that

$$\begin{aligned} & \int_{\mathbb{R}^d} e^{-\mathcal{A}(x,T)/\mathcal{K}(T)} \mathbf{q}(y|x) \rho_0(x) dx \\ &= \frac{e^{-2 \log \mathcal{K}(T)/\mathcal{K}(T)} \det(I_d + \beta_T \Sigma_T^{-1})^{1/2}}{(2\pi)^{d/2} \det(\Sigma_T + e^{-2bT}(I_d + \beta_T \Sigma_T^{-1})^{-1})^{1/2}} \exp \left\{ \frac{\beta_T}{2} \left\| (\Sigma_T + \beta_T I_d)^{-1/2} m \right\|^2 \right\} \\ & \quad \cdot \exp \left\{ -\frac{1}{2} \left\| (\Sigma_T + e^{-2bT}(I_d + \beta_T \Sigma_T^{-1})^{-1})^{-1/2} (y - \mu_T(\beta_T)) \right\|^2 \right\} \\ & \geq \frac{e^{-2 \log \mathcal{K}(T)/\mathcal{K}(T)}}{(2\pi)^{d/2} \det(\Sigma_T + \beta_T I_d + e^{-2bT} I_d)^{1/2}} \\ & \quad \cdot \exp \left\{ -\frac{1}{2} \left\| (\Sigma_T + e^{-2bT}(I_d + \beta_T \Sigma_T^{-1})^{-1})^{-1/2} (y - \mu_T(\beta_T)) \right\|^2 \right\}. \end{aligned}$$

981 The expression in the right-hand side can be simplified even further, if one uses the inequalities

$$(\Sigma_T + e^{-2bT}(I_d + \beta_T \Sigma_T^{-1})^{-1})^{-1} \preceq \Sigma_T^{-1} \quad \text{and} \quad \frac{\log u}{u} \leq e^{-1} \quad \text{for all } u > 0.$$

982 Then  $\log \mathcal{K}(T)/\mathcal{K}(T) \leq e^{-1}$ ,

$$\left\| (\Sigma_T + e^{-2bT}(I_d + \beta_T \Sigma_T^{-1})^{-1})^{-1/2} (y - \mu_T(\beta_T)) \right\|^2 \leq \left\| \Sigma_T^{-1/2} (y - \mu_T(\beta_T)) \right\|^2,$$

983 and it holds that

$$\int_{\mathbb{R}^d} e^{-\mathcal{A}(x,T)/\mathcal{K}(T)} \mathbf{q}(y|x) \rho_0(x) dx \geq \frac{e^{-2/e}}{(2\pi)^{d/2} \det(\Sigma_T + \beta_T I_d + e^{-2bT} I_d)^{1/2}} \quad (29)$$

$$\cdot \exp \left\{ -\frac{1}{2} \left\| \Sigma_T^{-1/2} (y - \mu_T(\beta_T)) \right\|^2 \right\}. \quad (30)$$

984 **Step 4: elaborating on the integrals ratio, part II (intermediate).** To bound the numerator

$$\int_{\mathbb{R}^d} (\mathcal{G}(x))^{1-1/\mathcal{K}(T)} e^{2\mathcal{A}(x,T)\mathcal{K}(T)+\mathcal{A}(x,T)/\mathcal{K}(T)} \mathbf{q}(y|x) \rho_0(x) dx,$$

985 we rely on the same ideas as in the previous step. However, before we proceed, let us make some

986 preparations. Namely, on this step we consider

$$2\mathcal{A}(x,T)\mathcal{K}(T) + \mathcal{A}(x,T)/\mathcal{K}(T).$$

987 Let us recall that, due to the definitions of  $\mathcal{A}(x,t)$  and  $\mathcal{K}(t)$  (see (20) and (21)), we have

$$\mathcal{A}(x,T) = \frac{be^2 \arcsin(e^{-bT})}{\sqrt{d}} \left\| \Sigma^{-1/2}(x - m) \right\|^2 + 2 \log \mathcal{K}(T).$$

988 Introducing

$$\alpha_T = \left( 2\mathcal{K}(T) + \frac{1}{\mathcal{K}(T)} \right) \frac{e^2 \arcsin(e^{-bT})(1 - e^{-2bT})}{\sqrt{d}} \leq (2\mathcal{K}(T) + 1) \frac{e^2 \arcsin(e^{-bT})}{\sqrt{d}}. \quad (31)$$

989 we obtain that

$$2\mathcal{A}(x,T)\mathcal{K}(T) + \frac{\mathcal{A}(x,T)}{\mathcal{K}(T)} = \frac{\alpha_T}{2} \left\| \Sigma_T^{-1/2}(x - m) \right\|^2 + 4\mathcal{K}(T) \log \mathcal{K}(T) + \frac{2 \log \mathcal{K}(T)}{\mathcal{K}(T)},$$



990 and then

$$\begin{aligned}
& \int_{\mathbb{R}^d} (\mathcal{G}(x))^{1-1/\mathcal{K}(T)} e^{2\mathcal{A}(x,T)\mathcal{K}(T)+\mathcal{A}(x,T)/\mathcal{K}(T)} \mathbf{q}(y|x) \rho_0(x) dx \\
&= e^{2\log \mathcal{K}(T)(2\mathcal{K}(T)+1/\mathcal{K}(T))} \int_{\mathbb{R}^d} (\mathcal{G}(x))^{1-1/\mathcal{K}(T)} e^{\alpha_T \|\Sigma_T^{-1/2}(x-m)\|^2/2} \mathbf{q}(y|x) \rho_0(x) dx \quad (32) \\
&\leq e^{4\log \mathcal{K}(T)\mathcal{K}(T)+2/e} \int_{\mathbb{R}^d} (\mathcal{G}(x))^{1-1/\mathcal{K}(T)} e^{\alpha_T \|\Sigma_T^{-1/2}(x-m)\|^2/2} \mathbf{q}(y|x) \rho_0(x) dx.
\end{aligned}$$

991 In the last line, we used the inequality  $\log u/u \leq 1/e$  for all  $u > 0$ . We are going to show that  
992  $\alpha_T \leq 40e^{-bT}$  under the conditions of the lemma. Let us first elaborate on  $1 - 1/\mathcal{K}(T)$  for this  
993 purpose. We start with the inequalities

$$u \leq \arcsin(u) \leq \frac{\pi u}{2} \quad \text{and} \quad u \leq -\log(1-u) \leq \frac{u}{1-u}$$

994 holding for all  $u \in (0, 1)$ . They yield that

$$e^{-bT} \leq \arcsin(e^{-bT}) \leq \frac{\pi e^{-bT}}{2} \quad \text{and} \quad e^{-2bT} \leq -\log(1 - e^{-2bT}) \leq \frac{e^{-2bT}}{1 - e^{-2bT}}$$

995 The right-hand side of the latter inequality can be simplified even further if one takes into account  
996 that  $bT \geq 5 + \log d \geq 5$ :

$$-\log(1 - e^{-2bT}) \leq \frac{e^{-2bT}}{1 - e^{-2bT}} \leq \frac{e^{-5-bT}}{1 - e^{-10}}.$$

997 This implies that

$$\begin{aligned}
\log \mathcal{K}(T) &= 2e^2 \sqrt{d} \arcsin(e^{-bT}) - 5e^2 \sqrt{d} \log(1 - e^{-2bT}) \\
&\leq e^2 \sqrt{d} e^{-bT} \left( \pi + \frac{5e^{-5}}{1 - e^{-10}} \right) \\
&\leq 4e^2 \sqrt{d} e^{-bT}.
\end{aligned} \quad (33)$$

998 Since  $bT \geq 5 + \log d$ , it holds that

$$4e^2 \sqrt{d} e^{-bT} \leq 4e^{-3} < \frac{1}{5}.$$

999 Then

$$\alpha_T \leq (2\mathcal{K}(T) + 1) \frac{e^2 \arcsin(e^{-bT})}{\sqrt{d}} \leq (2e^5 + 1) \frac{\pi e^2 e^{-bT}}{2} \leq 40e^{-bT}.$$

1000 Let us note that the assumption  $bT \geq \log(160b\|\Sigma^{-1}\|)$  ensures that

$$\alpha_T \leq 40e^{-bT} \leq \frac{1}{4b\|\Sigma^{-1}\|} \leq \frac{1}{2\|\Sigma_T^{-1}\|}. \quad (34)$$

1001 This fact will play an important role during the proof.

1002 **Step 5: elaborating on the integrals ratio, part III (numerator).** We move to an upper bound on

$$\int_{\mathbb{R}^d} (\mathcal{G}(x))^{1-1/\mathcal{K}(T)} e^{2\mathcal{A}(x,T)\mathcal{K}(T)+\mathcal{A}(x,T)/\mathcal{K}(T)} \mathbf{q}(y|x) \rho_0(x) dx.$$

1003 As in the previous step, the idea is to represent the integral of interest as an expectation of a function  
1004 of a Gaussian random vector and use Lemma D.2. Let us recall that (see (32))

$$\begin{aligned}
& \int_{\mathbb{R}^d} (\mathcal{G}(x))^{1-1/\mathcal{K}(T)} e^{2\mathcal{A}(x,T)\mathcal{K}(T)+\mathcal{A}(x,T)/\mathcal{K}(T)} \mathbf{q}(y|x) \rho_0(x) dx \\
&\leq e^{4\log \mathcal{K}(T)\mathcal{K}(T)+2/e} \int_{\mathbb{R}^d} (\mathcal{G}(x))^{1-1/\mathcal{K}(T)} e^{\alpha_T \|\Sigma_T^{-1/2}(x-m)\|^2/2} \mathbf{q}(y|x) \rho_0(x) dx.
\end{aligned}$$

1005 Similarly to the third step, we note that

$$\begin{aligned} -\alpha_T \left\| \Sigma_T^{-1/2}(x-m) \right\|^2 + \|x\|^2 &= x^\top (I_d - \alpha_T \Sigma_T^{-1}) x + 2\alpha_T x^\top \Sigma_T^{-1} m - \alpha_T \left\| \Sigma_T^{-1/2} m \right\|^2 \\ &= \left\| (I_d - \alpha_T \Sigma_T^{-1})^{1/2} (x + \alpha_T (\Sigma_T - \alpha_T I_d)^{-1} m) \right\|^2 \\ &\quad - \alpha_T \left\| \Sigma_T^{-1/2} m \right\|^2 + \alpha_T^2 \left\| (I_d - \alpha_T \Sigma_T^{-1})^{-1/2} \Sigma_T^{-1} m \right\|^2 \end{aligned}$$

1006 and

$$-\alpha_T \left\| \Sigma_T^{-1/2} m \right\|^2 + \alpha_T^2 \left\| (I_d - \alpha_T \Sigma_T^{-1})^{-1/2} \Sigma_T^{-1} m \right\|^2 = -\alpha_T \left\| (\Sigma_T - \alpha_T I_d)^{-1/2} m \right\|^2.$$

1007 We would like to emphasize that  $\Sigma_T - \alpha_T I_d \succeq 0.5 \Sigma_T$  due to (34). Then

$$\begin{aligned} -\alpha_T \left\| \Sigma_T^{-1/2}(x-m) \right\|^2 - 2 \log \rho_0(x) &= \left\| (I_d - \alpha_T \Sigma_T^{-1})^{1/2} (x + \alpha_T (\Sigma_T - \alpha_T I_d)^{-1} \Sigma_T^{-1} m) \right\|^2 \\ &\quad - \alpha_T \left\| (\Sigma_T - \alpha_T I_d)^{-1/2} m \right\|^2, \end{aligned}$$

1008 and we conclude that

$$\det(I_d - \alpha_T \Sigma_T^{-1})^{-1/2} \exp \left\{ \frac{\alpha_T}{2} \left\| \Sigma_T^{-1/2}(x-m) \right\|^2 + \frac{\alpha_T}{2} \left\| (\Sigma_T - \alpha_T I_d)^{-1/2} m \right\|^2 \right\} \rho_0(x)$$

1009 is the density of the Gaussian distribution

$$\mathcal{N} \left( -\alpha_T (\Sigma_T - \alpha_T I_d)^{-1} m, (I_d - \alpha_T \Sigma_T^{-1})^{-1} \right).$$

1010 According to Lemma D.2, it holds that

$$\begin{aligned} &\int_{\mathbb{R}^d} (\mathcal{G}(x))^{1-1/\mathcal{K}(T)} e^{2\mathcal{A}(x,T)\mathcal{K}(T)+\mathcal{A}(x,T)/\mathcal{K}(T)} \mathbf{q}(y|x) \rho_0(x) dx \\ &= \frac{e^{4\mathcal{K}(T) \log \mathcal{K}(T)+2/e} \det(I_d - \alpha_T \Sigma_T^{-1})^{1/2}}{(2\pi)^{d/2} \det(\Sigma_T + e^{-2bT} (I_d - \alpha_T \Sigma_T^{-1})^{-1})^{1/2}} \exp \left\{ -\frac{\alpha_T}{2} \left\| (\Sigma_T - \alpha_T I_d)^{-1/2} m \right\|^2 \right\} \\ &\quad \cdot \exp \left\{ -\frac{1}{2} \left\| \left( \Sigma_T + e^{-2bT} (I_d - \alpha_T \Sigma_T^{-1})^{-1} \right)^{-1/2} (y - \mu_T(-\alpha_T)) \right\|^2 \right\} \mathbb{E}(\mathcal{G}(\xi))^{1-1/\mathcal{K}(T)} \\ &\leq \frac{e^{4\mathcal{K}(T) \log \mathcal{K}(T)+2/e}}{(2\pi)^{d/2} \det(\Sigma_T - \alpha_T I_d + e^{-2bT} I_d)^{1/2}} \cdot \mathbb{E}(\mathcal{G}(\xi))^{1-1/\mathcal{K}(T)} \\ &\quad \cdot \exp \left\{ -\frac{1}{2} \left\| \left( \Sigma_T + e^{-2bT} (I_d - \alpha_T \Sigma_T^{-1})^{-1} \right)^{-1/2} (y - \mu_T(-\alpha_T)) \right\|^2 \right\}, \end{aligned} \tag{35}$$

1011 where

$$\mu_T(-\alpha_T) = m_T(-\alpha_T(\Sigma_T - \alpha_T I_d)^{-1} m) \tag{36}$$

1012 and  $\xi \sim \mathcal{N}(\check{\mu}, \check{\Omega})$  is a Gaussian random vector with mean

$$\begin{aligned} \check{\mu} &= -\alpha_T (\Sigma_T - \alpha_T I_d)^{-1} m \\ &\quad + e^{-bT} (I_d - \alpha_T \Sigma_T^{-1})^{-1} \left( \Sigma_T + e^{-2bT} (I_d - \alpha_T \Sigma_T^{-1})^{-1} \right)^{-1} (y - \mu_T(-\alpha_T)) \end{aligned} \tag{37}$$

1013 and covariance

$$\check{\Omega} = (I_d - \alpha_T \Sigma_T^{-1} + e^{-2bT} \Sigma_T^{-1})^{-1}. \tag{38}$$

1014 **Step 6: bounding  $\mathbb{E}(\mathcal{G}(\xi))^{1-1/\mathcal{K}(T)}$ .** Using (33), we easily derive

$$1 - \frac{1}{\mathcal{K}(T)} = 1 - e^{-\log \mathcal{K}(T)} \leq \log \mathcal{K}(T) \leq 4e^2 \sqrt{d} e^{-bT}.$$

1015 Let us recall that

$$\begin{aligned}\mathcal{G}(x) &= Be^M + \frac{Ae^M}{2} \left\| \Sigma^{-1/2}(x - m) \right\|^2 + \frac{Ae^M}{8b} (400d + d^2) \\ &= Be^M + \frac{Ae^M(1 - e^{-2bt})}{4b} \left\| \Sigma_t^{-1/2}(x - m) \right\|^2 + \frac{Ae^M}{8b} (400d + d^2).\end{aligned}$$

1016 Since  $1 - 1/\mathcal{K}(T) \leq 4e^2\sqrt{d}e^{-bT} < 1$ , it holds that

$$\begin{aligned}\mathbb{E}(\mathcal{G}(\xi))^{1-1/\mathcal{K}(T)} &\leq e^{M-M/\mathcal{K}(T)} \left( B + \frac{A}{8b} (400d + d^2) \right)^{1-1/\mathcal{K}(T)} \\ &\quad + \left( \frac{Ae^M(1 - e^{-2bT})}{4b} \mathbb{E} \left\| \Sigma_T^{-1/2}(\xi - m) \right\|^2 \right)^{1-1/\mathcal{K}(T)} \\ &\lesssim e^{\mathcal{O}((M+\log B)\sqrt{d}e^{-bT})} + \left( \frac{Ae^M}{b} \right)^{\mathcal{O}(\sqrt{d}e^{-bT})} \left( d^2 + \mathbb{E} \left\| \Sigma_T^{-1/2}(\xi - m) \right\|^2 \right)^{1-1/\mathcal{K}(T)}.\end{aligned}\tag{39}$$

1017 One can compute the expectation in the right-hand side explicitly:

$$\mathbb{E} \left\| \Sigma_T^{-1/2}(\xi - m) \right\|^2 = \text{Tr} \left( \Sigma_T^{-1} \check{\Omega} \right) + \left\| \Sigma_T^{-1/2}(\check{\mu} - m) \right\|^2$$

1018 Due to the definitions of  $\mu_T(-\alpha_T)$  and  $m_T(\cdot)$  (see (36) and (4)), we have

$$\mu_T(-\alpha_T) - m = e^{-bT} (-\alpha_T(\Sigma_T - \alpha_T I_d)^{-1} m - m).$$

1019 This yields that

$$\begin{aligned}\check{\mu} - m &= (1 - e^{-bT}) (-\alpha_T(\Sigma_T - \alpha_T I_d)^{-1} m - m) \\ &\quad + e^{-bT} (I_d - \alpha_T \Sigma_T^{-1})^{-1} \left( \Sigma_T + e^{-2bT} (I_d - \alpha_T \Sigma_T^{-1})^{-1} \right)^{-1} (y - m) \\ &= -(1 - e^{-bT}) (I_d - \alpha_T \Sigma_T^{-1})^{-1} m + e^{-bT} (\Sigma_T - \alpha_T I_d + e^{-2bT} I_d)^{-1} (y - m).\end{aligned}$$

1020 The conditions of the lemma and (34) ensure that

$$\alpha_T \leq \frac{1}{2\|\Sigma_T^{-1}\|} \quad \text{and} \quad e^{-2bT} \leq \frac{1}{\|\Sigma_T^{-1}\|}.$$

1021 Then, due to the Cauchy-Schwarz inequality, we have

$$\begin{aligned}\left\| \Sigma_T^{-1/2}(\check{\mu} - m) \right\|^2 &\leq 2 \left\| (1 - e^{-bT}) (I_d - \alpha_T \Sigma_T^{-1})^{-1} \Sigma_T^{-1/2} m \right\|^2 \\ &\quad + 2e^{-2bT} \left\| (\Sigma_T - \alpha_T I_d + e^{-2bT} I_d)^{-1} \Sigma_T^{-1/2} (y - m) \right\|^2 \\ &\leq 8 \left\| \Sigma_T^{-1/2} m \right\|^2 + 8e^{-2bT} \left\| \Sigma_T^{-3/2} (y - m) \right\|^2 \\ &\leq 8 \left\| \Sigma_T^{-1/2} m \right\|^2 + 8 \left\| \Sigma_T^{-1/2} (y - m) \right\|^2.\end{aligned}\tag{40}$$

1022 On the other hand,

$$\begin{aligned}\text{Tr} \left( \Sigma_T^{-1} \check{\Omega} \right) &= \text{Tr} \left( \Sigma_T^{-1} (I_d - \alpha_T \Sigma_T^{-1} + e^{-2bT} \Sigma_T^{-1})^{-1} \right) \\ &= \text{Tr} \left( (\Sigma_T - \alpha_T I_d + e^{-2bT} I_d)^{-1} \right) \\ &\leq 2\text{Tr}(\Sigma_T^{-1}).\end{aligned}\tag{41}$$

1023 Substituting (40) and (41) into (39), we obtain that

$$\begin{aligned}\mathbb{E}(\mathcal{G}(\xi))^{1-1/\mathcal{K}(T)} &\lesssim e^{\mathcal{O}((M+\log B)\sqrt{d}e^{-bT})} + \left( \frac{Ae^M}{b} \right)^{\mathcal{O}(\sqrt{d}e^{-bT})} \left( d^2 + \mathbb{E} \left\| \Sigma_T^{-1/2}(\xi - m) \right\|^2 \right)^{1-1/\mathcal{K}(T)} \\ &\lesssim e^{\mathcal{O}((M+\log B)\sqrt{d}e^{-bT})} + \left( \frac{Ae^M}{b} \right)^{\mathcal{O}(\sqrt{d}e^{-bT})} \left( d^2 + \left\| \Sigma_T^{-1/2}(y - m) \right\|^2 \right)^{1-1/\mathcal{K}(T)} \\ &\lesssim e^{\mathcal{O}((M+\log B)\sqrt{d}e^{-bT})} + \left( \frac{Ae^M}{b} \right)^{\mathcal{O}(\sqrt{d}e^{-bT})} \left( d^2 + b \left\| \Sigma_T^{-1/2}(y - m) \right\|^2 \right)^{1-1/\mathcal{K}(T)}.\end{aligned}\tag{42}$$

1024 **Step 7: bounding the integrals ratio.** Summing up (29) and (35), we obtain that

$$\begin{aligned}
& \left( \int_{\mathbb{R}^d} \frac{e^{2\mathcal{A}(x,T)\mathcal{K}(T)+\mathcal{A}(x,T)/\mathcal{K}(T)} \mathbf{q}(y|x)}{(\mathcal{G}(x))^{1/\mathcal{K}(T)-1}} \rho_0(x) dx \right) \bigg/ \left( \int_{\mathbb{R}^d} e^{-\mathcal{A}(x,T)/\mathcal{K}(T)} \mathbf{q}(y|x) \rho_0(x) dx \right) \\
& \leq \frac{e^{4 \log \mathcal{K}(T) \mathcal{K}(T) + 4/e} \det(\Sigma_T + \beta_T I_d + e^{-2bT} I_d)^{1/2}}{\det(\Sigma_T - \alpha_T I_d + e^{-2bT} I_d)^{1/2}} \mathbb{E}(\mathcal{G}(\xi))^{1-1/\mathcal{K}(T)} \\
& \quad \cdot \exp \left\{ -\frac{1}{2} \left\| \left( \Sigma_T + e^{-2bT} (I_d - \alpha_T \Sigma_T^{-1})^{-1} \right)^{-1/2} (y - \mu_T(-\alpha_T)) \right\|^2 \right\} \\
& \quad \cdot \exp \left\{ \frac{1}{2} \left\| \Sigma_T^{-1/2} (y - \mu_T(\beta_T)) \right\|^2 \right\}.
\end{aligned}$$

1025 Due to the definitions of  $\alpha_T$  and  $\beta_T$  (see (31) and (27) respectively) and (34), we have

$$\beta_T \leq \alpha_T \leq 40e^{-bT} \leq \frac{1}{2\|\Sigma_T^{-1}\|}. \quad (43)$$

1026 This implies that

$$\frac{\det(\Sigma_T + \beta_T I_d + e^{-2bT} I_d)^{1/2}}{\det(\Sigma_T - \alpha_T I_d + e^{-2bT} I_d)^{1/2}} \leq \frac{\det(1.5\Sigma_T + e^{-2bT} I_d)^{1/2}}{\det(0.5\Sigma_T + e^{-2bT} I_d)^{1/2}} \leq 3^d.$$

1027 Taking into account that  $\mathcal{K}(T) \log \mathcal{K}(T) = \mathcal{O}(\sqrt{d}e^{-bT})$ , we deduce that

$$\begin{aligned}
& \left( \int_{\mathbb{R}^d} \frac{e^{2\mathcal{A}(x,T)\mathcal{K}(T)+\mathcal{A}(x,T)/\mathcal{K}(T)} \mathbf{q}(y|x)}{(\mathcal{G}(x))^{1/\mathcal{K}(T)-1}} \rho_0(x) dx \right) \bigg/ \left( \int_{\mathbb{R}^d} e^{-\mathcal{A}(x,T)/\mathcal{K}(T)} \mathbf{q}(y|x) \rho_0(x) dx \right) \\
& \leq e^{\mathcal{O}(d)} \mathbb{E}(\mathcal{G}(\xi))^{1-1/\mathcal{K}(T)} \\
& \quad \cdot \exp \left\{ -\frac{1}{2} \left\| \left( \Sigma_T + e^{-2bT} (I_d - \alpha_T \Sigma_T^{-1})^{-1} \right)^{-1/2} (y - \mu_T(-\alpha_T)) \right\|^2 \right\} \\
& \quad \cdot \exp \left\{ \frac{1}{2} \left\| \Sigma_T^{-1/2} (y - \mu_T(\beta_T)) \right\|^2 \right\}.
\end{aligned} \quad (44)$$

1028 Let us consider the difference

$$\frac{1}{2} \left\| \Sigma_T^{-1/2} (y - \mu_T(\beta_T)) \right\|^2 - \frac{1}{2} \left\| \left( \Sigma_T + e^{-2bT} (I_d - \alpha_T \Sigma_T^{-1})^{-1} \right)^{-1/2} (y - \mu_T(-\alpha_T)) \right\|^2.$$

1029 It holds that

$$\begin{aligned}
& \frac{1}{2} \left\| \Sigma_T^{-1/2} (y - \mu_T(\beta_T)) \right\|^2 - \frac{1}{2} \left\| \left( \Sigma_T + e^{-2bT} (I_d - \alpha_T \Sigma_T^{-1})^{-1} \right)^{-1/2} (y - \mu_T(-\alpha_T)) \right\|^2 \\
& = \frac{1}{2} (y - m)^\top \Sigma_T^{-1} (y - m) + (y - m)^\top \Sigma_T^{-1} (m - \mu_T(\beta_T)) + \frac{1}{2} \left\| \Sigma_T^{-1/2} (m - \mu_T(\beta_T)) \right\|^2 \\
& \quad - \frac{1}{2} (y - m)^\top \left( \Sigma_T + e^{-2bT} (I_d - \alpha_T \Sigma_T^{-1})^{-1} \right)^{-1} (y - m) \\
& \quad - (y - m)^\top \left( \Sigma_T + e^{-2bT} (I_d - \alpha_T \Sigma_T^{-1})^{-1} \right)^{-1} (m - \mu_T(-\alpha_T)) \\
& \quad - \frac{1}{2} \left\| \left( \Sigma_T + e^{-2bT} (I_d - \alpha_T \Sigma_T^{-1})^{-1} \right)^{-1/2} (m - \mu_T(-\alpha_T)) \right\|^2.
\end{aligned}$$

1030 We can simplify the expression in the right-hand side noting that

$$\begin{aligned}
& \Sigma_T^{-1} - \left( \Sigma_T + e^{-2bT} (I_d - \alpha_T \Sigma_T^{-1})^{-1} \right)^{-1} \\
&= \Sigma_T^{-1} \left( I_d - \left( I_d + e^{-2bT} (\Sigma_T - \alpha_T I_d)^{-1} \right)^{-1} \right) \\
&= e^{-2bT} \Sigma_T^{-1} (\Sigma_T - \alpha_T I_d)^{-1} \left( I_d + e^{-2bT} (\Sigma_T - \alpha_T I_d)^{-1} \right)^{-1} \\
&= e^{-2bT} \Sigma_T^{-1} (\Sigma_T - \alpha_T I_d + e^{-2bT})^{-1} \preceq 2e^{-2bT} \Sigma_T^{-2}.
\end{aligned}$$

1031 Then

$$\begin{aligned}
& (y - m)^\top \Sigma_T^{-1} (y - m) - (y - m)^\top \left( \Sigma_T + e^{-2bT} (I_d - \alpha_T \Sigma_T^{-1})^{-1} \right)^{-1} (y - m) \\
& \leq 2e^{-2bT} (y - m)^\top \Sigma_T^{-2} (y - m)
\end{aligned}$$

1032 and

$$\begin{aligned}
& (y - m)^\top \left[ \left( \Sigma_T + e^{-2bT} (I_d - \alpha_T \Sigma_T^{-1})^{-1} \right)^{-1} - \Sigma_T^{-1} \right] (m - \mu_T(-\alpha_T)) \\
& e^{-2bT} (y - m)^\top \Sigma_T^{-1} (\Sigma_T - \alpha_T I_d + e^{-2bT})^{-1} (m - \mu_T(-\alpha_T)) \\
& \leq e^{-2bT} \|\Sigma_T^{-1} (y - m)\| \left\| (\Sigma_T - \alpha_T I_d + e^{-2bT})^{-1} (m - \mu_T(-\alpha_T)) \right\| \\
& \leq 2e^{-2bT} \|\Sigma_T^{-1} (y - m)\| \|\Sigma_T^{-1} (m - \mu_T(-\alpha_T))\|.
\end{aligned}$$

1033 Thus, we obtain that

$$\begin{aligned}
& \frac{1}{2} \left\| \Sigma_T^{-1/2} (y - \mu_T(\beta_T)) \right\|^2 - \frac{1}{2} \left\| \left( \Sigma_T + e^{-2bT} (I_d - \alpha_T \Sigma_T^{-1})^{-1} \right)^{-1/2} (y - \mu_T(-\alpha_T)) \right\|^2 \\
& \leq e^{-2bT} \left\| \Sigma_T^{-1} (y - m) \right\|^2 + (y - m)^\top \Sigma_T^{-1} (\mu_T(-\alpha_T) - \mu_T(\beta_T)) + \frac{1}{2} \left\| \Sigma_T^{-1/2} (m - \mu_T(\beta_T)) \right\|^2 \\
& \quad + 2e^{-2bT} \left\| \Sigma_T^{-1} (y - m) \right\| \left\| \Sigma_T^{-1} (m - \mu_T(-\alpha_T)) \right\|.
\end{aligned}$$

1034 Due to the Cauchy-Schwarz inequality, the right-hand side does not exceed

$$\begin{aligned}
& 2e^{-2bT} \left\| \Sigma_T^{-1} (y - m) \right\|^2 + (y - m)^\top \Sigma_T^{-1} (\mu_T(-\alpha_T) - \mu_T(\beta_T)) \\
& \quad + \frac{1}{2} \left\| \Sigma_T^{-1/2} (m - \mu_T(\beta_T)) \right\|^2 + e^{-2bT} \left\| \Sigma_T^{-1} (m - \mu_T(-\alpha_T)) \right\|^2.
\end{aligned}$$

1035 Since

$$\begin{aligned}
\Sigma_T^{-1} (\mu_T(\beta_T) - \mu_T(-\alpha_T)) &= e^{-bT} \Sigma_T^{-1} (\beta_T (\Sigma_T + \beta_T I_d)^{-1} - \alpha_T (\Sigma_T - \alpha_T I_d)^{-1}) m \\
&= (\alpha_T + \beta_T) (\Sigma_T + \beta_T I_d)^{-1} (\Sigma_T - \alpha_T I_d)^{-1} m,
\end{aligned}$$

1036 we have

$$\begin{aligned}
& (y - m)^\top \Sigma_T^{-1} (\mu_T(-\alpha_T) - \mu_T(\beta_T)) \\
&= e^{-bT} (\alpha_T + \beta_T) (y - m)^\top (\Sigma_T + \beta_T I_d)^{-1} (\Sigma_T - \alpha_T I_d)^{-1} m \\
&\leq e^{-bT} (\alpha_T + \beta_T) \left\| (\Sigma_T + \beta_T I_d)^{-1} (y - m) \right\| \left\| (\Sigma_T - \alpha_T I_d)^{-1} m \right\| \\
&\leq 2e^{-bT} (\alpha_T + \beta_T) \left\| \Sigma_T^{-1} (y - m) \right\| \left\| \Sigma_T^{-1} m \right\|.
\end{aligned}$$

1037 The inequality (43) yields that

$$\begin{aligned}
& 2e^{-bT} (\alpha_T + \beta_T) \left\| \Sigma_T^{-1} (y - m) \right\| \left\| \Sigma_T^{-1} m \right\| \\
&\leq 2e^{-bT} \left\| \Sigma_T^{-1/2} (y - m) \right\| \left\| \Sigma_T^{-1} m \right\| \\
&\leq e^{-bT} \left\| \Sigma_T^{-1/2} (y - m) \right\|^2 + e^{-bT} \left\| \Sigma_T^{-1} m \right\|^2.
\end{aligned}$$

1038 Hence, we obtain that

$$\begin{aligned}
& \frac{1}{2} \left\| \Sigma_T^{-1/2} (y - \mu_T(\beta_T)) \right\|^2 - \frac{1}{2} \left\| \left( \Sigma_T + e^{-2bT} (I_d - \alpha_T \Sigma_T^{-1})^{-1} \right)^{-1/2} (y - \mu_T(-\alpha_T)) \right\|^2 \\
& \leq 2e^{-2bT} \left\| \Sigma_T^{-1} (y - m) \right\|^2 + e^{-bT} \left\| \Sigma_T^{-1/2} (y - m) \right\|^2 + e^{-bT} \left\| \Sigma_T^{-1} m \right\|^2 \\
& \quad + \frac{1}{2} \left\| \Sigma_T^{-1/2} (m - \mu_T(\beta_T)) \right\|^2 + e^{-2bT} \left\| \Sigma_T^{-1} (m - \mu_T(-\alpha_T)) \right\|^2 \\
& \leq 3e^{-bT} \left\| \Sigma_T^{-1/2} (y - m) \right\|^2 + \mathcal{O}(e^{-bT}).
\end{aligned} \tag{45}$$

1039 In the last line, we used the inequality  $e^{-bT} \|\Sigma^{-1}\| \leq 1$ .

1040 **Step 8: final bound.** The inequalities (42), (44), and (45), we deduce that

$$\begin{aligned}
& \left( \int_{\mathbb{R}^d} \frac{e^{2\mathcal{A}(x,T)\mathcal{K}(T) + \mathcal{A}(x,T)/\mathcal{K}(T)} \mathbf{q}(y|x)}{(\mathcal{G}(x))^{1/\mathcal{K}(T)-1}} \rho_0(x) dx \right) / \left( \int_{\mathbb{R}^d} e^{-\mathcal{A}(x,T)/\mathcal{K}(T)} \mathbf{q}(y|x) \rho_0(x) dx \right) \\
& \lesssim e^{\mathcal{O}(d+M\sqrt{d}e^{-bT})} (A \vee B)^{\mathcal{O}(\sqrt{d}e^{-bT})} \left( d^2 + \left\| \Sigma^{-1/2} (y - m) \right\|^2 \right)^{1-1/\mathcal{K}(T)} \\
& \quad \cdot \exp \left\{ 3e^{-bT} \left\| \Sigma_T^{-1/2} (y - m) \right\|^2 + \mathcal{O}(e^{-bT}) \right\}.
\end{aligned}$$

1041 This, together with (26) yields that

$$\begin{aligned}
& \left| \frac{dF(s)}{ds} \right| \lesssim e^{2M\mathcal{K}(t)-M} (\mathcal{T}_\infty |f_1 - f_0|)^{1/\mathcal{K}(T)} \\
& \quad \cdot e^{\mathcal{O}(d+(M+\log(A \vee B))\sqrt{d}e^{-bT})} \left( d^2 + \left\| \Sigma^{-1/2} (y - m) \right\|^2 \right)^{1-1/\mathcal{K}(T)} \\
& \quad \cdot \exp \left\{ 3e^{-bT} \left\| \Sigma_T^{-1/2} (y - m) \right\|^2 + \mathcal{O}(e^{-bT}) \right\}.
\end{aligned}$$

1042 Finally, taking into account that  $\mathcal{K}(T) = 1 + \mathcal{O}(\sqrt{d}e^{-bT})$ , we conclude that

$$\begin{aligned}
& \left| \frac{dF(s)}{ds} \right| \lesssim (\mathcal{T}_\infty |f_1 - f_0|)^{1/\mathcal{K}(T)} \left( d^2 + \left\| \Sigma^{-1/2} (y - m) \right\|^2 \right)^{1-1/\mathcal{K}(T)} \\
& \quad \cdot \exp \left\{ \mathcal{O}(d + (M + \log(A \vee B))\sqrt{d}e^{-bT}) \right\} \\
& \quad \cdot \exp \left\{ 3e^{-bT} \left\| \Sigma_T^{-1/2} (y - m) \right\|^2 + \mathcal{O}(e^{-bT}) \right\},
\end{aligned}$$

1043 and the claim follows.

1044

□

### 1045 B.3 Proof of Lemma B.3

1046 The proof of the lemma is quite cumbersome. For this reason, we split it into several steps for reader's  
1047 convenience.

1048 **Step 1: Kolmogorov-Fokker-Planck equation.** Let us note that  $\mathcal{T}_t(g(x)e^{f(x)})$  satisfies the  
1049 Kolmogorov-Fokker-Planck equation, that is,

$$\frac{\partial \mathcal{T}_t(g(x)e^{f(x)})}{\partial t} = -b(x - m)^\top \nabla \mathcal{T}_t(g(x)e^{f(x)}) + \frac{1}{2} \text{Tr} \left( \Sigma \nabla^2 \mathcal{T}_t(g(x)e^{f(x)}) \right). \tag{46}$$

1050 To simplify the expressions in the right-hand side, we represent both

$$(x - m)^\top \nabla \mathcal{T}_t(g(x)e^{f(x)}) \quad \text{and} \quad \text{Tr} \left( \Sigma \nabla^2 \mathcal{T}_t(g(x)e^{f(x)}) \right)$$

1051 as expectations of functions of a Gaussian random vector. Indeed, direct computation yields that

$$\begin{aligned}\nabla \mathcal{T}_t(g(x)e^{f(x)}) &= \frac{e^{-bt}}{(2\pi)^{d/2}\sqrt{\det(\Sigma_t)}} \int_{\mathbb{R}^d} \Sigma_t^{-1}(y - m_t(x))g(y) \\ &\quad \cdot \exp\left\{f(y) - \frac{1}{2}\left\|\Sigma_t^{-1/2}(y - m_t(x))\right\|^2\right\} dy \\ &= e^{-bt} \mathbb{E}_{\eta \sim \mathcal{N}(m_t(x), \Sigma_t)} \left[ \Sigma_t^{-1}(\eta - m_t(x))g(\eta)e^{f(\eta)} \right].\end{aligned}$$

1052 Similarly, for the Hessian of  $\mathcal{T}_t(g(x)e^{f(x)})$  it holds that

$$\begin{aligned}\nabla^2 \mathcal{T}_t(g(x)e^{f(x)}) &= \frac{e^{-2bt}}{(2\pi)^{d/2}\sqrt{\det(\Sigma_t)}} \int_{\mathbb{R}^d} \left( \Sigma_t^{-1}(y - m_t(x))(y - m_t(x))^\top \Sigma_t^{-1} - \Sigma_t^{-1} \right) g(y) \\ &\quad \cdot \exp\left\{f(y) - \frac{1}{2}\left\|\Sigma_t^{-1/2}(y - m_t(x))\right\|^2\right\} dy.\end{aligned}$$

1053 Taking into account the relation  $\Sigma_t = (1 - e^{-2bt})\Sigma/(2b)$ , it is straightforward to observe that  
1054  $\text{Tr}(\Sigma \nabla^2 \mathcal{Z}_t(x))$  equals to

$$\frac{2be^{-2bt}}{1 - e^{-2bt}} \mathbb{E}_{\eta \sim \mathcal{N}(m_t(x), \Sigma_t)} \left[ \left( \left\| \Sigma_t^{-1/2}(\eta - m_t(x)) \right\|^2 - d \right) g(\eta)e^{f(\eta)} \right].$$

1055 Then the Kolmogorov-Fokker-Planck equation (46) and the triangle inequality imply that

$$\begin{aligned}\left| \frac{\partial \mathcal{T}_t(g(x)e^{f(x)})}{\partial t} \right| &\leq be^{-bt} \left| \mathbb{E}_{\eta \sim \mathcal{N}(m_t(x), \Sigma_t)} \left[ (x - m)^\top \Sigma_t^{-1}(\eta - m_t(x))g(\eta)e^{f(\eta)} \right] \right| \\ &\quad + \frac{be^{-2bt}}{1 - e^{-2bt}} \left| \mathbb{E}_{\eta \sim \mathcal{N}(m_t(x), \Sigma_t)} \left[ \left( \left\| \Sigma_t^{-1/2}(\eta - m_t(x)) \right\|^2 - d \right) g(\eta)e^{f(\eta)} \right] \right|.\end{aligned}\tag{47}$$

1056 **Step 2: Hölder's inequality.** Let us fix arbitrary  $x \in \mathbb{R}^d$  and  $t > 0$  and let  $p \geq 2$  be a parameter  
1057 to be specified later. Applying Hölder's inequality, we obtain that

$$\begin{aligned}&\left| \mathbb{E}_{\eta \sim \mathcal{N}(m_t(x), \Sigma_t)} \left[ (x - m)^\top \Sigma_t^{-1}(\eta - m_t(x))g(\eta)e^{f(\eta)} \right] \right| \\ &= \left| \mathbb{E}_{\eta \sim \mathcal{N}(m_t(x), \Sigma_t)} \left[ (x - m)^\top \Sigma_t^{-1}(\eta - m_t(x)) \left( g(\eta)e^{f(\eta)} \right)^{\frac{2}{p}} \cdot \left( g(\eta)e^{f(\eta)} \right)^{1 - \frac{2}{p}} \right] \right| \\ &\leq \left( \mathbb{E} \left| (x - m)^\top \Sigma_t^{-1}(\eta - m_t(x)) \right|^p \right)^{\frac{1}{p}} \left( \mathbb{E} g^2(\eta) e^{2f(\eta)} \right)^{\frac{1}{p}} \left( \mathbb{E} g(\eta) e^{f(\eta)} \right)^{1 - \frac{2}{p}}.\end{aligned}$$

1058 The expression in the right-hand side is nothing but

$$\left( \mathbb{E} \left| (x - m)^\top \Sigma_t^{-1}(\eta - m_t(x)) \right|^p \right)^{\frac{1}{p}} \left( \mathcal{T}_t g^2(x) e^{2f(x)} \right)^{\frac{1}{p}} \left( \mathcal{T}_t g(x) e^{f(x)} \right)^{1 - \frac{2}{p}}.$$

1059 Thus, we showed that

$$\begin{aligned}&\left| \mathbb{E}_{\eta \sim \mathcal{N}(m_t(x), \Sigma_t)} \left[ (x - m)^\top \Sigma_t^{-1}(\eta - m_t(x))g(\eta)e^{f(\eta)} \right] \right| \\ &\leq \left( \mathbb{E}_{\eta \sim \mathcal{N}(m_t(x), \Sigma_t)} \left| (x - m)^\top \Sigma_t^{-1}(\eta - m_t(x)) \right|^p \right)^{\frac{1}{p}} \left( \mathcal{T}_t g^2(x) e^{2f(x)} \right)^{\frac{1}{p}} \left( \mathcal{T}_t g(x) e^{f(x)} \right)^{1 - \frac{2}{p}} \\ &= \left( \mathbb{E}_{\xi \sim \mathcal{N}(0, I_d)} \left| (x - m)^\top \Sigma_t^{-1/2} \xi \right|^p \right)^{\frac{1}{p}} \left( \mathcal{T}_t g^2(x) e^{2f(x)} \right)^{\frac{1}{p}} \left( \mathcal{T}_t g(x) e^{f(x)} \right)^{1 - \frac{2}{p}}.\end{aligned}\tag{48}$$

1060 An upper bound on the absolute value of

$$\mathbb{E}_{\eta \sim \mathcal{N}(m_t(x), \Sigma_t)} \left[ \left( \left\| \Sigma_t^{-1/2}(\eta - m_t(x)) \right\|^2 - d \right) g(\eta)e^{f(\eta)} \right]$$

1061 can be derived in a similar way. With the same  $p \geq 2$ , it holds that

$$\begin{aligned}
& \left| \mathbb{E}_{\eta \sim \mathcal{N}(m_t(x), \Sigma_t)} \left[ \left( \left\| \Sigma_t^{-1/2} (\eta - m_t(x)) \right\|^2 - d \right) g(\eta) e^{f(\eta)} \right] \right| \\
& \leq \left( \mathbb{E}_{\eta \sim \mathcal{N}(m_t(x), \Sigma_t)} \left\| \Sigma_t^{-1/2} (\eta - m_t(x)) \right\|^2 - d \right)^{\frac{1}{p}} \left( \mathcal{T}_t g^2(x) e^{2f(x)} \right)^{\frac{1}{p}} \left( \mathbb{E} g(x) e^{f(x)} \right)^{1 - \frac{2}{p}} \\
& = \left( \mathbb{E}_{\xi \sim \mathcal{N}(0, I_d)} \left\| \xi \right\|^2 - d \right)^{\frac{1}{p}} \left( \mathcal{T}_t g^2(x) e^{2f(x)} \right)^{\frac{1}{p}} \left( \mathcal{T}_t g(x) e^{f(x)} \right)^{1 - \frac{2}{p}}. \tag{49}
\end{aligned}$$

1062 Summing up the inequalities (47), (48), and (49), we conclude that

$$\begin{aligned}
\left| \frac{\partial \mathcal{T}_t(g(x) e^{f(x)})}{\partial t} \right| & \leq b e^{-bt} \left( \mathbb{E}_{\xi \sim \mathcal{N}(0, I_d)} \left| (x - m)^\top \Sigma_t^{-1/2} \xi \right|^p \right)^{\frac{1}{p}} \left( \mathcal{T}_t g^2(x) e^{2f(x)} \right)^{\frac{1}{p}} \left( \mathcal{T}_t g(x) e^{f(x)} \right)^{1 - \frac{2}{p}} \\
& + \frac{b e^{-2bt}}{1 - e^{-2bt}} \left( \mathbb{E}_{\xi \sim \mathcal{N}(0, I_d)} \left\| \xi \right\|^2 - d \right)^{\frac{1}{p}} \left( \mathcal{T}_t g^2(x) e^{2f(x)} \right)^{\frac{1}{p}} \left( \mathcal{T}_t g(x) e^{f(x)} \right)^{1 - \frac{2}{p}}. \tag{50}
\end{aligned}$$

1063 **Step 3: properties of Gaussian random vectors.** Let us elaborate on  $\mathbb{E}_{\xi \sim \mathcal{N}(0, I_d)} \left\| \xi \right\|^2 - d \right|^p$   
1064 and  $\mathbb{E}_{\xi \sim \mathcal{N}(0, I_d)} \left| (x - m)^\top \Sigma_t^{-1/2} \xi \right|^p$ . Due to Lemma D.3, we have

$$\left( \mathbb{E} \left\| \xi \right\|^2 - d \right)^{1/p} \leq 10p\sqrt{d} \quad \text{for all } p \geq 1. \tag{51}$$

1065 An upper bound on  $\mathbb{E}_{\xi \sim \mathcal{N}(0, I_d)} \left| (x - m)^\top \Sigma_t^{-1/2} \xi \right|^p$  follows from the properties of sub-Gaussian  
1066 random variables. Note that  $(x - m)^\top \Sigma_t^{-1/2} \xi \sim \mathcal{N}(0, \left\| \Sigma_t^{-1/2} (x - m) \right\|^2)$ . Then it holds that

$$\mathbb{E}_{\xi \sim \mathcal{N}(0, I_d)} \left| (x - m)^\top \Sigma_t^{-1/2} \xi \right|^p = \left\| \Sigma_t^{-1/2} (x - m) \right\|^p \mathbb{E}_{\mathfrak{z} \sim \mathcal{N}(0, 1)} |\mathfrak{z}|^p.$$

1067 It is known that

$$\mathbb{P}_{\mathfrak{z} \sim \mathcal{N}(0, 1)} (|\mathfrak{z}| \geq u) \leq 2e^{-u^2/2} \quad \text{for all } u > 0.$$

1068 Then, according to [Vershynin, 2018, Proposition 2.5.2]<sup>3</sup>,

$$\left( \mathbb{E}_{\mathfrak{z} \sim \mathcal{N}(0, 1)} |\mathfrak{z}|^p \right)^{1/p} \leq 2\sqrt{p}. \tag{52}$$

1069 The bounds (50), (51), and (52) yield that

$$\begin{aligned}
\left| \frac{\partial \mathcal{T}_t(g(x) e^{f(x)})}{\partial t} \right| & \leq \left( 2b e^{-bt} \left\| \Sigma_t^{-1/2} (x - m) \right\| \sqrt{p} + \frac{10b p e^{-2bt} \sqrt{d}}{1 - e^{-2bt}} \right) \\
& \cdot \left( \mathcal{T}_t g^2(x) e^{2f(x)} \right)^{\frac{1}{p}} \left( \mathcal{T}_t g(x) e^{f(x)} \right)^{1 - \frac{2}{p}}. \tag{53}
\end{aligned}$$

1070 **Step 4: upper bound on  $\mathcal{T}_t g^2(x) e^{2f(x)}$ .** Our next goal is to show that  $\mathcal{T}_t g^2(x) e^{2f(x)} \leq G(x)$   
1071 uniformly over  $t > 0$ , where  $G(x)$  is defined in (19). Using the condition (18), we observe that

$$\begin{aligned}
\mathcal{T}_t g^2(x) e^{2f(x)} & \leq e^{2M} \mathcal{T}_t g^2(x) \\
& = \frac{e^{2M}}{(2\pi)^{d/2} \sqrt{\det(\Sigma_t)}} \int_{\mathbb{R}^d} g^2(y) \exp \left\{ -\frac{1}{2} \left\| \Sigma_t^{-1/2} (y - m_t(x)) \right\|^2 \right\} dy \\
& \leq \frac{e^{2M}}{(2\pi)^{d/2} \sqrt{\det(\Sigma_t)}} \int_{\mathbb{R}^d} \left( A \left\| \Sigma_t^{-1/2} (y - m) \right\|^\alpha + B \right)^2 \exp \left\{ -\frac{1}{2} \left\| \Sigma_t^{-1/2} (y - m_t(x)) \right\|^2 \right\} dy \\
& = e^{2M} \mathbb{E}_{\eta \sim \mathcal{N}(m_t(x), \Sigma_t)} \left( A \left\| \Sigma_t^{-1/2} (\eta - m) \right\|^\alpha + B \right)^2.
\end{aligned}$$

<sup>3</sup>In the proof of the implication 1  $\Rightarrow$  2 of Proposition 2.5.2, Vershynin shows that  $K_2 = 2K_1$  (see p. 24).



1072 Taking into account the relations

$$m_t(x) - m = e^{-bt}(x - m) \quad \text{and} \quad \Sigma_t = \frac{1 - e^{-2bt}}{2b}\Sigma,$$

1073 we obtain that

$$\begin{aligned} \mathcal{T}_t g^2(x) e^{2f(x)} &\leq e^{2M} \mathbb{E}_{\eta \sim \mathcal{N}(m_t(x), \Sigma_t)} \left( A \left\| \Sigma^{-1/2}(\eta - m) \right\|^\alpha + B \right)^2 \\ &= e^{2M} \mathbb{E}_{\xi \sim \mathcal{N}(0, I_d)} \left( A \left\| \Sigma^{-1/2}(m_t(x) - m) + \Sigma^{-1/2} \Sigma_t^{1/2} \xi \right\|^\alpha + B \right)^2 \\ &= e^{2M} \mathbb{E}_{\xi \sim \mathcal{N}(0, I_d)} \left( A \left\| e^{-bt} \Sigma^{-1/2}(x - m) + \sqrt{\frac{1 - e^{-2bt}}{2b}} \xi \right\|^\alpha + B \right)^2. \end{aligned}$$

1074 Due to the triangle inequality, it holds that

$$\begin{aligned} \sqrt{\mathcal{T}_t g^2(x) e^{2f(x)}} &\leq e^M \sqrt{\mathbb{E}_{\xi \sim \mathcal{N}(0, I_d)} \left( A \left\| e^{-bt} \Sigma^{-1/2}(x - m) + \sqrt{\frac{1 - e^{-2bt}}{2b}} \xi \right\|^\alpha + B \right)^2} \\ &\leq B e^M + A e^M \sqrt{\mathbb{E}_{\xi \sim \mathcal{N}(0, I_d)} \left\| e^{-bt} \Sigma^{-1/2}(x - m) + \sqrt{\frac{1 - e^{-2bt}}{2b}} \xi \right\|^{2\alpha}}. \end{aligned}$$

1075 The inequality  $(u + v)^\alpha \leq 2^{\alpha-1} u^\alpha + 2^{\alpha-1} v^\alpha$  holding for all non-negative  $u$  and  $v$  ensures that

$$\begin{aligned} &\sqrt{\mathbb{E}_{\xi \sim \mathcal{N}(0, I_d)} \left\| e^{-bt} \Sigma^{-1/2}(x - m) + \sqrt{\frac{1 - e^{-2bt}}{2b}} \xi \right\|^{2\alpha}} \\ &= \left( \left[ \mathbb{E}_{\xi \sim \mathcal{N}(0, I_d)} \left\| e^{-bt} \Sigma^{-1/2}(x - m) + \sqrt{\frac{1 - e^{-2bt}}{2b}} \xi \right\|^{2\alpha} \right]^{\frac{1}{2\alpha}} \right)^\alpha \\ &\leq \left( e^{-bt} \left\| \Sigma^{-1/2}(x - m) \right\| + \sqrt{\frac{1 - e^{-2bt}}{2b}} \left[ \mathbb{E}_{\xi \sim \mathcal{N}(0, I_d)} \|\xi\|^{2\alpha} \right]^{\frac{1}{2\alpha}} \right)^\alpha \\ &\leq 2^{\alpha-1} e^{-\alpha bt} \left\| \Sigma^{-1/2}(x - m) \right\|^\alpha + 2^{\alpha-1} \left( \frac{1 - e^{-2bt}}{2b} \right)^{\alpha/2} \sqrt{\mathbb{E}_{\xi \sim \mathcal{N}(0, I_d)} \|\xi\|^{2\alpha}}. \end{aligned}$$

1076 Hence, we showed that

$$\begin{aligned} \sqrt{\mathcal{T}_t g^2(x) e^{2f(x)}} &\leq B e^M + 2^{\alpha-1} A e^{M-\alpha bt} \left\| \Sigma^{-1/2}(x - m) \right\|^\alpha \\ &\quad + 2^{\alpha-1} A e^M \left( \frac{1 - e^{-2bt}}{2b} \right)^{\alpha/2} \sqrt{\mathbb{E}_{\xi \sim \mathcal{N}(0, I_d)} \|\xi\|^{2\alpha}} \\ &\leq B e^M + 2^{\alpha-1} A e^M \left( \left\| \Sigma^{-1/2}(x - m) \right\|^\alpha + (2b)^{-\alpha/2} \sqrt{\mathbb{E}_{\xi \sim \mathcal{N}(0, I_d)} \|\xi\|^{2\alpha}} \right). \end{aligned}$$

1077 Finally, applying the inequality  $(u + v)^\alpha \leq 2^{\alpha-1} u^\alpha + 2^{\alpha-1} v^\alpha$  once again and using Lemma D.3,  
1078 we obtain that

$$\begin{aligned} \mathbb{E}_{\xi \sim \mathcal{N}(0, I_d)} \|\xi\|^{2\alpha} &\leq \mathbb{E}_{\xi \sim \mathcal{N}(0, I_d)} (|\|\xi\|^2 - d| + d)^\alpha \\ &\leq 2^{\alpha-1} \mathbb{E}_{\xi \sim \mathcal{N}(0, I_d)} |\|\xi\|^2 - d|^\alpha + 2^{\alpha-1} d^\alpha \\ &\leq 2^{\alpha-1} (10\alpha\sqrt{d})^\alpha + 2^{\alpha-1} d^\alpha. \end{aligned}$$

1079 This yields the bound

$$\begin{aligned} \sqrt{\mathcal{T}_t g^2(x) e^{2f(x)}} &\leq B e^M + 2^{\alpha-1} A e^M \left\| \Sigma^{-1/2}(x - m) \right\|^\alpha \\ &\quad + 4^{\alpha-1} A e^M (2b)^{-\alpha/2} \left( (10\alpha\sqrt{d})^\alpha + d^\alpha \right) \\ &= G(x), \end{aligned} \tag{54}$$

1080 which holds uniformly over  $t > 0$ .

1081 **Step 5: choice of  $p$ .** The bounds (53), (54) and the equality  $\Sigma_t = (1 - e^{-2bt})\Sigma/(2b)$  imply that

$$\begin{aligned} \left| \frac{\partial \mathcal{T}_t(g(x)e^{f(x)})/\partial t}{\mathcal{T}_t(g(x)e^{f(x)})} \right| &\leq \left( 2be^{-bt} \left\| \Sigma_t^{-1/2}(x-m) \right\| \sqrt{p} + \frac{10bpe^{-2bt}\sqrt{d}}{1-e^{-2bt}} \right) \\ &\quad \cdot \left( \mathcal{T}_t g^2(x)e^{2f(x)} \right)^{\frac{1}{p}} \left( \mathcal{T}_t g(x)e^{f(x)} \right)^{1-\frac{2}{p}} \\ &\leq \left( \frac{(2b)^{3/2}e^{-bt}\sqrt{p}}{\sqrt{1-e^{-2bt}}} \left\| \Sigma^{-1/2}(x-m) \right\| + \frac{10bpe^{-2bt}\sqrt{d}}{1-e^{-2bt}} \right) \left( \frac{G(x)}{\mathcal{T}_t g(x)e^{f(x)}} \right)^{\frac{2}{p}} \end{aligned}$$

1082 In the last line we used  $\Sigma_t = (1 - e^{-2bt})\Sigma/(2b)$ . Applying Young's inequality

$$(2b)^{3/2}\sqrt{p} \left\| \Sigma^{-1/2}(x-m) \right\| \leq \frac{1}{2} \left( \frac{2b^2 \left\| \Sigma^{-1/2}(x-m) \right\|^2}{\sqrt{d}} + 4bp\sqrt{d} \right),$$

1083 we obtain that

$$\begin{aligned} \left| \frac{\partial \mathcal{T}_t(g(x)e^{f(x)})/\partial t}{\mathcal{T}_t(g(x)e^{f(x)})} \right| &\leq \frac{b^2 e^{-bt}}{\sqrt{1-e^{-2bt}} \cdot \sqrt{d}} \left\| \Sigma^{-1/2}(x-m) \right\|^2 \left( \frac{G(x)}{\mathcal{T}_t g(x)e^{f(x)}} \right)^{\frac{2}{p}} \\ &\quad + 2bp\sqrt{d} \left( \frac{e^{-bt}}{\sqrt{1-e^{-2bt}}} + \frac{5e^{-2bt}}{1-e^{-2bt}} \right) \left( \frac{G(x)}{\mathcal{T}_t g(x)e^{f(x)}} \right)^{\frac{2}{p}}. \end{aligned}$$

1084 Let us choose  $p = 2 \vee \log(G(x)/\mathcal{T}_t(g(x)e^{f(x)}))$ . Then it is easy to observe that

$$\left( \frac{G(x)}{\mathcal{T}_t g(x)e^{f(x)}} \right)^{\frac{2}{p}} \leq e^2,$$

1085 and, therefore,

$$\begin{aligned} \left| \frac{\partial \mathcal{T}_t(g(x)e^{f(x)})/\partial t}{\mathcal{T}_t(g(x)e^{f(x)})} \right| &\leq \frac{b^2 e^{2-bt}}{\sqrt{1-e^{-2bt}} \cdot \sqrt{d}} \left\| \Sigma^{-1/2}(x-m) \right\|^2 \\ &\quad + 2be^2\sqrt{d} \left( \frac{e^{-bt}}{\sqrt{1-e^{-2bt}}} + \frac{5e^{-2bt}}{1-e^{-2bt}} \right) \left( 2 \vee \log \frac{G(x)}{\mathcal{T}_t g(x)e^{f(x)}} \right). \end{aligned}$$

1086 We would like to recall that (see (54))

$$\sqrt{\mathcal{T}_t g^2(x)e^{2f(x)}} \leq G(x).$$

1087 This means that

$$\log \frac{G(x)}{\mathcal{T}_t g(x)e^{f(x)}} \geq \log \frac{G(x)}{\sqrt{\mathcal{T}_t g^2(x)e^{2f(x)}}} \geq 0, \quad (55)$$

1088 and, as a consequence, we have

$$2 \vee \log \frac{G(x)}{\mathcal{T}_t g(x)e^{f(x)}} \leq 2 + \log \frac{G(x)}{\mathcal{T}_t g(x)e^{f(x)}}.$$

1089 Thus, we obtain that

$$\begin{aligned} \left| \frac{\partial \mathcal{T}_t(g(x)e^{f(x)})/\partial t}{\mathcal{T}_t(g(x)e^{f(x)})} \right| &\leq \frac{b^2 e^{2-bt}}{\sqrt{1-e^{-2bt}} \cdot \sqrt{d}} \left\| \Sigma^{-1/2}(x-m) \right\|^2 \\ &\quad + 2be^2\sqrt{d} \left( \frac{e^{-bt}}{\sqrt{1-e^{-2bt}}} + \frac{5e^{-2bt}}{1-e^{-2bt}} \right) \left( 2 + \log \frac{G(x)}{\mathcal{T}_t g(x)e^{f(x)}} \right). \quad (56) \end{aligned}$$

1090 **Step 6: properties of ODEs.** Let us note that, due to (56), we have

$$\begin{aligned} \left| \frac{\partial}{\partial t} \log \frac{G(x)}{\mathcal{T}_t g(x) e^{f(x)}} \right| &= \left| \frac{\partial \mathcal{T}_t (g(x) e^{f(x)}) / \partial t}{\mathcal{T}_t (g(x) e^{f(x)})} \right| \\ &\leq \frac{b^2 e^{2-bt}}{\sqrt{1-e^{-2bt}} \cdot \sqrt{d}} \left\| \Sigma^{-1/2} (x-m) \right\|^2 \\ &\quad + 2be^2 \sqrt{d} \left( \frac{e^{-bt}}{\sqrt{1-e^{-2bt}}} + \frac{5e^{-2bt}}{1-e^{-2bt}} \right) \left( 2 + \log \frac{G(x)}{\mathcal{T}_t g(x) e^{f(x)}} \right). \end{aligned} \quad (57)$$

1091 In other words the partial derivative of  $\log(G(x)/\mathcal{T}_t g(x) e^{f(x)})$  is bounded by its value. On this step,  
1092 we use properties of ordinary differential equations to convert the inequality (57) into an upper bound  
1093 on the absolute value of

$$\log \frac{G(x)}{\mathcal{T}_t g(x) e^{f(x)}} - \log \frac{G(x)}{\mathcal{T}_\infty g(x) e^{f(x)}}.$$

1094 For this purpose, let us fix an arbitrary  $x \in \mathbb{R}^d$  and apply Lemma D.1 with

$$a(t) = \frac{b^2 e^{2-bt}}{\sqrt{1-e^{-2bt}} \cdot \sqrt{d}} \left\| \Sigma^{-1/2} (x-m) \right\|^2 + 4be^2 \sqrt{d} \left( \frac{e^{-bt}}{\sqrt{1-e^{-2bt}}} + \frac{5e^{-2bt}}{1-e^{-2bt}} \right)$$

1095 and

$$\varkappa(t) = 2be^2 \sqrt{d} \left( \frac{e^{-bt}}{\sqrt{1-e^{-2bt}}} + \frac{5e^{-2bt}}{1-e^{-2bt}} \right).$$

1096 Note that the function

$$\log \frac{G(x)}{\mathcal{T}_t g(x) e^{f(x)}}$$

1097 is always non-negative due to (55). Since

$$\int_t^{+\infty} \frac{be^{-bs} ds}{\sqrt{1-e^{-2bs}}} = \arcsin(e^{-bt}) \quad \text{and} \quad \int_t^{+\infty} \frac{2be^{-2bs} ds}{1-e^{-2bs}} = -\log(1-e^{-2bt}),$$

1098 it holds that

$$\int_t^{+\infty} \varkappa(\tau) d\tau = 2e^2 \sqrt{d} \arcsin(e^{-bt}) - 5e^2 \sqrt{d} \log(1-e^{-2bt}) = \log \mathcal{K}(t)$$

1099 and

$$\begin{aligned} \int_t^{+\infty} a(s) ds &= \left( \frac{be^2}{\sqrt{d}} \left\| \Sigma^{-1/2} (x-m) \right\|^2 + 4e^2 \sqrt{d} \right) \arcsin(e^{-bt}) \\ &\quad - 10e^2 \sqrt{d} \log(1-e^{-2bt}) \\ &= \mathcal{A}(x, t), \end{aligned}$$

1100 where the functions  $\mathcal{K}(t)$  and  $\mathcal{A}(x, t)$  are defined in (21) and (20), respectively. Then, according to  
1101 Lemma D.1, it holds that

$$\frac{1}{\mathcal{K}(t)} \left( \log \frac{G(x)}{\mathcal{T}_\infty g(x) e^{f(x)}} - \mathcal{A}(x, t) \right) \leq \log \frac{G(x)}{\mathcal{T}_t g(x) e^{f(x)}} \leq \mathcal{K}(t) \left( \log \frac{G(x)}{\mathcal{T}_\infty g(x) e^{f(x)}} + \mathcal{A}(x, t) \right),$$

1102 and we finally obtain that

$$e^{-\mathcal{A}(x, t) \mathcal{K}(t)} \left( \frac{\mathcal{T}_\infty g(x) e^{f(x)}}{G(x)} \right)^{\mathcal{K}(t)} \leq \frac{\mathcal{T}_t g(x) e^{f(x)}}{G(x)} \leq e^{\mathcal{A}(x, t) \mathcal{K}(t)} \left( \frac{\mathcal{T}_\infty g(x) e^{f(x)}}{G(x)} \right)^{1/\mathcal{K}(t)}.$$

## 1103 C Properties of subquadratic log-densities

1104 In this section, we present some properties of probability densities  $p(x)$  such that  $\log p(x) = \mathcal{O}(\|x\|^2)$ .  
 1105 In view of Assumption 3 and Lemma B.1, such densities naturally arise in the proof of Theorem 1.  
 1106 We start with the following preliminary bound, which helps us to show that the class of log-potentials  
 1107  $\Psi$  satisfies a Bernstein-type condition. This is one of key moments in the proof of our main result,  
 1108 allowing us to derive rates of convergence possibly faster than  $\mathcal{O}(n^{-1/2})$ .

1109 **Lemma C.1.** *For any two probability densities  $p$  and  $q$  on  $\mathbb{R}^d$  such that*

$$\int_{\mathbb{R}^d} \log^2 \left( \frac{q(x)}{p(x)} \right) p(x) dx < +\infty$$

1110 *and any  $\omega \in (0, 1)$ , it holds that*

$$\begin{aligned} \int_{\mathbb{R}^d} \log^2 \left( \frac{p(x)}{q(x)} \right) p(x) dx &\leq 2 \log(1/\omega) \text{KL}(p, q) \\ &+ 2 \int_{\mathbb{R}^d} \log^2 \left( \frac{(1-\omega)q(x) + \omega p(x)}{q(x)} \right) p(x) dx. \end{aligned} \quad (58)$$

1111 The proof of Lemma C.1 is postponed to Appendix C.1. The next lemma ensures that, under  
 1112 Assumption 2, the second term in the right-hand side of (58) grows polynomially with  $\omega$ .

1113 **Lemma C.2.** *Let  $p$  and  $q$  be arbitrary probability densities on  $\mathbb{R}^d$ . Assume that  $p$  is a probability  
 1114 density of a centered sub-Gaussian distribution on  $\mathbb{R}^d$  with a variance proxy  $v^2$ , that is,*

$$\mathbb{E}_{\xi \sim p} e^{u^\top \xi} \leq e^{v^2 \|u\|^2/2} \quad \text{for all } u \in \mathbb{R}^d.$$

1115 *Let  $p \ll q$  and suppose that there are constants  $A \geq 0$  and  $B \in \mathbb{R}$  such that*

$$\log \frac{p(x)}{q(x)} \leq A\|x\|^2 + B \quad \text{for all } x \text{ from the support of } p(x).$$

1116 *Then, for any  $\omega \in (0, 1/2]$ , it holds that*

$$\begin{aligned} \int_{\mathbb{R}^d} \log^2 \left( \frac{(1-\omega)q(x) + \omega p(x)}{q(x)} \right) p(x) dx \\ \leq 4\omega^2 + e^B \omega + 6^d (0.5 \log(1/\omega) - 0.5B + 16A\sigma^2) e^{B/(16Av^2)} \omega^{1/(16Av^2)}. \end{aligned}$$

1117 The proof of Lemma C.2 is moved to Appendix C.2. Lemma C.1 and Lemma C.2 imply that, if one  
 1118 takes  $\omega = n^{-16Av^2} \wedge n^{-1}$ , then

$$\int_{\mathbb{R}^d} \log^2 \left( \frac{p(x)}{q(x)} \right) p(x) dx \lesssim \log(n) \text{KL}(p, q) + \mathcal{O}(1/n).$$

1119 In other words, under the conditions of these lemmata, the variance of  $\log(p(\xi)/q(\xi))$ , where  $\xi \sim p$ ,  
 1120 is controlled by its expectation. Finally, we would like to present a result on an upper bound on the  $\psi_1$ -  
 1121 norm of  $\log(p(\xi)/q(\xi))$ ,  $\xi \sim p$ . An upper bound on the Orlicz norm is necessary for understanding  
 1122 behaviour of distribution tails.

1123 **Lemma C.3.** *Let  $p$  be a sub-Gaussian probability density on  $\mathbb{R}^d$  with variance proxy  $v^2$ , that is,*

$$\mathbb{E}_{\xi \sim p} e^{u^\top \xi} \leq e^{v^2 \|u\|^2/2} \quad \text{for all } u \in \mathbb{R}^d.$$

1124 *Let  $q$  be an arbitrary probability density such that*

$$\log \frac{p(x)}{q(x)} \leq A\|x\|^2 + B \quad \text{for all } x \in \text{supp}(p),$$

1125 *where  $A$  and  $B$  are some non-negative constants. Let  $\xi \sim p$ . Then it holds that*

$$\left\| \log \frac{p(\xi)}{q(\xi)} \right\|_{\psi_1} \leq 1 \vee (2B + 2(d+2)Av^2).$$

1126 The proof of Lemma C.3 is deferred to Appendix C.3.

1127 **C.1 Proof of Lemma C.1**

1128 According to the Newton-Leibniz formula, for any  $u < 1$  we have

$$\log^2(1-u) = \left( \int_0^1 \frac{u \, ds}{1-su} \right)^2.$$

1129 Using Young's inequality, we obtain that

$$\begin{aligned} \log^2(1-u) &\leq 2 \left( \int_0^{1-\omega} \frac{u \, ds}{1-su} \right)^2 + 2 \left( \int_{1-\omega}^1 \frac{u \, ds}{1-su} \right)^2 \\ &= 2 \left( \int_0^{1-\omega} \frac{u \, ds}{1-su} \right)^2 + 2 (\log(1-u) - \log(1-(1-\omega)u))^2 \\ &= 2 \left( \int_0^{1-\omega} \frac{u \, ds}{1-su} \right)^2 + 2 \log^2 \left( 1 + \frac{\omega u}{1-u} \right). \end{aligned} \quad (59)$$

1130 The first term in the right-hand side does not exceed

$$\begin{aligned} 2 \left( \int_0^{1-\omega} \frac{1}{\sqrt{1-s}} \cdot \frac{u\sqrt{1-s}}{1-su} \, ds \right)^2 &\leq 2 \int_0^{1-\omega} \frac{ds}{1-s} \int_0^{1-\omega} \frac{u^2(1-s) \, ds}{(1-su)^2} \\ &= 2 \log(1/\omega) \int_0^{1-\omega} \frac{u^2(1-s) \, ds}{(1-su)^2} \\ &\leq 2 \log(1/\omega) \int_0^1 \frac{u^2(1-s) \, ds}{(1-su)^2}. \end{aligned} \quad (60)$$

1131 On the other hand, due to Taylor's expansion with an integral remainder term, it holds that

$$\log(1-u) = -u - \int_0^1 \frac{u^2(1-s) \, ds}{(1-su)^2}.$$

1132 In other words, the right-hand side in (60) is equal to

$$2 \log(1/\omega) (-u - \log(1-u)).$$

1133 This, together with (59), yields that

$$\log^2(1-u) \leq 2 \log(1/\omega) (-u - \log(1-u)) + 2 \log^2 \left( 1 + \frac{\omega u}{1-u} \right).$$

1134 Substituting  $u$  in the expression above with  $(p(x) - q(x))/p(x)$ , we observe that

$$\log^2 \left( \frac{q(x)}{p(x)} \right) \leq 2 \log(1/\omega) \left( \frac{q(x) - p(x)}{p(x)} - \log \frac{q(x)}{p(x)} \right) + 2 \log^2 \left( \frac{(1-\omega)q(x) + \omega p(x)}{q(x)} \right) \quad (61)$$

1135 for all  $x$  such that  $p(x) > 0$ . Let us note that the condition

$$\int_{\mathbb{R}^d} \log^2 \left( \frac{q(x)}{p(x)} \right) p(x) \, dx < +\infty$$

1136 implies that  $p \ll q$ . This means that  $q(x) > 0$  whenever  $x$  belongs to the support of  $p(x)$ . Integrating  
1137 (61), we finally obtain that

$$\int_{\mathbb{R}^d} \log^2 \left( \frac{p(x)}{q(x)} \right) p(x) \, dx \leq 2 \log(1/\omega) \text{KL}(p, q) + 2 \int_{\mathbb{R}^d} \log^2 \left( \frac{(1-\omega)q(x) + \omega p(x)}{q(x)} \right) p(x) \, dx.$$

1138 □

1139 **C.2 Proof of Lemma C.2**

1140 Due to the conditions of the lemma, for any  $x$  belonging to the support of  $\mathbf{p}$ , it holds that

$$\begin{aligned} \log(1 - \omega) &\leq \log \left( \frac{(1 - \omega)\mathbf{q}(x) + \omega\mathbf{p}(x)}{\mathbf{q}(x)} \right) \\ &\leq \log \left( 1 + \omega e^{\log(\mathbf{p}(x)/\mathbf{q}(x))} \right) \\ &\leq \log \left( 1 + \omega e^{A\|x\|^2 + B} \right). \end{aligned}$$

1141 Note that the expression in the left-hand side is at least  $-2\omega$ , since  $\omega \in (0, 1/2]$ . This yields that

$$\begin{aligned} \int_{\mathbb{R}^d} \log^2 \left( \frac{(1 - \omega)\mathbf{q}(x) + \omega\mathbf{p}(x)}{\mathbf{q}(x)} \right) \mathbf{p}(x) \, dx &\leq \int_{\mathbb{R}^d} \max \left\{ 4\omega^2, \log^2 \left( 1 + \omega e^{A\|x\|^2 + B} \right) \right\} \mathbf{p}(x) \, dx \\ &\leq \int_{\mathbb{R}^d} \left( 4\omega^2 + \log^2 \left( 1 + \omega e^{A\|x\|^2 + B} \right) \right) \mathbf{p}(x) \, dx \\ &= 4\omega^2 + \int_{\mathbb{R}^d} \log^2 \left( 1 + \omega e^{A\|x\|^2 + B} \right) \mathbf{p}(x) \, dx. \end{aligned}$$

1142 Let us elaborate on the second term in the right-hand side. Let us introduce  $\varepsilon = e^B \omega$  and split the  
1143 integral into two parts:

$$\begin{aligned} \int_{\mathbb{R}^d} \log^2 \left( 1 + \omega e^{A\|x\|^2 + B} \right) \mathbf{p}(x) \, dx &= \int_{\mathbb{R}^d} \log^2 \left( 1 + \varepsilon e^{A\|x\|^2} \right) \mathbf{p}(x) \, dx \\ &= \int_{2A\|x\|^2 \leq \log(1/\varepsilon)} \log^2 \left( 1 + \varepsilon e^{A\|x\|^2} \right) \mathbf{p}(x) \, dx + \int_{2A\|x\|^2 > \log(1/\varepsilon)} \log^2 \left( 1 + \varepsilon e^{A\|x\|^2} \right) \mathbf{p}(x) \, dx. \end{aligned}$$

1144 On the set  $\{x \in \mathbb{R}^d : 2A\|x\|^2 \leq \log(1/\varepsilon)\}$  we have  $\varepsilon e^{A\|x\|^2} \leq \varepsilon^{1/2}$ . This yields that

$$\int_{2A\|x\|^2 \leq \log(1/\varepsilon)} \log^2 \left( 1 + \varepsilon e^{A\|x\|^2} \right) \mathbf{p}(x) \, dx \leq \int_{2A\|x\|^2 \leq \log(1/\varepsilon)} \log^2 \left( 1 + \sqrt{\varepsilon} \right) \mathbf{p}(x) \, dx \leq \varepsilon.$$

1145 It remains to bound

$$\int_{2A\|x\|^2 > \log(1/\varepsilon)} \log^2 \left( 1 + \varepsilon e^{A\|x\|^2} \right) \mathbf{p}(x) \, dx.$$

1146 We use properties of sub-Gaussian distributions for this purpose. We start with the observation

$$\begin{aligned} \int_{2A\|x\|^2 > \log(1/\varepsilon)} \log^2 \left( 1 + \varepsilon e^{A\|x\|^2} \right) \mathbf{p}(x) \, dx &\leq \int_{2A\|x\|^2 > \log(1/\varepsilon)} \log^2 \left( 1 + e^{A\|x\|^2} \right) \mathbf{p}(x) \, dx \\ &\leq A \int_{2A\|x\|^2 > \log(1/\varepsilon)} \|x\|^2 \mathbf{p}(x) \, dx. \end{aligned}$$

1147 Let us introduce a random vector  $\xi \sim \mathbf{p}$ . Then it is straightforward to observe that the integral

$$A \int_{2A\|x\|^2 > \log(1/\varepsilon)} \|x\|^2 \mathbf{p}(x) \, dx$$

1148 is nothing but the expectation of the non-negative random variable  $A\|\xi\|^2 \mathbb{1}[2A\|\xi\|^2 > \log(1/\varepsilon)]$ .  
 1149 Then it holds that

$$\begin{aligned} A \mathbb{E} \|\xi\|^2 \mathbb{1}(2A\|\xi\|^2 > \log(1/\varepsilon)) &= \frac{1}{2} \int_0^{+\infty} \mathbb{P}(2A\|\xi\|^2 \mathbb{1}[2A\|\xi\|^2 > \log(1/\varepsilon)] \geq u) du \\ &= \frac{1}{2} \int_0^{\log(1/\varepsilon)} \mathbb{P}(2A\|\xi\|^2 > \log(1/\varepsilon)) du + \frac{1}{2} \int_{\log(1/\varepsilon)}^{+\infty} \mathbb{P}(2A\|\xi\|^2 \geq u) du \\ &= 0.5 \log(1/\varepsilon) \mathbb{P}(2A\|\xi\|^2 > \log(1/\varepsilon)) + \frac{1}{2} \int_{\log(1/\varepsilon)}^{+\infty} \mathbb{P}(2A\|\xi\|^2 \geq u) du. \end{aligned}$$

1150 Standard results on large deviation inequalities for the Euclidean norm of a sub-Gaussian random  
 1151 vector (see, for instance, the proof of Theorem 1.19 from Rigollet and Hütter [2023]) imply that

$$\mathbb{P}(A\|\xi\|^2 \geq u) = \mathbb{P}\left(\|\xi\| \geq \sqrt{\frac{u}{2A}}\right) \leq 6^d \exp\left\{-\frac{u}{16A\sigma^2}\right\} \quad \text{for any } u > 0.$$

1152 This yields that

$$\begin{aligned} A \mathbb{E} \|\xi\|^2 \mathbb{1}(2A\|\xi\|^2 > \log(1/\varepsilon)) &= 0.5 \log(1/\varepsilon) \mathbb{P}(2A\|\xi\|^2 > \log(1/\varepsilon)) + \frac{1}{2} \int_{\log(1/\varepsilon)}^{+\infty} \mathbb{P}(2A\|\xi\|^2 \geq u) du \\ &\leq 0.5 \log(1/\varepsilon) \cdot 6^d \varepsilon^{1/(16A\sigma^2)} + \frac{6^d}{2} \int_{\log(1/\varepsilon)}^{+\infty} \exp\left\{-\frac{u}{16A\sigma^2}\right\} du \\ &= 0.5 \log(1/\varepsilon) \cdot 6^d \varepsilon^{1/(16A\sigma^2)} + 8 \cdot 6^d A\sigma^2 \varepsilon^{1/(16A\sigma^2)}. \end{aligned}$$

1153 Hence, we obtain that

$$\begin{aligned} &\int_{\mathbb{R}^d} \log^2 \left( \frac{(1-\omega)\mathbf{q}(x) + \omega\mathbf{p}(x)}{\mathbf{q}(x)} \right) \mathbf{p}(x) dx \\ &\leq 4\omega^2 + \varepsilon + 6^d (0.5 \log(1/\varepsilon) + 16A\sigma^2) \varepsilon^{1/(16A\sigma^2)} \\ &= 4\omega^2 + e^B \omega + 6^d (0.5 \log(1/\omega) - 0.5B + 16A\sigma^2) e^{B/(16A\sigma^2)} \omega^{1/(16A\sigma^2)}. \end{aligned}$$

1154 □

### 1155 C.3 Proof of Lemma C.3

1156 Let us introduce  $u = 1 \vee (B + (d+2)A\mathbf{v}^2)$  and note that

$$\begin{aligned} \mathbb{E}_{\xi \sim \mathbf{p}} \exp \left\{ \frac{1}{2u} \left| \log \frac{\mathbf{p}(\xi)}{\mathbf{q}(\xi)} \right| \right\} &\leq \left( \mathbb{E}_{\xi \sim \mathbf{p}} \exp \left\{ \frac{1}{u} \left| \log \frac{\mathbf{p}(\xi)}{\mathbf{q}(\xi)} \right| \right\} \right)^{1/2} \\ &\leq \left( \mathbb{E}_{\xi \sim \mathbf{p}} \exp \left\{ \frac{1}{u} \log \frac{\mathbf{q}(\xi)}{\mathbf{p}(\xi)} \right\} + \mathbb{E}_{\xi \sim \mathbf{p}} \exp \left\{ \frac{1}{u} \log \frac{\mathbf{p}(\xi)}{\mathbf{q}(\xi)} \right\} \right)^{1/2} \\ &\leq \left( 1 + \mathbb{E}_{\xi \sim \mathbf{p}} \exp \left\{ \frac{1}{u} \log \frac{\mathbf{p}(\xi)}{\mathbf{q}(\xi)} \right\} \right)^{1/2}. \end{aligned}$$

1157 In the last inequality we used the fact that  $u \geq 1$  and then

$$\mathbb{E}_{\xi \sim \mathbf{p}} \exp \left\{ \frac{1}{u} \log \frac{\mathbf{q}(\xi)}{\mathbf{p}(\xi)} \right\} \leq \mathbb{E}_{\xi \sim \mathbf{p}} \frac{\mathbf{q}(\xi)}{\mathbf{p}(\xi)} = 1.$$

1158 Hence, it is enough to show that

$$\mathbb{E}_{\xi \sim \mathbf{p}} \exp \left\{ \frac{1}{u} \log \frac{\mathbf{p}(\xi)}{\mathbf{q}(\xi)} \right\} \leq 3$$

1159 to finish the proof of the lemma. For this purpose, we use the condition  $\mathbf{p}(x)/\mathbf{q}(x) \leq A\|x\|^2 + B$  for  
1160 all  $x \in \text{supp}(\mathbf{p})$ , which yields that

$$\mathbb{E}_{\xi \sim \mathbf{p}} \exp \left\{ \frac{1}{u} \log \frac{\mathbf{p}(\xi)}{\mathbf{q}(\xi)} \right\} \leq e^{B/u} \mathbb{E}_{\xi \sim \mathbf{p}} e^{A\|\xi\|^2/u}.$$

1161 Let  $\gamma \sim \mathcal{N}(0, I_d)$  be a Gaussian random vector in  $\mathbb{R}^d$  which is independent of  $\xi$ . Then we can  
1162 represent the exponential moment  $\mathbb{E}_{\xi \sim \mathbf{p}} e^{A\|\xi\|^2/u}$  in the following form:

$$\mathbb{E}_{\xi \sim \mathbf{p}} e^{A\|\xi\|^2/u} = \mathbb{E}_{\xi \sim \mathbf{p}} \mathbb{E}_{\gamma \sim \mathcal{N}(0, I_d)} \exp \left\{ \sqrt{\frac{2A}{u}} \xi^\top \gamma \right\}.$$

1163 According to the conditions of the lemma,  $\xi$  is a sub-Gaussian random vector with variance proxy  $\mathbf{v}^2$ .  
1164 This yields that

$$\begin{aligned} \mathbb{E}_{\xi \sim \mathbf{p}} e^{A\|\xi\|^2/u} &= \mathbb{E}_{\xi \sim \mathbf{p}} \mathbb{E}_{\gamma \sim \mathcal{N}(0, I_d)} \exp \left\{ \sqrt{\frac{2A}{u}} \xi^\top \gamma \right\} \\ &\leq \mathbb{E}_{\gamma \sim \mathcal{N}(0, I_d)} e^{A\mathbf{v}^2 \|\gamma\|^2/u} \\ &= \left( 1 - \frac{2A\mathbf{v}^2}{u} \right)^{-d/2}. \end{aligned}$$

1165 Since  $u = B + (d+2)A\mathbf{v}^2 \geq (d+2)A\mathbf{v}^2$ , we obtain that

$$-\frac{d}{2} \log \left( 1 - \frac{2A\mathbf{v}^2}{u} \right) \leq \frac{d}{2} \cdot \frac{2A\mathbf{v}^2/u}{1 - 2/(d+2)} = \frac{(d+2)A\mathbf{v}^2}{u}.$$

1166 Hence, it holds that

$$\mathbb{E}_{\xi \sim \mathbf{p}} \exp \left\{ \frac{1}{u} \log \frac{\mathbf{p}(\xi)}{\mathbf{q}(\xi)} \right\} \leq e^{B/u} \mathbb{E}_{\xi \sim \mathbf{p}} e^{A\|\xi\|^2/u} \leq \exp \left\{ \frac{B + (d+2)A\mathbf{v}^2}{u} \right\}.$$

1167 Due to the definition,  $u$  is not less than  $B + (d+2)A\mathbf{v}^2$ . This yields that the expression in the  
1168 right-hand side not exceed  $e$ . This implies that

$$\mathbb{E}_{\xi \sim \mathbf{p}} \exp \left\{ \frac{1}{2u} \left| \log \frac{\mathbf{p}(\xi)}{\mathbf{q}(\xi)} \right| \right\} \leq \left( 1 + \mathbb{E}_{\xi \sim \mathbf{p}} \exp \left\{ \frac{1}{u} \log \frac{\mathbf{p}(\xi)}{\mathbf{q}(\xi)} \right\} \right)^{1/2} < \sqrt{1+3} = 2.$$

1169 The proof is finished.

1170 □

## 1171 D Auxiliary results

1172 This section contains auxiliary results used in the proofs of Lemma B.2 and Lemma B.3. The first  
1173 one is a Gronwall-type inequality helping us to relate the operators  $\mathcal{T}_t$  and  $\mathcal{T}_\infty$  (see Lemma B.3).

1174 **Lemma D.1.** *Let  $\varphi : (0, +\infty) \rightarrow \mathbb{R}_+$  be a non-negative function such that there exists*

$$\lim_{t \rightarrow +\infty} \varphi(t) = \varphi(+\infty) \in \mathbb{R}.$$

1175 *Let the functions  $a(t)$  and  $\varkappa(t)$  take non-negative values on  $(0, +\infty)$  and assume that the integrals*

$$\int_t^{+\infty} a(s) \, ds \quad \text{and} \quad \int_t^{+\infty} \varkappa(s) \, ds$$



1176 are finite for any  $t > 0$ . If

$$-\frac{d\varphi(t)}{dt} \leq a(t) + \kappa(t)\varphi(t) \quad \text{for all } t > 0,$$

1177 then

$$\varphi(t) \leq \left( \varphi(+\infty) + \int_t^{+\infty} a(s) ds \right) \exp \left\{ \int_t^{+\infty} \kappa(\tau) d\tau \right\} \quad \text{for any } t > 0.$$

1178 Otherwise, if

$$\frac{d\varphi(t)}{dt} \leq a(t) + \kappa(t)\varphi(t) \quad \text{for all } t > 0,$$

1179 then it holds that

$$\varphi(t) \geq \left( \varphi(+\infty) - \int_t^{+\infty} a(s) ds \right) \exp \left\{ - \int_t^{+\infty} \kappa(\tau) d\tau \right\} \quad \text{for any } t > 0.$$

1180 The proof of Lemma D.1 is quite similar to the one of the original Gronwall lemma. Nevertheless,  
1181 we provide all the derivations in Appendix D.1. We move to the next auxiliary result.

1182 **Lemma D.2.** Let  $\rho_{\mu, \Omega}(x)$  stand for the density of  $\mathcal{N}(\mu, \Omega)$  and let

$$\mathbf{q}(y | x) = (2\pi)^{-d/2} \det(\Sigma_T)^{-1/2} \exp \left\{ -\frac{1}{2} \left\| \Sigma_T^{-1/2} (y - m_T(x)) \right\|^2 \right\}.$$

1183 Then for any function  $f : \mathbb{R}^d \rightarrow \mathbb{R}$  it holds that

$$\int_{\mathbb{R}^d} f(x) \mathbf{q}(y | x) \rho_{\mu, \Omega}(x) dx = \varphi(y) \mathbb{E}f(\xi),$$

1184 where  $\xi \sim \mathcal{N}(\check{\mu}, \check{\Omega})$  with

$$\check{\mu} = \mu + e^{-bT} \Omega (\Sigma_T + e^{-2bT} \Omega)^{-1} (y - m_T(\mu)), \quad \check{\Omega} = (\Omega^{-1} + e^{-2bT} \Sigma_T^{-1})^{-1},$$

1185 and  $\varphi(y)$  is the density of  $\mathcal{N}(m_T(\mu), \Sigma_T + e^{-2bT} \Omega)$ :

$$\varphi(y) = (2\pi)^{-d/2} \det(\Sigma_T + e^{-2bT} \Omega)^{-1/2} \exp \left\{ -\frac{1}{2} \left\| (\Sigma_T + e^{-2bT} \Omega)^{-1/2} (y - m_T(\mu)) \right\|^2 \right\}.$$

1186 The proof of Lemma D.2 is deferred to Appendix D.2. We use this lemma in the proof of our  
1187 key technical result, Lemma B.2, which allows us to ensure that, under Assumptions 2 and 3 the  
1188 log-density  $\log \rho_T^\psi(y)$  is continuous with respect to the log-potential  $\psi$ . Finally, we present a sharp  
1189 bound on  $L_p$ -norm of a centered chi-squared random variable.

1190 **Lemma D.3.** Let  $\xi \sim \mathcal{N}(0, I_d)$  be a Gaussian vector in  $\mathbb{R}^d$ . Then, for any  $p \geq 1$ , it holds that

$$\left( \mathbb{E} \left| \|\xi\|^2 - d \right|^p \right)^{1/p} \leq 10p\sqrt{d}.$$

1191 The proof of Lemma D.3 is moved to Appendix D.3. Let us note that, unlike the  $L_p$ -norm of  $\|\xi\|^2$ ,  
1192  $\xi \sim \mathcal{N}(0, I_d)$ , which is of order  $\Omega(d)$ , the  $L_p$ -norm of  $\|\xi\|^2 - d$  is much smaller and grows as fast as  
1193  $\mathcal{O}(\sqrt{d})$ .

## 1194 D.1 Proof of Lemma D.1

1195 We perform the proof in two steps starting with the upper bound.

1196 **Step 1: upper bound.** Let us introduce

$$\Phi(t) = \varphi(t) \exp \left\{ - \int_t^{+\infty} \kappa(s) ds \right\}, \quad t > 0.$$

1197 Then it is easy to observe that for any  $t > 0$  the derivative of  $\psi$  satisfies the inequality

$$\begin{aligned} \frac{d\Phi(t)}{dt} &= \varkappa(t)\varphi(t) \exp \left\{ - \int_t^{+\infty} \varkappa(s) ds \right\} + \frac{d\varphi(t)}{dt} \exp \left\{ - \int_t^{+\infty} \varkappa(s) ds \right\} \\ &\geq -a(t) \exp \left\{ - \int_t^{+\infty} \varkappa(s) ds \right\}. \end{aligned}$$

1198 Applying the Newton-Leibniz formula, we obtain that

$$\Phi(t) - \Phi(+\infty) = - \int_t^{+\infty} \frac{d\Phi(s)}{ds} ds \leq \int_t^{+\infty} a(s) \exp \left\{ - \int_s^{+\infty} \varkappa(\tau) d\tau \right\} ds.$$

1199 This yields that

$$\varphi(t) \exp \left\{ - \int_t^{+\infty} \varkappa(\tau) d\tau \right\} \leq \varphi(+\infty) + \int_t^{+\infty} a(s) \exp \left\{ \int_s^{+\infty} \varkappa(\tau) d\tau \right\} ds.$$

1200 Taking into account that

$$\exp \left\{ \int_t^s \varkappa(\tau) d\tau \right\} \leq \exp \left\{ \int_t^{+\infty} \varkappa(\tau) d\tau \right\} \quad \text{for all } s \geq t,$$

1201 we finally deduce

$$\begin{aligned} \varphi(t) &\leq \varphi(+\infty) \exp \left\{ \int_t^{+\infty} \varkappa(\tau) d\tau \right\} + \int_t^{+\infty} a(s) \exp \left\{ \int_t^s \varkappa(\tau) d\tau \right\} ds \\ &\leq \varphi(+\infty) \exp \left\{ \int_t^{+\infty} \varkappa(\tau) d\tau \right\} + \int_t^{+\infty} a(s) \exp \left\{ \int_t^{+\infty} \varkappa(\tau) d\tau \right\} ds \\ &= \left( \varphi(+\infty) + \int_t^{+\infty} a(s) ds \right) \exp \left\{ \int_t^{+\infty} \varkappa(\tau) d\tau \right\}. \end{aligned}$$

1202 **Step 2: lower bound.** The proof of the lower bound is quite similar. The only difference is that  
1203 we have to replace  $\Phi(t)$  by

$$\chi(t) = \varphi(t) \exp \left\{ \int_t^{+\infty} \varkappa(s) ds \right\}, \quad t > 0.$$

1204 Then the derivative of  $\chi$  obeys the inequality

$$\begin{aligned} \frac{d\chi(t)}{dt} &= -\varkappa(t)\varphi(t) \exp \left\{ \int_t^{+\infty} \varkappa(s) ds \right\} + \frac{d\varphi(t)}{dt} \exp \left\{ \int_t^{+\infty} \varkappa(s) ds \right\} \\ &\leq a(t) \exp \left\{ \int_t^{+\infty} \varkappa(s) ds \right\}. \end{aligned}$$

1205 According to the Newton-Leibniz formula, it holds that

$$\chi(+\infty) - \chi(t) = \int_t^{+\infty} \frac{d\chi(s)}{ds} ds \leq \int_t^{+\infty} a(s) \exp \left\{ \int_s^{+\infty} \varkappa(\tau) d\tau \right\} ds.$$

1206 This implies that

$$\varphi(t) \exp \left\{ \int_t^{+\infty} \kappa(\tau) d\tau \right\} \geq \varphi(+\infty) - \int_t^{+\infty} a(s) \exp \left\{ \int_s^{+\infty} \kappa(\tau) d\tau \right\} ds.$$

1207 Since, for any  $s \geq t$ , it holds that

$$\exp \left\{ \int_t^s \kappa(\tau) d\tau \right\} \leq \exp \left\{ \int_t^{+\infty} \kappa(\tau) d\tau \right\}$$

1208 we obtain the desired bound:

$$\begin{aligned} \varphi(t) &\geq \varphi(+\infty) \exp \left\{ - \int_t^{+\infty} \kappa(\tau) d\tau \right\} - \int_t^{+\infty} a(s) \exp \left\{ - \int_t^s \kappa(\tau) d\tau \right\} ds \\ &\geq \varphi(+\infty) \exp \left\{ - \int_t^{+\infty} \kappa(\tau) d\tau \right\} - \int_t^{+\infty} a(s) \exp \left\{ - \int_t^{+\infty} \kappa(\tau) d\tau \right\} ds \\ &= \left( \varphi(+\infty) - \int_t^{+\infty} a(s) ds \right) \exp \left\{ - \int_t^{+\infty} \kappa(\tau) d\tau \right\}. \end{aligned}$$

1209

□

## 1210 D.2 Proof of Lemma D.2

1211 Let us note that  $q(y | x)$  is the conditional density of  $X_T^0$  given  $X_0^0 = x$ , where  $X_t^0$  is the Ornstein-  
1212 Uhlenbeck process

$$dX_t^0 = b(m - X_t)dt + \Sigma^{1/2}dW_t, \quad X_0^0 \sim \rho_{\mu, \Omega}.$$

1213 Due to the properties of the Ornstein-Uhlenbeck process,  $X_T - e^{-bT}X_0$  is independent of  $X_0$  and

$$X_T - e^{-bT}X_0 \sim \mathcal{N}((1 - e^{-bT})m, \Sigma_T).$$

1214 Since  $X_0 \sim \mathcal{N}(\mu, \Omega)$  by the condition of the lemma,  $X_0$  and  $X_T - e^{-bT}X_0$  have a joint distribution

$$\begin{pmatrix} X_0 \\ X_T - e^{-bT}X_0 \end{pmatrix} \sim \mathcal{N} \left( \begin{pmatrix} \mu \\ (1 - e^{-bT})m \end{pmatrix}, \begin{pmatrix} \Omega & O_d \\ O_d & \Sigma_T \end{pmatrix} \right),$$

1215 where  $O_d$  is a matrix of size  $d \times d$  with zero entries. This yields that

$$\begin{pmatrix} X_0 \\ X_T \end{pmatrix} = \begin{pmatrix} I_d & O_d \\ e^{-bT}I_d & I_d \end{pmatrix} \begin{pmatrix} X_0 \\ X_T - e^{-bT}X_0 \end{pmatrix} \sim \mathcal{N} \left( \begin{pmatrix} \mu \\ m_T(\mu) \end{pmatrix}, \begin{pmatrix} \Omega & e^{-bT}\Omega \\ e^{-bT}\Omega & \Sigma_T + e^{-2bT}\Omega \end{pmatrix} \right).$$

1216 Then the integral

$$\int_{\mathbb{R}^d} f(x) \frac{q(y | x) \rho_{\mu, \Omega}(x)}{\varphi(y)} dx$$

1217 is nothing but the conditional expectation of  $f(X_0)$  given  $X_T = y$ . It is known that the conditional  
1218 distribution of  $X_0$  given  $X_T = y$  is Gaussian with mean  $\check{\mu}$  and covariance  $\check{\Omega}$

$$\check{\mu} = \mu + e^{-bT}\Omega(\Sigma_T + e^{-2bT}\Omega)^{-1}(y - m_T(\mu)), \quad \check{\Omega} = (\Omega^{-1} + e^{-2bT}\Sigma_T^{-1})^{-1},$$

1219 Hence, we obtain that

$$\int_{\mathbb{R}^d} f(x) \frac{q(y | x) \rho_{\mu, \Omega}(x)}{\varphi(y)} dx = \mathbb{E}_{\xi \sim \mathcal{N}(\check{\mu}, \check{\Omega})} f(\xi).$$

1220

□

1221 **D.3 Proof of Lemma D.3**

1222 First, let us fix  $\lambda > 0$  and consider the exponential moment  $\mathbb{E}e^{\lambda|\|\xi\|^2 - d|}$ . Using explicit expressions  
 1223 for moment generating functions of the chi-squared distribution with  $d$  degrees of freedom, we obtain  
 1224 that

$$\mathbb{E}e^{\lambda|\|\xi\|^2 - d|} \leq \mathbb{E}e^{\lambda\|\xi\|^2 - \lambda d} + \mathbb{E}e^{\lambda d - \lambda\|\xi\|^2} = \frac{e^{-\lambda d}}{(1 - 2\lambda)^{d/2}} + \frac{e^{\lambda d}}{(1 + 2\lambda)^{d/2}}.$$

1225 Let us note that

$$\frac{d^2}{dx^2} \left( -\frac{1}{2} \log(1 - 2x) \right) = \frac{2}{(1 - 2x)^2} \leq 8 \quad \text{and} \quad \frac{d^2}{dx^2} \left( -\frac{1}{2} \log(1 + 2x) \right) = \frac{2}{(1 + 2x)^2} \leq 2$$

1226 for all  $0 \leq x \leq 1/4$ . This and Taylor's expansion with a Lagrange remainder term imply that

$$-\frac{1}{2} \log(1 - 2x) \leq x + 4x^2 \quad \text{and} \quad -\frac{1}{2} \log(1 + 2x) \leq x + x^2 \quad \text{for all } 0 \leq x \leq 1/4.$$

1227 Thus, we obtain that

$$\mathbb{E}e^{\lambda|\|\xi\|^2 - d|} \leq \frac{e^{-\lambda d}}{(1 - 2\lambda)^{d/2}} + \frac{e^{\lambda d}}{(1 + 2\lambda)^{d/2}} \leq e^{4\lambda^2 d} + e^{\lambda^2 d} \quad \text{for all } 0 < \lambda \leq 1/4.$$

1228 We apply this inequality to bound the  $L_p$ -norm of  $\|\xi\|^2 - d$  using a standard technique. To be more  
 1229 precise, for any  $0 < \lambda \leq 1/4$ , it holds that

$$\begin{aligned} \mathbb{E}|\|\xi\|^2 - d|^p &= \int_0^{+\infty} \mathbb{P}(|\|\xi\|^2 - d|^p \geq u) \, du \\ &\leq \int_0^{+\infty} e^{-\lambda u^{1/p}} \mathbb{E}e^{\lambda|\|\xi\|^2 - d|} \, du \\ &\leq (e^{4\lambda^2 d} + e^{\lambda^2 d}) \int_0^{+\infty} e^{-\lambda u^{1/p}} \, du. \end{aligned}$$

1230 Let us take  $\lambda = 1/(4\sqrt{d})$ . Then, substituting  $u^{1/p}/(4\sqrt{d})$  by  $v$ , we obtain that

$$\begin{aligned} \mathbb{E}|\|\xi\|^2 - d|^p &\leq (e^{1/4} + e^{1/16}) \int_0^{+\infty} e^{-\lambda u^{1/p}} \, du \\ &= (4\sqrt{d})^p (e^{1/4} + e^{1/16}) \int_0^{+\infty} p v^{p-1} e^v \, dv \\ &= (4\sqrt{d})^p (e^{1/4} + e^{1/16}) \cdot p \Gamma(p) \\ &= (4\sqrt{d})^p (e^{1/4} + e^{1/16}) \Gamma(p + 1). \end{aligned}$$

1231 Since  $e^{1/4} + e^{1/16} \leq 5/2$  and  $\Gamma(p + 1) \leq p^p$  for all  $p \geq 1$ , the expression in the right-hand side  
 1232 does not exceed

$$(4\sqrt{d})^p (e^{1/4} + e^{1/16}) \Gamma(p + 1) \leq \frac{5}{2} \cdot (4p\sqrt{d})^p \leq (10p\sqrt{d})^p \quad \text{for all } p \geq 1.$$

1233 The proof is finished.

1234

□

## E On Schrödinger potentials in the Gaussian case

In conclusion, we would like to focus on a Gaussian setup. Given an initial distribution  $\mathcal{N}(\mu_0, Q_0)$ , a target distribution  $\mathcal{N}(\mu_T, Q_T)$ , and a reference process

$$dX_t = b(m - X_t)dt + \Sigma^{1/2}dW_t, \quad 0 \leq t \leq T,$$

we are going to derive explicit expressions for Schrödinger potentials  $\nu_0$  and  $\nu_T$  and show that the log-density of  $\nu_T$  with respect to the Lebesgue measure satisfies Assumption 3. A similar question was studied in [Bunne et al., 2023], where the authors obtained an explicit expression for a solution of a dynamic Schrödinger Bridge problem. However, the authors did not specify the potentials. In this section, we fill this gap. We would like to remind that, according to [Dai Pra, 1991, Theorem 2.2.], there exist unique (up to a multiplicative constant)  $\nu_0$  and  $\nu_T$  such that the measure

$$\pi(dx_0, dx_T) = Q(x_T, T \mid x_0, 0) \nu_0(dx_0) \nu_T(dx_T),$$

where  $Q(x_T, T \mid x_0, 0)$  is the transition density of the base process, has the marginals  $\mathcal{N}(\mu_0, Q_0)$  and  $\mathcal{N}(\mu_T, Q_T)$ . Throughout this section,

$$\nu_0(x) = \frac{d\nu_0}{dx} \quad \text{and} \quad \nu_T(x) = \frac{d\nu_T}{dx}$$

stand for the Radon-Nikodym derivatives of  $\nu_0$  and  $\nu_T$ , respectively. With this notation, we have

$$\pi(dx_0, dx_T) = Q(x_T, T \mid x_0, 0) \nu_0(x_0) \nu_T(x_T) dx_0 dx_T.$$

Let us introduce  $Z_t = \Sigma^{-1/2}X_t$ ,  $0 \leq t \leq T$ , and let  $P(z_T, T \mid z_0, 0)$  stand for the transition density of a scaled reference process

$$dZ_t = b(\Sigma^{-1/2}m - Z_t)dt + dW_t, \quad 0 \leq t \leq T.$$

Our idea is based on an observation that it is enough to find such  $\varrho_0$  and  $\varrho_T$  that the scaled coupling

$$\varpi(dz_0, dz_T) = P(z_T, T \mid z_0, 0) \varrho_0(z_0) \varrho_T(z_T) dz_0 dz_T \tag{62}$$

has the marginals  $\mathcal{N}(\Sigma^{-1/2}\mu_0, S_0)$  and  $\mathcal{N}(\Sigma^{-1/2}\mu_T, S_T)$ , where

$$S_0 = \Sigma^{-1/2}Q_0\Sigma^{-1/2} \quad \text{and} \quad S_T = \Sigma^{-1/2}Q_T\Sigma^{-1/2}. \tag{63}$$

Then, making an inverse substitution, it is easy to observe that

$$\nu_0(x_0) = \det(\Sigma)^{-1/2} \varrho_0(\Sigma^{-1/2}x_0) \quad \text{and} \quad \nu_T(x_T) = \det(\Sigma)^{-1/2} \varrho_T(\Sigma^{-1/2}x_T). \tag{64}$$

Similarly to [Bunne et al., 2023], our approach uses the fact that an entropic optimal transport plan between the Gaussian measures  $\mathcal{N}(\Sigma^{-1/2}\mu_0, S_0)$  and  $\mathcal{N}(\Sigma^{-1/2}\mu_T, S_T)$  has a form (see, for instance, [Janati et al., 2020, Theorem 1])

$$\mathcal{N}\left(\left(\begin{array}{c} \Sigma^{-1/2}\mu_0 \\ \Sigma^{-1/2}\mu_T \end{array}\right), \left(\begin{array}{cc} S_0 & A_\sigma \\ A_\sigma^\top & S_T \end{array}\right)\right) \tag{65}$$

with

$$D_\sigma = \left(4S_0^{1/2}S_TS_0^{1/2} + \sigma^4 I_d\right)^{1/2} \tag{66}$$

and

$$A_\sigma = \frac{1}{2} \left(S_0^{1/2}D_\sigma S_0^{-1/2} - \sigma^2 I_d\right). \tag{67}$$

Here  $\sigma > 0$  is a penalization parameter in the entropic optimal transport problem (see [Bunne et al., 2023], eq. (1)). It turns out that the coupling  $\varpi$  from (62) is equal to (65) with an appropriate  $\sigma$ . We are ready to move to the main result of this section.

**Proposition E.1.** *Set*

$$\sigma^2 = \frac{1 - e^{-2bT}}{2b} \cdot e^{bT} \tag{68}$$

and let

$$\check{S}_0 = S_0 - A_\sigma S_T^{-1} A_\sigma^\top, \quad \check{S}_T = S_T - A_\sigma^\top S_0^{-1} A_\sigma, \tag{69}$$

1262 where  $A_\sigma$  is defined in (67). With the notations introduced above, it holds that

$$\begin{aligned} \log \varrho_0(z_0) = & -\frac{1}{2} \left\| \check{S}_0^{-1/2} (z_0 - \Sigma^{-1/2} \mu_0) \right\|^2 + \frac{be^{-2bT} \|z_0\|^2}{(1 - e^{-2bT})} \\ & - \frac{2b((1 - e^{-bT})m + \mu_T)^\top \Sigma^{-1/2} z_0}{e^{bT}(1 - e^{-2bT})} + C_0 \end{aligned}$$

1263 and

$$\begin{aligned} \log \varrho_T(z_T) = & -\frac{1}{2} \left\| \check{S}_T^{-1/2} (z_T - \Sigma^{-1/2} \mu_T) \right\|^2 + \frac{b\|z_T\|^2}{(1 - e^{-2bT})} \\ & - \frac{2b((1 - e^{-bT})m + e^{-bT} \mu_0)^\top \Sigma^{-1/2} z_T}{(1 - e^{-2bT})} + C_T, \end{aligned}$$

1264 where  $C_0$  and  $C_T$  are some constants.

1265 The proof of Proposition E.1 is moved to Appendix E.1. In view of (64), it yields that there are some  
1266 constants  $\tilde{C}_0$  and  $\tilde{C}_T$  such that

$$\begin{aligned} \log v_0(x_0) = & -\frac{1}{2} \left\| \check{S}_0^{-1/2} \Sigma^{-1/2} (x_0 - \mu_0) \right\|^2 + \frac{be^{-2bT} \|\Sigma^{-1/2} x_0\|^2}{(1 - e^{-2bT})} \\ & - \frac{2b((1 - e^{-bT})m + \mu_T)^\top \Sigma^{-1} x_0}{e^{bT}(1 - e^{-2bT})} + \tilde{C}_0 \end{aligned}$$

1267 and

$$\begin{aligned} \log v_T(x_T) = & -\frac{1}{2} \left\| \check{S}_T^{-1/2} \Sigma^{-1/2} (x_T - \mu_T) \right\|^2 + \frac{b\|\Sigma^{-1/2} x_T\|^2}{(1 - e^{-2bT})} \\ & - \frac{2b((1 - e^{-bT})m + e^{-bT} \mu_0)^\top \Sigma^{-1} x_T}{(1 - e^{-2bT})} + \tilde{C}_T. \end{aligned}$$

1268 Let us note that  $-\log v_T(x_T)$  grows as fast as  $\mathcal{O}(\|x_T\|^2)$ . Besides, if

$$S_T = \Sigma^{-1/2} Q_T \Sigma^{-1/2} \preceq \frac{1 - e^{-2bT}}{2b} I_d,$$

1269 then

$$\check{S}_T = S_T - A_\sigma^\top S_0^{-1} A_\sigma \prec S_T \preceq \frac{1 - e^{-2bT}}{2b} I_d,$$

1270 and the potential  $\varrho_T(z_T)$  (and, hence,  $v_T(x_T)$  as well) is bounded. This gives a hint on how a learner  
1271 should choose  $b$  and  $T$ .

## 1272 E.1 Proof of Proposition E.1

1273 Let  $\sigma > 0$  be as defined in (68) and let the measure  $\varpi$  from (62) be equal to

$$\mathcal{N} \left( \begin{pmatrix} \Sigma^{-1/2} \mu_0 \\ \Sigma^{-1/2} \mu_T \end{pmatrix}, \begin{pmatrix} S_0 & A_\sigma \\ A_\sigma^\top & S_T \end{pmatrix} \right),$$

1274 where  $S_0$  and  $S_T$  are defined in (63) and  $A_\sigma$  is given by (67). Using the block-matrix inversion  
1275 formula

$$\begin{pmatrix} S_0 & A_\sigma \\ A_\sigma^\top & S_T \end{pmatrix}^{-1} = \begin{pmatrix} \check{S}_0^{-1} & -\check{S}_0^{-1} A_\sigma S_T^{-1} \\ -S_T^{-1} A_\sigma^\top \check{S}_0^{-1} & \check{S}_T^{-1} \end{pmatrix}$$

1276 with the Schur complements  $\check{S}_0$  and  $\check{S}_T$  defined in (69), we obtain that the log-density of  $\varpi$  with  
 1277 respect to the Lebesgue measure on  $\mathbb{R}^{2d}$  satisfies

$$\begin{aligned} \log \frac{\varpi(dz_0, dz_T)}{dz_0 dz_T} &= -\frac{1}{2} \begin{pmatrix} z_0 - \Sigma^{-1/2} \mu_0 \\ z_T - \Sigma^{-1/2} \mu_T \end{pmatrix}^\top \begin{pmatrix} S_0 & A_\sigma \\ A_\sigma^\top & S_T \end{pmatrix}^{-1} \begin{pmatrix} z_0 - \Sigma^{-1/2} \mu_0 \\ z_T - \Sigma^{-1/2} \mu_T \end{pmatrix} + C \\ &= -\frac{1}{2} \begin{pmatrix} z_0 - \Sigma^{-1/2} \mu_0 \\ z_T - \Sigma^{-1/2} \mu_T \end{pmatrix}^\top \begin{pmatrix} \check{S}_0^{-1} & -\check{S}_0^{-1} A_\sigma S_T^{-1} \\ -S_T^{-1} A_\sigma^\top \check{S}_0^{-1} & \check{S}_T^{-1} \end{pmatrix} \begin{pmatrix} z_0 - \Sigma^{-1/2} \mu_0 \\ z_T - \Sigma^{-1/2} \mu_T \end{pmatrix} + C \\ &= -\frac{1}{2} \left\| \check{S}_0^{-1/2} (z_0 - \Sigma^{-1/2} \mu_0) \right\|^2 - \frac{1}{2} \left\| \check{S}_T^{-1/2} (z_T - \Sigma^{-1/2} \mu_T) \right\|^2 \\ &\quad + (z_0 - \Sigma^{-1/2} \mu_0)^\top \check{S}_0^{-1} A_\sigma S_T^{-1} (z_T - \Sigma^{-1/2} \mu_T) + C, \end{aligned} \quad (70)$$

1278 where  $C$  is a normalizing constant. We are going to show that  $\check{S}_0 S_T = \sigma^2 A_\sigma$ . According to the  
 1279 definition of  $\check{S}_0$  (see (69)), it holds that

$$\begin{aligned} \check{S}_0 S_T &= (S_0 - A_\sigma S_T^{-1} A_\sigma^\top) S_T \\ &= S_0 S_T - A_\sigma S_T^{-1} A_\sigma^\top S_T \\ &= S_0 S_T - \frac{1}{4} \left( S_0^{1/2} D_\sigma S_0^{-1/2} - \sigma^2 I_d \right) S_T^{-1} \left( S_0^{-1/2} D_\sigma S_0^{1/2} - \sigma^2 I_d \right) S_T \\ &= S_0 S_T - \frac{1}{4} S_0^{1/2} D_\sigma S_0^{-1/2} S_T^{-1} S_0^{-1/2} D_\sigma S_0^{1/2} S_T \\ &\quad + \frac{\sigma^2}{4} S_0^{1/2} D_\sigma S_0^{-1/2} + \frac{\sigma^2}{4} S_T^{-1} S_0^{-1/2} D_\sigma S_0^{1/2} S_T - \frac{\sigma^4}{4} I_d. \end{aligned} \quad (71)$$

1280 Let us elaborate on the second and the fourth terms in the right-hand side of (71). Let us note that, due  
 1281 to the definition of  $D_\sigma$  (see (66)), it commutes with  $S_0^{1/2} S_T S_0^{1/2}$ , because these symmetric matrices  
 1282 share the same eigenvectors. This yields that

$$\begin{aligned} S_0^{1/2} D_\sigma S_0^{-1/2} S_T^{-1} S_0^{-1/2} D_\sigma S_0^{1/2} S_T &= S_0^{1/2} D_\sigma^2 S_0^{-1/2} \\ &= S_0^{1/2} (4S_0^{1/2} S_T S_0^{1/2} + \sigma^4 I_d) S_0^{-1/2} \\ &= 4S_0 S_T + \sigma^4 I_d. \end{aligned} \quad (72)$$

1283 Similarly, it holds that

$$S_T^{-1} S_0^{-1/2} D_\sigma S_0^{1/2} S_T = S_T^{-1} S_0^{-1/2} D_\sigma S_0^{1/2} S_T S_0^{1/2} S_0^{-1/2} = S_0^{1/2} D_\sigma S_0^{-1/2}. \quad (73)$$

1284 Summing up (71), (72), and (73), we obtain that

$$\begin{aligned} \check{S}_0 S_T &= S_0 S_T - \frac{1}{4} (4S_0 S_T + \sigma^4 I_d) + \frac{\sigma^2}{4} S_0^{1/2} D_\sigma S_0^{-1/2} + \frac{\sigma^2}{4} S_0^{1/2} D_\sigma S_0^{-1/2} - \frac{\sigma^4}{4} I_d \\ &= \frac{\sigma^2}{2} \left( S_0^{1/2} D_\sigma S_0^{-1/2} - \sigma^2 I_d \right) = \sigma^2 A_\sigma, \end{aligned}$$

1285 as we announced. This and (70) yield that

$$\begin{aligned} \log \frac{\varpi(dz_0, dz_T)}{dz_0 dz_T} &= -\frac{1}{2} \left\| \check{S}_0^{-1/2} (z_0 - \Sigma^{-1/2} \mu_0) \right\|^2 - \frac{1}{2} \left\| \check{S}_T^{-1/2} (z_T - \Sigma^{-1/2} \mu_T) \right\|^2 \\ &\quad + (z_0 - \Sigma^{-1/2} \mu_0)^\top \check{S}_0^{-1} A_\sigma S_T^{-1} (z_T - \Sigma^{-1/2} \mu_T) + C \\ &= -\frac{1}{2} \left\| \check{S}_0^{-1/2} (z_0 - \Sigma^{-1/2} \mu_0) \right\|^2 - \frac{1}{2} \left\| \check{S}_T^{-1/2} (z_T - \Sigma^{-1/2} \mu_T) \right\|^2 \\ &\quad + \frac{1}{\sigma^2} (z_0 - \Sigma^{-1/2} \mu_0)^\top (z_T - \Sigma^{-1/2} \mu_T) + C. \end{aligned} \quad (74)$$

1286 On the other hand, in view of (62), we have

$$\log \frac{\varpi(dz_0, dz_T)}{dz_0 dz_T} = \log \mathbf{P}(z_T, T \mid z_0, 0) + \log \varrho_0(z_0) + \log \varrho_T(z_T),$$

1287 where the transition density  $P(z_T, T \mid z_0, 0)$  of the scaled reference process is given by

$$\begin{aligned} P(z_T, T \mid z_0, 0) &= (2\pi)^{-d/2} \cdot \left( \frac{1 - e^{-2bT}}{2b} \right)^{-d/2} \\ &\quad \cdot \exp \left\{ -\frac{1}{2} \cdot \frac{2b}{1 - e^{-2bT}} \cdot \left\| z_T - (1 - e^{-bT})\Sigma^{-1/2}m - e^{-bT}z_0 \right\|^2 \right\} \\ &= \left( \frac{\pi(1 - e^{-2bT})}{b} \right)^{-d/2} \exp \left\{ -\frac{e^{bT}}{2\sigma^2} \left\| z_T - (1 - e^{-bT})\Sigma^{-1/2}m - e^{-bT}z_0 \right\|^2 \right\}. \end{aligned}$$

1288 This equality, combined with (74), implies that

$$\begin{aligned} &\log \varrho_0(z_0) + \log \varrho_T(z_T) \\ &= \log \frac{\varpi(dz_0, dz_T)}{dz_0 dz_T} - \log P(z_T, T \mid z_0, 0) \\ &= -\frac{1}{2} \left\| \check{S}_0^{-1/2}(z_0 - \Sigma^{-1/2}\mu_0) \right\|^2 - \frac{1}{2} \left\| \check{S}_T^{-1/2}(z_T - \Sigma^{-1/2}\mu_T) \right\|^2 \\ &\quad + \frac{e^{bT}\|z_T\|^2}{2\sigma^2} + \frac{e^{-bT}\|z_0\|^2}{2\sigma^2} + \frac{e^{bT}(1 - e^{-bT})^2\|m\|^2}{2\sigma^2} \\ &\quad - \frac{((1 - e^{-bT})m + \mu_T)^\top \Sigma^{-1/2}z_0}{\sigma^2} - \frac{(e^{bT}(1 - e^{-bT})m + \mu_0)^\top \Sigma^{-1/2}z_T}{\sigma^2} \\ &\quad + \frac{\mu_0^\top \Sigma^{-1}\mu_T}{\sigma^2} + \frac{d}{2} \log \left( \frac{\pi(1 - e^{-2bT})}{b} \right) + C. \end{aligned}$$

1289 Hence, there exist constants  $C_0$  and  $C_T$  such that

$$\begin{aligned} \log \varrho_0(z_0) &= -\frac{1}{2} \left\| \check{S}_0^{-1/2}(z_0 - \Sigma^{-1/2}\mu_0) \right\|^2 + \frac{e^{-bT}\|z_0\|^2}{2\sigma^2} \\ &\quad - \frac{((1 - e^{-bT})m + \mu_T)^\top \Sigma^{-1/2}z_0}{\sigma^2} + C_0 \\ &= -\frac{1}{2} \left\| \check{S}_0^{-1/2}(z_0 - \Sigma^{-1/2}\mu_0) \right\|^2 + \frac{be^{-2bT}\|z_0\|^2}{(1 - e^{-2bT})} \\ &\quad - \frac{2b((1 - e^{-bT})m + \mu_T)^\top \Sigma^{-1/2}z_0}{e^{bT}(1 - e^{-2bT})} + C_0 \end{aligned}$$

1290 and

$$\begin{aligned} \log \varrho_T(z_T) &= -\frac{1}{2} \left\| \check{S}_T^{-1/2}(z_T - \Sigma^{-1/2}\mu_T) \right\|^2 + \frac{e^{bT}\|z_T\|^2}{2\sigma^2} \\ &\quad - \frac{(e^{bT}(1 - e^{-bT})m + \mu_0)^\top \Sigma^{-1/2}z_T}{\sigma^2} + C_T \\ &= -\frac{1}{2} \left\| \check{S}_T^{-1/2}(z_T - \Sigma^{-1/2}\mu_T) \right\|^2 + \frac{b\|z_T\|^2}{(1 - e^{-2bT})} \\ &\quad - \frac{2b((1 - e^{-bT})m + e^{-bT}\mu_0)^\top \Sigma^{-1/2}z_T}{(1 - e^{-2bT})} + C_T. \end{aligned}$$

1291 Here we used the fact that we chose  $\sigma^2$  according to (68).

1292

□
